# Supplementary material for: The Modular Organization of Protein Interactions in Escherichia coli
Source: PLOS journal article supplement (doi:10.1371/journal.pcbi.1000523), 2009-10-01
Supplement: S4 (10.1371/journal.pcbi.1000523.s004) [file journal.pcbi.1000523.s004]

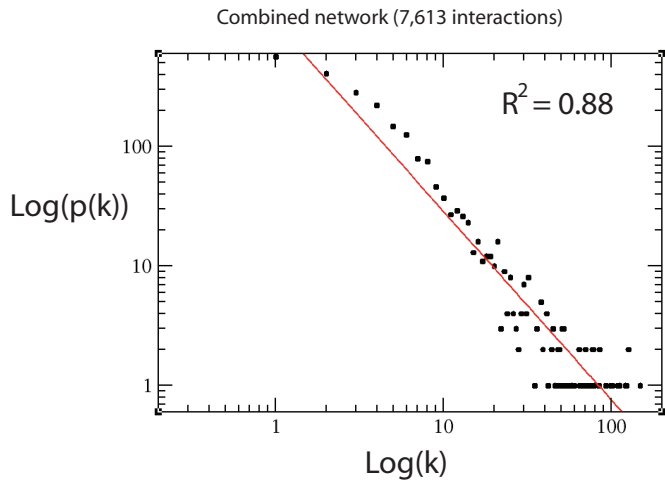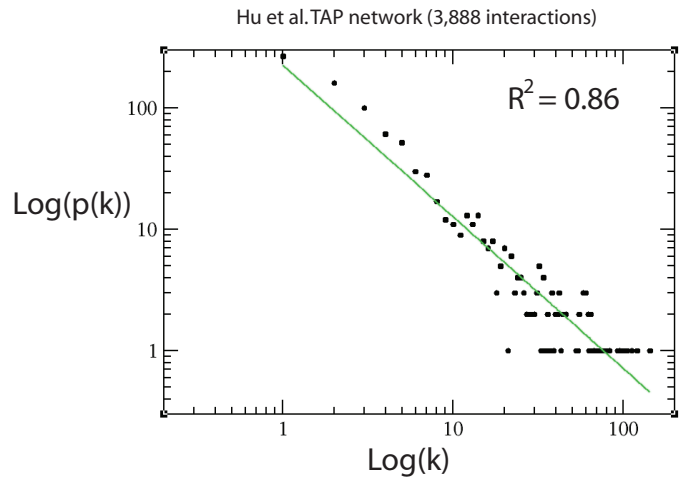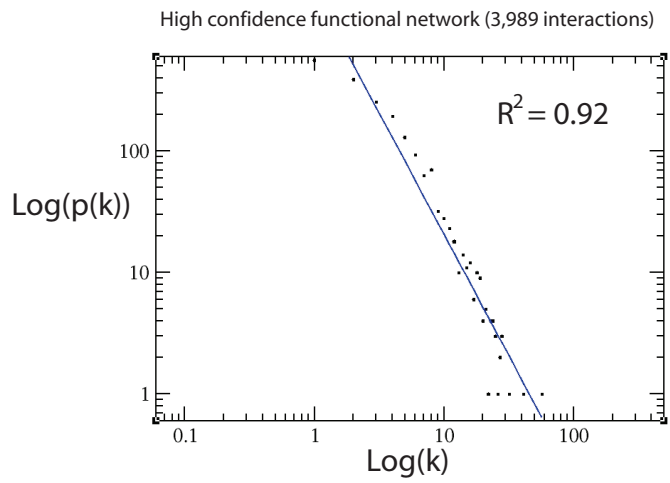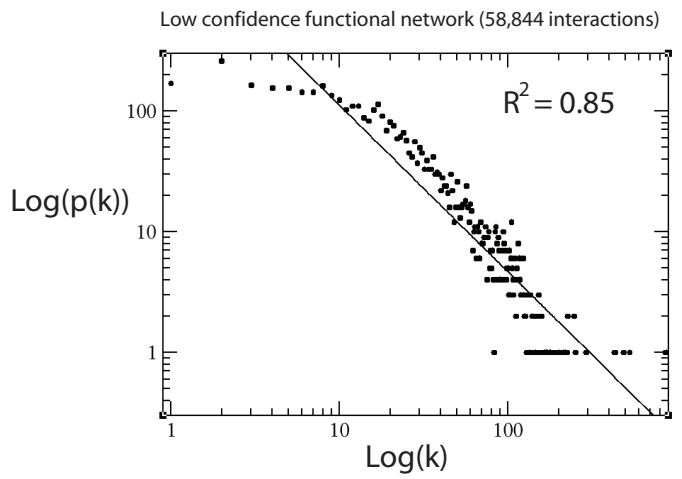

Figure S3
