# Supplementary material for: The Modular Organization of Protein Interactions in Escherichia coli
Source: PLoS Comput Biol. 2009 Oct 2;5(10):e1000523. doi: 10.1371/journal.pcbi.1000523 (PMC2739439; doi:10.1371/journal.pcbi.1000523)
Supplement: Table S3 — Functional module predictions for the combined, functional and Hu et al. TAP networks. Functional modules were predicted by using the MCL algorithm (see Methods). Locus ids, gene names, COGs categories (“-” if there is not COG assigment) and annotation description were obtained from the COGs database [20]. COG category codes are provided in Fig. 1C. EcoCyc annotations were obtained from the EcoCyc database resource [19]. (0.70 MB XLS) [file pcbi.1000523.s013.xls]

## Sheet: Sheet1
	SUPPLEMENTAL TABLE 3. Functional module predictions for the combined, functional and Hu et al. TAP networks
	COMBINED NETWORK
	Module#	Locus id	Gene name	COGs	Description	EcoCyc Categories
	1	b0180	fabZ	I	(3R)-hydroxymyristoyl ACP dehydratase	PWYS_FASYN-ELONG-PWY - PWYS_PWY0-862
	1	b3294	rplQ	J	50S ribosomal protein L17
	1	b4172	hfq	R	RNA-binding protein Hfq
	1	b0127	yadG	V	putative ATP-binding component of a transport system	PCs_ABC-21-CPLX
	1	b0143	pcnB	J	poly(A) polymerase I
	1	b3164	pnp	J	polynucleotide phosphorylase, has polyadenylase activity	PCs_CPLX0-2381 - TFs-RGPs_PC00004 - TFs-RGPs_PC00005 - TFs-RGPs_PD00196
	1	b1413	hrpA	L	helicase, ATP-dependent
	1	b0179	lpxD	M	UDP-3-O-[3-hydroxymyristoyl] glucosamine N-acyltransferase	PWYS_NAGLIPASYN-PWY
	1	b1269	yciL	J	pseudouridine synthase (makes pseudouridine2605 in 23 S RNA)
	1	b2585	pssA	I	phosphatidylserine synthase	PWYS_PHOSLIPSYN-PWY
	1	b2581	yfiF	J	putative tRNA/rRNA methyltransferase
	1	b0406	tgt	J	queuine tRNA-ribosyltransferase
	1	b0948	ycbY	L	putative methyltransferase
	1	b3162	deaD	LKJ	cold-shock DeaD box ATP-dependent RNA helicase
	1	b0912	himD	L	integration host factor beta subunit	PCs_PC00027 - TFs-RGPs_PC00027
	1	b0528	ybcJ	S	unknown CDS
	1	b0953	rmf	J	ribosome modulation factor
	1	b1084	rne	J	RNase E, membrane attachment, mRNA turnover, maturation 5S RNA	PCs_CPLX0-2381
	1	b1086	rluC	J	23S rRNA pseudouridylate synthase
	1	b2576	srmB	LKJ	ATP-dependent RNA helicase
	1	b3054	ygiF	S	hypothetical protein
	1	b3305	rplF	J	50S ribosomal protein L6
	1	b3499	yhiR	R	hypothetical protein
	1	b3780	rhlB	LKJ	ATP-dependent RNA helicase	PCs_CPLX0-2381
	1	b4179	rnr	K	RNase R
	1	b4187	aidB	I	putative acyl coenzyme A dehydrogenase	PWYS_FAO-PWY - TFs-RGPs_PD00230 - TFs-RGPs_PD00353
	1	b0905	ycaO	S	hypothetical protein
	1	b0660	ybeZ	T	putative ATP-binding protein in pho regulon
	1	b3180	yhbY	J	hypothetical protein
	1	b0877	ybjX	S	putative enzyme
	1	b0880	cspD	K	DNA replication inhibitor, nucleic acid-binding domain
	1	b1823	cspC	K	cold shock protein
	1	b3650	spoT	TK	(p)ppGpp synthetase II; also guanosine-3',5'-bis pyrophosphate 3'-pyrophosphohydrolase	PWYS_PPGPPMET-PWY
	1	b0967	yccW	R	putative methyltransferase
	1	b4325	yjiC	-	unknown CDS
	1	b3247	rng	J	RNase G
	1	b1135	ymfC	J	pseudouridine synthase (makes pseudouridine2457 in 23 S RNA)
	1	b1452	yncE	S	putative receptor
	1	b3602	yibL	-	hypothetical protein
	1	b2185	rplY	J	50S ribosomal protein L25
	1	b3809	dapF	E	diaminopimelate epimerase	PWYS_DAPLYSINESYN-PWY
	1	b4469	ygiQ	-	hypothetical protein
	1	b1343	dbpA	LKJ	ATP-dependent RNA helicase
	1	b3590	selB	J	selenocysteinyl-tRNA-specific translation factor
	1	b1686	ydiI	Q	hypothetical protein
	1	b0797	rhlE	LKJ	putative ATP-dependent RNA helicase
	1	b1919	yedO	E	D-cysteine desulfhydrase
	1	b2007	yeeX	S	hypothetical protein
	1	b1951	rcsA	K	positive regulator for ctr capsule biosynthesis, positive transcription factor	PCs_PC00084 - TFs-RGPs_EG11544-MONOMER - TFs-RGPs_PC00084 - TFs-RGPs_PD00288
	1	b3185	rpmA	J	50S ribosomal protein L27
	1	b2294	yfbU	S	hypothetical protein
	1	b2351	yfdH	M	CPS-53 (KpLE1) prophage; putative bactoprenol glucosyl transferase
	1	b2517	yfgB	R	putative pyruvate formate lyase activating enzyme 2
	1	b2830	ygdP	LC	dinucleoside polyphosphate hydrolase
	1	b1410	ynbC	QI	putative methylase
	1	b3311	rpsQ	J	30S ribosomal protein S17
	1	b2922	yggE	S	putative actin
	1	b2960	yggH	R	tRNA (guanine-N(7)-)-methyltransferase
	1	b0984	ymcA	-	hypothetical protein
	1	b3591	selA	E	selenocysteine synthase	PWYS_PWY0-901
	1	b3704	rnpA	J	ribonuclease P
	1	b3928	yiiU	S	hypothetical protein
	1	b4177	purA	F	adenylosuccinate synthetase	PWYS_DENOVOPURINE2-PWY - TFs-RGPs_EG11544-MONOMER
	1	b4234	yjgA	S	hypothetical protein
	2	b0114	aceE	C	pyruvate dehydrogenase (decarboxylase component)	PCs_PYRUVATEDEH-CPLX - PWYS_ANARESP1-PWY - PWYS_GLYOXDEG-PWY - PWYS_PYRUVDEHYD-PWY - TFs-RGPs_EG11088-MONOMER - TFs-RGPs_PC00004 - TFs-RGPs_PD00197
	2	b0890	ftsK	D	cell division protein
	2	b0228	yafM	L	hypothetical protein
	2	b1300	aldH	C	aldehyde dehydrogenase, prefers NADP over NAD
	2	b0359	-	R	putative acyl transferase
	2	b2565	recO	L	DNA repair protein RecO	PCs_RECFOR-CPLX
	2	b0489	ybbK	O	putative protease
	2	b0524	ybbF	S	UDP-2,3-diacylglucosamine hydrolase	PWYS_NAGLIPASYN-PWY
	2	b0542	renD	-	DLP12 prophage
	2	b0579	ybdF	S	hypothetical protein
	2	b0608	ybdR	E	putative dehydrogenase, NAD(P)-binding
	2	b0886	cydC	CO	ATP-binding component of cytochrome-related transport	PCs_ABC-6-CPLX - TFs-RGPs_NARL-MONOMER - TFs-RGPs_PD00197
	2	b0887	cydD	CO	ATP-binding component of cytochrome-related transport, Zn sensitive	PCs_ABC-6-CPLX - TFs-RGPs_NARL-MONOMER - TFs-RGPs_PD00197
	2	b0780	ybhK	S	putative phosphatase/sulfatase
	2	b0794	ybhF	V	putative ATP-binding component of a transport system	PCs_ABC-57-CPLX
	2	b0812	dps	P	DNA protection during starvation conditions	TFs-RGPs_PC00027 - TFs-RGPs_PD00214
	2	b0901	ycaK	R	putative electron transfer flavoprotein-NAD/FAD/quinone oxidoreductase
	2	b1035	ycdY	R	putative oxidoreductase component
	2	b1163	ycgF	T	hypothetical protein
	2	b1190	alr	M	alanine racemase	PWYS_ALADEG-PWY - PWYS_ALANINE-VALINESYN-PWY - TFs-RGPs_PC00004 - TFs-RGPs_PD00353
	2	b1284	yciT	KG	putative DEOR-type transcriptional regulator
	2	b1287	yciW	S	putative oxidoreductase
	2	b1415	aldA	C	aldehyde dehydrogenase A, NAD-linked	PWYS_4AMINOBUTMETAB-PWY - PWYS_FUCCAT-PWY - PWYS_GLYCOLATEMET-PWY - PWYS_METHGLYUT-PWY - PWYS_RHAMCAT-PWY - TFs-RGPs_ARCA-MONOMER - TFs-RGPs_PC00004 - TFs-RGPs_PD03831
	2	b3588	aldB	C	aldehyde dehydrogenase B (lactaldehyde dehydrogenase)	PWYS_FUCCAT-PWY - PWYS_METHGLYUT-PWY - PWYS_PUTDEG-PWY - PWYS_RHAMCAT-PWY - TFs-RGPs_PC00004 - TFs-RGPs_PD00196
	2	b1335	ogt	L	O-6-alkylguanine-DNA/cysteine-protein methyltransferase
	2	b1458	-	L	hypothetical protein
	2	b1583	ynfB	-	hypothetical protein
	2	b1671	ydhX	C	putative oxidoreductase, Fe-S subunit
	2	b1773	ydjI	G	putative aldolase
	2	b1792	yeaO	S	hypothetical protein
	2	b1808	yoaA	KL	putative ATP-dependent helicase, SOS repair
	2	b1961	dcm	L	DNA cytosine methylase
	2	b2055	wcaE	M	putative colanic acid biosynthesis glycosyl transferase
	2	b2056	wcaD	-	putative colanic acid polymerase
	2	b4258	valS	J	valyl-tRNA synthetase	PWYS_TRNA-CHARGING-PWY
	2	b2473	ypfH	R	hypothetical protein
	2	b2494	yfgC	R	hypothetical protein
	2	b2730	hypE	O	plays structural role in maturation of all 3 hydrogenase	TFs-RGPs_PC00027 - TFs-RGPs_PD00197 - TFs-RGPs_PD02936
	2	b2717	hycI	C	protease involved in processing C-terminal end of HycE
	2	b2726	hypA	R	hydrogenase nickel incorporation protein	TFs-RGPs_PC00027 - TFs-RGPs_PD02936
	2	b3148	yraN	L	hypothetical protein
	2	b3239	yhcO	K	hypothetical protein
	2	b3252	yhdA	T	hypothetical protein
	2	b3353	yheT	R	putative enzyme with alpha/beta-hydrolase domain
	2	b3387	dam	L	DNA adenine methylase
	2	b3676	yidH	S	hypothetical protein
	2	b3740	gidB	M	glucose-inhibited division protein B
	2	b3836	tatA	U	twin argininte translocase protein A	PCs_TATABCE-CPLX
	2	b3838	tatB	U	sec-independent translocase	PCs_TATABCE-CPLX
	2	b3839	tatC	U	component of Sec-independent translocase	PCs_TATABCE-CPLX
	2	b3965	trmA	J	tRNA (uracil-5-)-methyltransferase
	2	b4361	dnaC	L	DNA replication protein DnaC
	2	b4310	yjhT	S	putative enzyme contains galactose oxidase-like domain
	2	b4362	dnaT	-	primosomal protein I
	2	b4394	yjjX	S	hypothetical protein
	3	b0229	fhiA	NU	flagellar biosynthesis
	3	b1074	flgC	N	flagellar basal body rod protein	PCs_FLAGELLAR-MOTOR-COMPLEX		(xerc recmobinase?)
	3	b1076	flgE	N	flagellar hook protein
	3	b1078	flgG	N	flagellar biosynthesis, cell-distal portion of basal-body rod	PCs_FLAGELLAR-MOTOR-COMPLEX		outermembrane
	3	b1880	flhB	NU	flagellar biosynthesis protein			transaldolase
	3	b1938	fliF	NU	flagellar M-ring protein	PCs_FLAGELLAR-MOTOR-COMPLEX		2 component system
	3	b1939	fliG	N	flagellar motor protein			sensor protein
	3	b1945	fliM	N	flagellar motor switch protein	PCs_FLAGELLAR-MOTOR-COMPLEX - TFs-RGPs_EG10320-MONOMER
	3	b1946	fliN	NU	flagellar motor switch protein	TFs-RGPs_EG10320-MONOMER
	3	b1948	fliP	NU	flagellar biosynthesis protein	TFs-RGPs_EG10320-MONOMER
	3	b1070	flgN	NUO	flagellar biosynthesis; believed to be export chaperone for FlgK and FlgL
	3	b1080	flgI	N	flagellar P-ring protein precursor	PCs_FLAGELLAR-MOTOR-COMPLEX
	3	b1072	flgA	NO	flagellar basal body P-ring biosynthesis protein
	3	b1073	flgB	N	flagellar basal body rod protein	PCs_FLAGELLAR-MOTOR-COMPLEX
	3	b1075	flgD	N	flagellar biosynthesis, initiation of hook assembly
	3	b1077	flgF	N	flagellar biosynthesis, cell-proximal portion of basal-body rod	PCs_FLAGELLAR-MOTOR-COMPLEX		cell wall
	3	b1079	flgH	N	flagellar L-ring protein precursor			ribsomal protein
	3	b1081	flgJ	NUMO	flagellar biosynthesis protein
	3	b1082	flgK	N	flagellar hook-associated protein
	3	b1083	flgL	N	flagellar hook-associated protein
	3	b1879	flhA	NU	flagellar biosynthesis protein
	3	b1923	fliC	N	flagellar biosynthesis protein	TFs-RGPs_EG11544-MONOMER - TFs-RGPs_PD00288
	3	b1941	fliI	NU	flagellum-specific ATP synthase
	3	b1950	fliR	NU	flagellar biosynthesis protein	TFs-RGPs_EG10320-MONOMER
	3	b1878	flhE	-	flagellar protein			Rna binding protein
	3	b1922	fliA	K	flagellar biosynthesis sigma factor FliA	PCs_CPLX0-222 - TFs-RGPs_EG10320-MONOMER - TFs-RGPs_PD00288
	3	b1925	fliS	NUO	flagellar protein FliS
	3	b1924	fliD	N	flagellar hook-associated protein
	3	b1937	fliE	NU	flagellar basal body protein
	3	b1926	fliT	-	flagellar biosynthesis; putative export chaperone for FliD
	3	b1942	fliJ	NUO	flagellar protein
	3	b1944	fliL	N	flagellar biosynthesis protein	TFs-RGPs_EG10320-MONOMER
	3	b1940	fliH	NU	flagellar assembly protein
	3	b1943	fliK	N	flagellar hook-length control protein
	3	b1949	fliQ	NU	flagellar biosynthesis protein	TFs-RGPs_EG10320-MONOMER
	3	b1947	fliO	N	flagellar biosynthesis	TFs-RGPs_EG10320-MONOMER
	4	b3065	rpsU	J	30S ribosomal protein S21	TFs-RGPs_PC00010
	4	b3309	rplX	J	50S ribosomal protein L24
	4	b3314	rpsC	J	30S ribosomal protein S3
	4	b3984	rplA	J	50S ribosomal protein L1
	4	b4200	rpsF	J	30S ribosomal protein S6
	4	b3320	rplC	J	50S ribosomal protein L3
	4	b3341	rpsG	J	30S ribosomal protein S7
	4	b3186	rplU	J	50S ribosomal protein L21
	4	b3231	rplM	J	50S ribosomal protein L13
	4	b3296	rpsD	J	30S ribosomal protein S4
	4	b3301	rplO	J	50S ribosomal protein L15
	4	b3313	rplP	J	50S ribosomal protein L16
	4	b3317	rplB	J	50S ribosomal protein L2
	4	b1716	rplT	J	50S ribosomal protein L20
	4	b2606	rplS	J	50S ribosomal protein L19
	4	b3230	rpsI	J	30S ribosomal protein S9
	4	b3297	rpsK	J	30S ribosomal protein S11
	4	b3298	rpsM	J	30S ribosomal protein S13
	4	b3304	rplR	J	50S ribosomal protein L18
	4	b3308	rplE	J	50S ribosomal protein L5
	4	b3319	rplD	J	50S ribosomal protein L4
	4	b4203	rplI	J	50S ribosomal protein L9
	4	b4000	hupA	L	DNA-binding protein HU-alpha (HU-2)	PCs_CPLX0-2021 - TFs-RGPs_CPLX0-2021 - TFs-RGPs_PC00004 - TFs-RGPs_PD00196
	4	b3312	rpmC	J	50S ribosomal protein L29
	4	b0474	adk	F	adenylate kinase	PWYS_DENOVOPURINE2-PWY
	4	b0506	allR	K	repressor of allantoin and glyoxylate utilization operons
	4	b3316	rpsS	J	30S ribosomal protein S19
	4	b1432	ydcM	L	putative transposase
	4	b1435	ydcP	O	putative protease
	4	b3261	fis	KL	DNA-binding protein Fis	TFs-RGPs_PC00004 - TFs-RGPs_PC00027 - TFs-RGPs_PD00196
	4	b2707	srlR	KG	regulator for gut (srl), glucitol operon	TFs-RGPs_PC00004 - TFs-RGPs_PD00283 - TFs-RGPs_PD00345
	4	b2768	ygcP	K	putative anti-terminator regulatory protein
	4	b3170	yhbC	S	hypothetical protein	TFs-RGPs_PC00004 - TFs-RGPs_PC00005 - TFs-RGPs_PD00196
	4	b4201	priB	L	primosomal replication protein N
	5	b0009	mogA	H	molybdenum cofactor biosynthesis protein
	5	b0014	dnaK	O	molecular chaperone DnaK	PCs_HSP70-CPLX
	5	b2614	grpE	O	Hsp 24 nucleotide exchange factor	PCs_HSP70-CPLX
	5	b3636	rpmG	J	50S ribosomal protein L33
	5	b2215	ompC	M	outer membrane pore protein 1b (Ib;c)	TFs-RGPs_PC00027 - TFs-RGPs_PC00029 - TFs-RGPs_PD00353 - TFs-RGPs_PD00969
	5	b3461	rpoH	K	RNA polymerase sigma factor	PCs_RNAP32-CPLX - TFs-RGPs_PC00004 - TFs-RGPs_PD03831 - TFs-RGPs_PD04028
	5	b1000	cbpA	O	curved DNA-binding protein, co-chaperone of DnaK (Hsp40 family)
	5	b0444	ybaX	R	putative (aluminum) resistance protein
	5	b1493	gadB	E	glutamate decarboxylase isozyme	TFs-RGPs_EG12242-MONOMER - TFs-RGPs_EG12243-MONOMER
	5	b2779	eno	G	phosphopyruvate hydratase	PWYS_ANARESP1-PWY - PWYS_GLUCONEO-PWY - PWYS_GLYCOLYSIS
	5	b0800	ybiB	E	hypothetical protein
	5	b0962	helD	L	DNA helicase IV
	5	b0999	yccD	-	hypothetical protein
	5	b1055	yceA	R	hypothetical protein
	5	b1776	ydjL	E	hypothetical zinc-type alcohol dehydrogenase-like protein
	5	b3517	gadA	E	glutamate decarboxylase A, isozyme, PLP-dependent	TFs-RGPs_EG11544-MONOMER - TFs-RGPs_EG12242-MONOMER - TFs-RGPs_EG12243-MONOMER - TFs-RGPs_PC00004 - TFs-RGPs_PD00288 - TFs-RGPs_TORR-CPLX
	5	b1667	ydhR	-	protein ofunknown function
	5	b1732	katE	P	catalase; hydroperoxidase HPII (III), RpoS-dependent	PWYS_DETOX1-PWY
	5	b2925	fbaA	G	fructose-bisphosphate aldolase	PWYS_GLUCONEO-PWY - PWYS_GLYCOLYSIS - PWYS_MANNIDEG-PWY - PWYS_SORBDEG-PWY
	5	b2187	yejL	S	hypothetical protein
	5	b2428	yfeU	R	hypothetical protein
	5	b2527	hscB	O	co-chaperone HscB
	5	b2582	trxC	OC	putative thioredoxin-like protein	TFs-RGPs_PD00214
	5	b2687	ygaG	T	S-ribosylhomocysteinase
	5	b2798	xni	L	exonuclease IX
	5	b3011	yqhD	C	putative alcohol dehydrogenase
	5	b3160	yhbW	C	putative enzyme
	5	b4051	qor	C	quinone oxidoreductase
	5	b3470	sirA	O	hypothetical protein
	5	b3516	gadX	K	putative ARAC-type regulatory protein	TFs-RGPs_EG11544-MONOMER - TFs-RGPs_EG12242-MONOMER - TFs-RGPs_EG12243-MONOMER - TFs-RGPs_PC00004 - TFs-RGPs_PD00288 - TFs-RGPs_TORR-CPLX
	5	b3643	rph	J	ribonuclease PH
	6	b4143	groEL	O	chaperonin GroEL
	6	b3463	ftsE	D	ATP-binding component of a membrane-associated complex involved in cell division	PCs_ABC-54-CPLX
	6	b3462	ftsX	D	cell division membrane protein	PCs_ABC-54-CPLX
	6	b3972	murB	M	UDP-N-acetylenolpyruvoylglucosamine reductase	PWYS_PEPTIDOGLYCANSYN-PWY
	6	b0209	yafD	S	hypothetical protein
	6	b0252	yafZ	-	CP4-6 prophage
	6	b0490	ybbL	R	putative ATP-binding component of a transport system
	6	b0492	ybbN	O	putative thioredoxin protein
	6	b1117	ycfV	V	putative ATP-binding component of a transport system	PCs_ABC-62-CPLX
	6	b1189	dadA	E	D-amino acid dehydrogenase small subunit	PWYS_ALADEG-PWY - TFs-RGPs_PC00004 - TFs-RGPs_PD00353
	6	b1234	ychK	R	putative transmembrane protein
	6	b1741	ydjQ	L	endonuclease in nucleotide excision repair
	6	b2036	glf	M	UDP-galactopyranose mutase
	6	b2097	fbaB	G	fructose-bisphosphate aldolase	PWYS_GLUCONEO-PWY - PWYS_GLYCOLYSIS - PWYS_MANNIDEG-PWY - PWYS_SORBDEG-PWY
	6	b2474	ypfI	R	putative acyl-CoA N-acyltransferase
	6	b2566	era	R	GTP-binding protein Era
	6	b2781	mazG	R	hypothetical protein
	6	b3464	ftsY	U	cell division membrane protein	PCs_SRP-CPLX
	6	b3195	yrbF	Q	putative ATP-binding component of a transport system	PCs_ABC-45-CPLX
	6	b2690	yqaB	R	putative phosphatase
	6	b3081	fadH	C	2,4-dieonyl-CoA reductase, FMN-linked
	6	b3205	yhbJ	R	hypothetical protein
	6	b3812	yigB	R	putative enzyme with a phophatase-like domain
	6	b4377	yjjU	R	putative transcriptional regulator
	7	b0832	yliD	EP	putative dipeptide transport protein (ABC superfamily, membrane)	PCs_ABC-49-CPLX
	7	b1485	yddQ	EP	putative ABC transport system permease protein	PCs_ABC-59-CPLX - TFs-RGPs_GLNG-CPLX
	7	b3480	nikE	EP	ATP-binding protein of nickel transport system	PCs_ABC-20-CPLX - TFs-RGPs_EG11519-MONOMER - TFs-RGPs_PD00197
	7	b3542	dppC	EP	dipeptide transport protein 2 (ABC superfamily, membrane)	PCs_ABC-8-CPLX - TFs-RGPs_PC00027
	7	b0830	yliB	E	putative dipeptide transport protein (ABC superfamily, peri_bind)	PCs_ABC-49-CPLX
	7	b0831	yliC	EP	putative dipeptide transport protein (ABC superfamily, membrane)	PCs_ABC-49-CPLX
	7	b1244	oppB	EP	oligopeptide permease ABC transporter membrane component	PCs_ABC-22-CPLX - TFs-RGPs_PD00353
	7	b1486	yddR	EP	putative ABC transport system permease protein	PCs_ABC-59-CPLX - TFs-RGPs_GLNG-CPLX
	7	b2179	yejE	R	putative oligopeptide transport protein (ABC superfamily, membrane)	PCs_ABC-41-CPLX
	7	b3477	nikB	EP	nickel transport protein (ABC superfamily, membrane)	PCs_ABC-20-CPLX - TFs-RGPs_EG11519-MONOMER - TFs-RGPs_PD00197
	7	b3478	nikC	EP	nickel transport proein (ABC superfamily, membrane)	PCs_ABC-20-CPLX - TFs-RGPs_EG11519-MONOMER - TFs-RGPs_PD00197
	7	b3543	dppB	EP	dipeptide transport protein 1 (ABC superfamily, membrane)	PCs_ABC-8-CPLX - TFs-RGPs_PC00027
	7	b1245	oppC	EP	homolog of Salmonella oligopeptide transport permease protein	PCs_ABC-22-CPLX - TFs-RGPs_PD00353
	7	b1243	oppA	E	oligopeptide transport protein (ABC superfamily, peri_bind)	PCs_ABC-22-CPLX - TFs-RGPs_PD00353
	7	b1293	sapB	V	homolog of Salmonella peptide transport permease protein	PCs_ABC-29-CPLX
	7	b1329	mppA	E	periplasmic murein tripeptide (L-Ala-gamma-D-Glut-m-DAP) permease
	7	b2178	yejB	R	putative oligopeptide transport protein (ABC superfamily, membrane)	PCs_ABC-41-CPLX
	7	b3020	ygiS	E	putative oligipeptide transport protein (ABC superfamily, peri_bind)
	7	b3476	nikA	E	nickel transport protein (ABC superfamily, peri_bind)	PCs_ABC-20-CPLX - TFs-RGPs_EG11519-MONOMER - TFs-RGPs_PD00197
	7	b3544	dppA	E	dipeptide transport protein	PCs_ABC-8-CPLX - TFs-RGPs_PC00027
	7	b1487	yddS	E	putative ABC transport system periplasmic binding protein	PCs_ABC-59-CPLX - TFs-RGPs_GLNG-CPLX
	8	b0169	rpsB	J	30S ribosomal protein S2
	8	b3178	hflB	O	ATP-dependent zinc-metallo protease	PCs_CPLX0-2982
	8	b2609	rpsP	J	30S ribosomal protein S16
	8	b0166	dapD	E	2,3,4,5-tetrahydropyridine-2-carboxylate N-succinyltransferase	PWYS_DAPLYSINESYN-PWY
	8	b0170	tsf	J	elongation factor Ts
	8	b0172	frr	J	ribosome releasing factor
	8	b0911	rpsA	J	30S ribosomal protein S1
	8	b0171	pyrH	F	uridylate kinase	PWYS_PWY0-162
	8	b3066	dnaG	L	DNA primase	TFs-RGPs_PC00010
	8	b0481	ybaK	S	hypothetical protein
	8	b0636	ybeA	S	hypothetical protein
	8	b0884	infA	J	translation initiation factor IF-1
	8	b3176	glmM	G	phosphoglucosamine mutase	PWYS_UDPNAGSYN-PWY
	8	b0931	pncB	H	nicotinate phosphoribosyltransferase	PWYS_PYRNUCYC-PWY - TFs-RGPs_PD04413
	8	b2608	rimM	J	16S rRNA-processing protein
	8	b3056	cca	J	tRNA nucleotidyl transferase
	8	b3179	rrmJ	J	23 S rRNA methyltransferase
	8	b3384	trpS	J	tryptophanyl-tRNA synthetase	PWYS_TRNA-CHARGING-PWY
	8	b3385	gph	R	phosphoglycolate phosphatase
	8	b3400	hslR	J	Hsp15; DNA/RNA binding heat shock protein
	9	b0083	ftsL	D	cell division protein; ingrowth of wall at septum
	9	b0084	ftsI	M	division-specific transpeptidase, penicillin-binding protein 3
	9	b0085	murE	M	UDP-N-acetylmuramoylalanyl-D-glutamate--2,6-diaminopimelate ligase	PWYS_PEPTIDOGLYCANSYN-PWY
	9	b0086	murF	M	D-alanine:D-alanine-adding enzyme	PWYS_PEPTIDOGLYCANSYN-PWY
	9	b0087	mraY	M	phospho-N-acetylmuramoyl-pentapeptide-transferase	PWYS_PEPTIDOGLYCANSYN-PWY
	9	b0088	murD	M	UDP-N-acetylmuramoyl-L-alanyl-D-glutamate synthetase	PWYS_PEPTIDOGLYCANSYN-PWY
	9	b0089	ftsW	D	cell division; membrane protein involved in shape determination
	9	b0090	murG	M	N-acetylglucosaminyl transferase	PWYS_PEPTIDOGLYCANSYN-PWY
	9	b0093	ftsQ	M	cell division protein; ingrowth of wall at septum	TFs-RGPs_PD02198
	9	b0096	lpxC	M	UDP-3-O-[3-hydroxymyristoyl] N-acetylglucosamine deacetylase	PWYS_NAGLIPASYN-PWY
	9	b1168	ycgG	T	putative protease
	9	b2748	ftsB	D	cell divison protein FtsB
	9	b3933	ftsN	D	essential cell division protein
	9	b0091	murC	M	UDP-N-acetylmuramate--L-alanine ligase	PWYS_PEPTIDOGLYCANSYN-PWY
	9	b0092	ddl	M	D-alanylalanine synthetase	PWYS_PEPTIDOGLYCANSYN-PWY
	9	b0634	mrdB	D	rod shape-determining membrane protein; cell elongation
	9	b0635	mrdA	M	cell elongation, e phase; peptidoglycan synthetase; penicillin-binding protein 2
	9	b4233	mpl	M	UDP-N-acetylmuramate:L-alanyl-gamma-D-glutamyl-meso-diaminopimelate ligase	TFs-RGPs_PC00004
	10	b3705	yidC	U	inner membrane protein translocase component YidC	PCs_SEC-SECRETION-CPLX - PCs_SECD-SECF-YAJC-YIDC-CPLX
	10	b3189	murA	M	UDP-N-acetylglucosamine 1-carboxyvinyltransferase	PWYS_PEPTIDOGLYCANSYN-PWY
	10	b3701	dnaN	L	DNA polymerase III subunit beta	TFs-RGPs_EG10490-MONOMER - TFs-RGPs_PD03831
	10	b3703	rpmH	J	50S ribosomal protein L34
	10	b3781	trxA	OC	thioredoxin	TFs-RGPs_PC00004
	10	b1004	wrbA	R	TrpR binding protein WrbA
	10	b1051	msyB	-	acidic protein suppresses mutants lacking function of protein export
	10	b1103	ycfF	FG	putative protein kinase C inhibitor
	10	b1852	zwf	G	glucose-6-phosphate 1-dehydrogenase	PWYS_ENTNER-DOUDOROFF-PWY - PWYS_OXIDATIVEPENT-PWY - TFs-RGPs_PD00365 - TFs-RGPs_PD00406 - TFs-RGPs_PD04418
	10	b3700	recF	L	recombination protein F	PCs_RECFOR-CPLX - TFs-RGPs_EG10490-MONOMER - TFs-RGPs_PD03831
	10	b2496	hda	L	DNA replication initiation factor
	10	b3003	yghA	Q	oxidoreductase
	10	b3203	yhbH	J	probable sigma-54 modulation protein
	10	b3713	yieF	R	putative oxidoreductase, flavoprotein
	10	b3764	yifE	S	putative transcriptional regulator with pssR
	10	b3807	cyaY	P	frataxin-like protein
	10	b4135	yjdC	K	putative regulator (TetR/AcrR family)
	11	b3339	tuf	J	elongation factor Tu
	11	b3725	pstB	P	ATP-binding component of high-affinity phosphate-specific transport system	PCs_ABC-27-CPLX - TFs-RGPs_PC00027 - TFs-RGPs_PHOB-MONOMER
	11	b3980	tuf	J	elongation factor Tu	TFs-RGPs_EG11544-MONOMER
	11	b0126	yadF	P	putative carbonic anhdrase	PWYS_CYANCAT-PWY
	11	b0190	yaeQ	S	hypothetical protein
	11	b0420	dxs	HI	1-deoxy-D-xylulose-5-phosphate synthase	PWYS_NONMEVIPP-PWY - PWYS_PYRIDOXSYN-PWY - PWYS_THISYN-PWY
	11	b0438	clpX	O	ATP-dependent protease ATP-binding subunit	PCs_CPLX0-3107 - PCs_CPLX0-3108
	11	b2592	clpB	O	ATP-dependent protease, Hsp 100, part of multi-chaperone system with DnaK, DnaJ, and GrpE
	11	b1957	yodC	S	unknown CDS
	11	b2290	yfbQ	E	aspartate aminotransferase
	11	b2869	ygeV	KT	putative transcriptional regulator
	11	b3352	yheS	R	putative ATP-binding component of a transport system
	11	b3401	hslO	O	Hsp33-like chaperonin
	11	b3465	yhhF	L	putative methyltransferase
	11	b3697	yidA	R	conserved protein, phophatase-like domain
	11	b4137	cutA	P	divalent cation tolerance protein; cytochrome c biogenesis
	12	b3988	rpoC	K	DNA-directed RNA polymerase beta' subunit	PCs_APORNAP-CPLX - PCs_CPLX0-221 - PCs_CPLX0-222 - PCs_RNAP32-CPLX - PCs_RNAP54-CPLX - PCs_RNAP70-CPLX - PCs_RNAPE-CPLX - PCs_RNAPS-CPLX
	12	b3169	nusA	K	transcription elongation factor NusA	TFs-RGPs_PC00004 - TFs-RGPs_PC00005 - TFs-RGPs_PD00196
	12	b3181	greA	K	transcription elongation factor GreA
	12	b0059	hepA	KL	ATP-dependent helicase HepA
	12	b3295	rpoA	K	DNA-directed RNA polymerase alpha subunit	PCs_APORNAP-CPLX - PCs_CPLX0-221 - PCs_CPLX0-222 - PCs_RNAP32-CPLX - PCs_RNAP54-CPLX - PCs_RNAP70-CPLX - PCs_RNAPE-CPLX - PCs_RNAPS-CPLX
	12	b3165	rpsO	J	30S ribosomal protein S15	TFs-RGPs_PC00004 - TFs-RGPs_PC00005 - TFs-RGPs_PD00196
	12	b3649	rpoZ	K	DNA-directed RNA polymerase omega subunit
	12	b3987	rpoB	K	DNA-directed RNA polymerase beta subunit	PCs_APORNAP-CPLX - PCs_CPLX0-221 - PCs_CPLX0-222 - PCs_RNAP32-CPLX - PCs_RNAP54-CPLX - PCs_RNAP70-CPLX - PCs_RNAPE-CPLX - PCs_RNAPS-CPLX
	12	b3067	rpoD	K	RNA polymerase sigma factor	PCs_RNAP70-CPLX - TFs-RGPs_PC00010
	12	b1334	fnr	T	transcriptional regulation of aerobic, anaerobic respiration, osmotic balance	TFs-RGPs_PD00197
	12	b1731	cedA	-	cell division activator
	12	b3995	rsd	K	regulator of sigma D
	12	b2319	usg	E	hypothetical protein
	12	b4118	melR	K	regulator of melibiose operon	TFs-RGPs_PC00004 - TFs-RGPs_PD00208
	12	b3406	greB	-	transcription elongation factor GreB
	12	b3989	htrC	-	heat shock protein htrC
	13	b0025	ribF	H	hypothetical protein	PWYS_RIBOSYN2-PWY
	13	b0736	ybgC	R	hypothetical protein	PCs_TOL-PAL-CPLX
	13	b0955	ycbZ	O	putative ATP-dependent protease
	13	b1090	plsX	I	fatty acid/phospholipid synthesis protein
	13	b1091	fabH	I	3-oxoacyl-(acyl carrier protein) synthase	PWYS_FASYN-INITIAL-PWY
	13	b1092	fabD	I	acyl carrier protein S-malonyltransferase	PWYS_FASYN-INITIAL-PWY
	13	b1093	fabG	IQ	3-ketoacyl-(acyl-carrier-protein) reductase	PWYS_FASYN-ELONG-PWY - PWYS_PWY0-862
	13	b1094	acpP	IQ	acyl carrier protein	PWYS_PWY0-501
	13	b1095	fabF	IQ	3-oxoacyl-(acyl carrier protein) synthase	PWYS_FASYN-ELONG-PWY - PWYS_FASYN-INITIAL-PWY
	13	b1096	pabC	EH	4-amino-4-deoxychorismate lyase	PCs_PABSYNMULTI-CPLX - PWYS_FOLSYN-PWY
	13	b2563	acpS	I	4'-phosphopantetheinyl transferase	PWYS_FASYN-INITIAL-PWY
	13	b2836	aas	IQ	2-acyl-glycerophospho-ethanolamine acyltransferase
	13	b3730	glmU	M	bifunctional N-acetylglucosamine-1-phosphate uridyltransferase/glucosamine-1-phosphate acetyltransferase	PWYS_PEPTIDOGLYCANSYN-PWY - PWYS_UDPNAGSYN-PWY - TFs-RGPs_PD00266
	13	b2902	ygfF	IQ	putative oxidoreductase
	13	b3729	glmS	M	D-fructose-6-phosphate amidotransferase	PWYS_UDPNAGSYN-PWY - TFs-RGPs_PD00266
	14	b4059	ssb	L	single-strand DNA-binding protein	TFs-RGPs_PC00010
	14	b0214	rnhA	L	ribonuclease H
	14	b1274	topA	L	DNA topoisomerase I	TFs-RGPs_PD00196
	14	b1763	topB	L	DNA topoisomerase III
	14	b1861	ruvA	L	Holliday junction DNA helicase motor protein	PCs_RUVABC-CPLX
	14	b2011	sbcB	L	exonuclease I, 3' --> 5' specific; deoxyribophosphodiesterase
	14	b3822	recQ	L	ATP-dependent DNA helicase
	14	b2892	recJ	L	ssDNA exonuclease, 5' --> 3' specific
	14	b1652	rnt	L	ribonuclease T
	14	b1759	nudG	L	CTP pyrophosphohydrolase
	14	b1764	selD	E	selenophosphate synthetase	PWYS_PWY0-901
	14	b3935	priA	L	primosome assembly protein PriA
	14	b2894	xerD	L	tyrosine recombinase
	14	b3821	pldA	M	outer membrane phospholipase A
	14	b3825	pldB	I	lysophospholipase L(2)
	15	b0230	mbhA	N	flagellar motor protein
	15	b1890	motA	N	flagellar motor protein	PCs_FLAGELLAR-MOTOR-COMPLEX
	15	b1421	trg	NT	methyl-accepting chemotaxis protein III, ribose and galactose sensor receptor	PCs_TRG-CPLX - PCs_TRG-GLN - PCs_TRG-GLU - PCs_TRG-GLUME
	15	b1884	cheR	NT	chemotactic response, glutamate methyltransferase	PWYS_CHE-PWY
	15	b1887	cheW	NT	positive regulator of CheA protein activity	PCs_TAP-CPLX - PCs_TAP-GLN - PCs_TAP-GLU - PCs_TAP-GLUME - PCs_TAR-CPLX - PCs_TAR-GLN - PCs_TAR-GLU - PCs_TAR-GLUME - PCs_TRG-CPLX - PCs_TRG-GLN - PCs_TRG-GLU - PCs_TRG-GLUME - PCs_TSR-CPLX - PCs_TSR-GLN - PCs_TSR-GLU - PCs_TSR-GLUME
	15	b1888	cheA	NT	chemotactic sensory histidine kinase (soluble) in two-component regulatory system with CheB and CheY, senses chemotactic signal	PCs_TAP-CPLX - PCs_TAP-GLN - PCs_TAP-GLU - PCs_TAP-GLUME - PCs_TAR-CPLX - PCs_TAR-GLN - PCs_TAR-GLU - PCs_TAR-GLUME - PCs_TRG-CPLX - PCs_TRG-GLN - PCs_TRG-GLU - PCs_TRG-GLUME - PCs_TSR-CPLX - PCs_TSR-GLN - PCs_TSR-GLU - PCs_TSR-GLUME - PWYS_CHE-PWY
	15	b4355	tsr	NT	methyl-accepting chemotaxis protein I, serine sensor receptor	PCs_TSR-CPLX - PCs_TSR-GLN - PCs_TSR-GLU - PCs_TSR-GLUME
	15	b1881	cheZ	NT	chemotactic response, CheY protein phophatase
	15	b1882	cheY	T	chemotactic response regulator in two-component regulatory system with CheA, transmits signals to FliM flagelllar motor component	PWYS_CHE-PWY
	15	b1883	cheB	NT	chemotaxis-specific methylesterase	PWYS_CHE-PWY
	15	b1886	tar	NT	methyl-accepting chemotaxis protein II, aspartate sensor receptor	PCs_TAR-CPLX - PCs_TAR-GLN - PCs_TAR-GLU - PCs_TAR-GLUME
	15	b1889	motB	N	flagellar motor protein	PCs_FLAGELLAR-MOTOR-COMPLEX
	15	b1885	tap	NT	methyl-accepting chemotaxis protein IV, peptide sensor receptor	PCs_TAP-CPLX - PCs_TAP-GLN - PCs_TAP-GLU - PCs_TAP-GLUME
	15	b3072	aer	NT	aerotaxis sensor receptor, flavoprotein
	16	b3753	rbsR	K	regulator for rbs operon	TFs-RGPs_PD03867
	16	b3751	rbsB	G	D-ribose periplasmic binding protein	PCs_ABC-28-CPLX - TFs-RGPs_PC00004 - TFs-RGPs_PD03867
	16	b1514	ydeY	G	putative ABC transport system permease protein	PCs_ABC-58-CPLX
	16	b4088	alsB	G	D-allose-binding periplasmic protein	PCs_ABC-42-CPLX - TFs-RGPs_G7821-MONOMER
	16	b4227	ytfQ	G	putative D-ribose transport protein (ABC superfamily, peri_bind)	PCs_ABC-46-CPLX
	16	b1898	--
	16	b2546	yphD	G	putative sugar transport protein (ABC superfamily, membrane)	PCs_ABC-60-CPLX
	16	b3748	rbsD	G	D-ribose high-affinity transport system; membrane-associated protein	TFs-RGPs_PC00004 - TFs-RGPs_PD03867
	16	b3750	rbsC	G	ribose high-affinity ABC transporter permease component	PCs_ABC-28-CPLX - TFs-RGPs_PC00004 - TFs-RGPs_PD03867
	16	b3752	rbsK	G	ribokinase	PWYS_RIBOKIN-PWY - TFs-RGPs_PC00004 - TFs-RGPs_PD03867
	16	b4086	alsC	G	D-allose transport system permease	PCs_ABC-42-CPLX - TFs-RGPs_G7821-MONOMER
	16	b4230	ytfT	G	putative sugar transport protein (ABC superfamily, membrane)	PCs_ABC-46-CPLX
	16	b4231	yjfF	G	putative sugar transport protein (ABC superfamily, membrane)	PCs_ABC-46-CPLX
	16	b4087	alsA	G	D-allose transport ATP-binding protein	PCs_ABC-42-CPLX - TFs-RGPs_G7821-MONOMER
	17	b0823	ybiW	C	putative formate acetyltransferase 3
	17	b0902	pflA	O	pyruvate formate lyase activating enzyme 1
	17	b3952	pflC	O	probable pyruvate formate lyase activating enzyme 2
	17	b4379	yjjW	O	putative activating enzyme
	17	b0903	pflB	C	formate acetyltransferase 1	PWYS_ANARESP1-PWY - PWYS_FERMENTATION-PWY - PWYS_THREOCAT-PWY - TFs-RGPs_ARCA-MONOMER - TFs-RGPs_NARL-MONOMER - TFs-RGPs_PC00004 - TFs-RGPs_PC00027 - TFs-RGPs_PD00197
	17	b2579	yfiD	R	putative formate acetyltransferase	TFs-RGPs_ARCA-MONOMER - TFs-RGPs_EG11088-MONOMER - TFs-RGPs_PD00197
	17	b3114	tdcE	C	probable formate acetyltransferase 3	PWYS_ANARESP1-PWY - PWYS_FERMENTATION-PWY - PWYS_THREOCAT-PWY - TFs-RGPs_PC00004 - TFs-RGPs_PC00027 - TFs-RGPs_PD00268 - TFs-RGPs_PD03292
	17	b3951	pflD	C	formate acetyltransferase 2
	17	b0919	ycbJ	-	hypothetical protein
	17	b3919	tpiA	G	triosephosphate isomerase	PWYS_GLYCOLYSIS
	17	b1066	rimJ	J	acetylation of N-terminal alanine of 30S ribosomal subunit protein S5
	17	b1127	pepT	E	peptidase T
	17	b3866	yihI	S	hypothetical protein
	17	b3745	yieM	R	hypothetical protein
	18	b0115	aceF	C	dihydrolipoamide acetyltransferase	PCs_PYRUVATEDEH-CPLX - PWYS_ANARESP1-PWY - PWYS_GLYOXDEG-PWY - PWYS_PYRUVDEHYD-PWY - TFs-RGPs_EG11088-MONOMER - TFs-RGPs_PC00004 - TFs-RGPs_PD00197
	18	b0113	pdhR	K	transcriptional regulator of pyruvate dehydrogenase complex	TFs-RGPs_EG11088-MONOMER - TFs-RGPs_PC00004 - TFs-RGPs_PD00197
	18	b0304	ykgC	C	pyridine nucleotide-disulfide oxidoreductase
	18	b3500	gor	C	glutathione reductase	PWYS_GLUT-REDOX-PWY
	18	b3962	udhA	C	soluble pyridine nucleotide transhydrogenase
	18	b3417	malP	G	maltodextrin phosphorylase	PWYS_GLYCOCAT-PWY - TFs-RGPs_PC00004 - TFs-RGPs_PD00237
	18	b0219	yafV	R	putative EC 3.5. amidase-type enzyme
	18	b0686	ybfF	R	putative enzyme
	18	b0969	yccK	P	putative sulfite reductase
	18	b2159	nfo	L	endonuclease IV	TFs-RGPs_PD00365 - TFs-RGPs_PD00406 - TFs-RGPs_PD04418
	18	b2349	intS	L	CPS-53 (KpLE1) prophage; Sf6-like integrase
	18	b2622	intA	LO	CP4-57 prophage; integrase
	18	b4327	yjiE	K	putative transcriptional regulator (LysR family)
	19	b0811	glnH	ET	glutamine ABC transporter periplasmic-binding protein	PCs_ABC-12-CPLX - TFs-RGPs_GLNG-CPLX - TFs-RGPs_PC00027
	19	b0860	artJ	ET	arginine 3rd transport system periplasmic binding protein	PCs_ABC-4-CPLX
	19	b0863	artI	ET	arginine 3rd transport system periplasmic binding protein	PCs_ABC-4-CPLX
	19	b0864	artP	E	ATP-binding component of 3rd arginine transport system	PCs_ABC-4-CPLX
	19	b1920	fliY	ET	cysteine transport protein (ABC superfamily, peri_bind)	TFs-RGPs_EG10320-MONOMER - TFs-RGPs_PD00288
	19	b2309	hisJ	ET	histidine transport protein (ABC superfamily, peri_bind)	PCs_ABC-14-CPLX - TFs-RGPs_GLNG-CPLX
	19	b2310	argT	ET	lysine-, arginine-, ornithine-binding periplasmic protein	PCs_ABC-3-CPLX - TFs-RGPs_GLNG-CPLX
	19	b4106	phnC	P	ATP-binding component of phosphonate transport	PCs_ABC-23-CPLX - TFs-RGPs_PHOB-MONOMER
	19	b0861	artM	E	arginine 3rd transport system permease protein	PCs_ABC-4-CPLX
	19	b0862	artQ	E	arginine 3rd transport system permease protein	PCs_ABC-4-CPLX
	19	b2307	hisM	E	histidine and lysine/arginine/ornithine transport protein (ABC superfamily, membrane)	PCs_ABC-14-CPLX - PCs_ABC-3-CPLX - TFs-RGPs_GLNG-CPLX
	19	b2308	hisQ	E	histidine and lysine/arginine/ornithine transport system (ABC superfamily, membrane)	PCs_ABC-14-CPLX - PCs_ABC-3-CPLX - TFs-RGPs_GLNG-CPLX
	19	b1921	fliZ	-	putative regulator of FliA	TFs-RGPs_EG10320-MONOMER - TFs-RGPs_PD00288
	20	b0023	rpsT	J	30S ribosomal protein S20
	20	b3303	rpsE	J	30S ribosomal protein S5
	20	b3307	rpsN	J	30S ribosomal protein S14
	20	b3306	rpsH	J	30S ribosomal protein S8
	20	b4202	rpsR	J	30S ribosomal protein S18
	20	b0423	thiI	HP	thiamine biosynthesis protein ThiI
	20	b3342	rpsL	J	30S ribosomal protein S12
	20	b2140	yohI	J	conserved protein, FMN-linked
	20	b2584	yfiQ	KC	putative acyl-CoA synthetase, NAD(P)-binding, ATP-binding
	20	b4191	yjfQ	KG	putative DEOR-type transcriptional regulator	TFs-RGPs_G7854-MONOMER
	20	b3302	rpmD	J	50S ribosomal protein L30
	20	b4178	yjeB	K	conserved protein, Winged helix domain
	21	b0140	ecpD	NU	probable pilin chaperone similar to PapD	TFs-RGPs_PC00027
	21	b0531	sfmC	NU	putative chaperone
	21	b0717	ybgP	NU	putative chaperone
	21	b0939	ycbR	NU	putative fimbrial chaperone
	21	b2110	yehC	NU	putative chaperone
	21	b2336	yfcS	NU	putative chaperone
	21	b3047	yqiH	NU	putative periplasmic chaperone
	21	b4316	fimC	NU	periplasmic chaperone, required for type 1 fimbriae	TFs-RGPs_PC00027 - TFs-RGPs_PD00288 - TFs-RGPs_PD00353
	21	b3143	yraI	NU	putative chaperone
	21	b4313	fimE	L	recombinase involved in phase variation; regulator for fimA	TFs-RGPs_PD00288 - TFs-RGPs_PD00353
	21	b4314	fimA	NU	major type 1 subunit fimbrin (pilin)	PCs_CPLX0-3401 - TFs-RGPs_PC00027 - TFs-RGPs_PD00288 - TFs-RGPs_PD00353
	21	b4315	fimI	NU	fimbrial protein	TFs-RGPs_PC00027 - TFs-RGPs_PD00288 - TFs-RGPs_PD00353
	22	b0652	gltL	E	ATP-binding protein of glutamate/aspartate transport system	PCs_ABC-13-CPLX
	22	b0654	gltJ	E	glutamate/aspartate transport protein (ABC superfamily, membrane)	PCs_ABC-13-CPLX
	22	b1918	yecS	E	putative amino acid transport protein (ABC superfamily, membrane)
	22	b0653	gltK	E	glutamate/aspartate transport protein (ABC superfamily, membrane)	PCs_ABC-13-CPLX
	22	b0655	gltI	ET	glutamate/aspartate periplasmic binding protein
	22	b0809	glnQ	E	glutamine ABC transporter ATP-binding component	PCs_ABC-12-CPLX - TFs-RGPs_GLNG-CPLX - TFs-RGPs_PC00027
	22	b1917	yecC	E	putative ATP-binding component of a transport system
	22	b2306	hisP	E	ATP-binding component of histidine transport	PCs_ABC-14-CPLX - PCs_ABC-3-CPLX - TFs-RGPs_GLNG-CPLX
	22	b3269	yhdX	E	putative amino acid transport protein (ABC superfamily, membrane)	PCs_ABC-52-CPLX - TFs-RGPs_GLNG-CPLX
	22	b3271	yhdZ	E	putative ATP-binding component of a transport system	PCs_ABC-52-CPLX - TFs-RGPs_GLNG-CPLX
	22	b3270	yhdY	E	putative amino acid transport protein (ABC superfamily, membrane)	PCs_ABC-52-CPLX - TFs-RGPs_GLNG-CPLX
	22	b0810	glnP	E	glutamine ABC transporter permease component	PCs_ABC-12-CPLX - TFs-RGPs_GLNG-CPLX - TFs-RGPs_PC00027
	23	b0829	yliA	R	putative ATP-binding component of a transport system	PCs_ABC-49-CPLX
	23	b1246	oppD	EP	oligopeptide transporter ATP-binding component	PCs_ABC-22-CPLX - TFs-RGPs_PD00353
	23	b1247	oppF	E	homolog of Salmonella ATP-binding protein of oligopeptide ABC transport system	PCs_ABC-22-CPLX - TFs-RGPs_PD00353
	23	b1483	yddO	EP	putative ABC transport system ATP-binding protein	PCs_ABC-59-CPLX - TFs-RGPs_GLNG-CPLX
	23	b1484	yddP	EP	putative ABC transport system ATP-binding protein	PCs_ABC-59-CPLX - TFs-RGPs_GLNG-CPLX
	23	b3479	nikD	EP	ATP-binding protein of nickel transport system	PCs_ABC-20-CPLX - TFs-RGPs_EG11519-MONOMER - TFs-RGPs_PD00197
	23	b3540	dppF	E	dipeptide transport protein (ABC superfamily, atp_bind)	PCs_ABC-8-CPLX - TFs-RGPs_PC00027
	23	b3541	dppD	EP	dipeptide transport protein (ABC superfamily, atp_bind)	PCs_ABC-8-CPLX - TFs-RGPs_PC00027
	23	b4097	phnK	P	ATP-binding component of phosphonate transport	TFs-RGPs_PHOB-MONOMER
	23	b1292	sapC	V	homolog of Salmonella peptide transport permease protein	PCs_ABC-29-CPLX
	23	b2180	yejF	R	putative ATP-binding component of a transport system	PCs_ABC-41-CPLX
	23	b4096	phnL	P	ATP-binding component of phosphonate transport	TFs-RGPs_PHOB-MONOMER
	24	b1224	narG	C	nitrate reductase 1, alpha subunit	PCs_CPLX0-3261 - PCs_NITRATREDUCTA-CPLX - TFs-RGPs_NARL-MONOMER - TFs-RGPs_PC00027 - TFs-RGPs_PD00197
	24	b0437	clpP	OU	ATP-dependent Clp protease proteolytic subunit	PCs_CPLX0-3104 - PCs_CPLX0-3107 - PCs_CPLX0-3108
	24	b1468	narZ	C	cryptic nitrate reductase 2 alpha subunit	PCs_NITRATREDUCTZ-CPLX
	24	b1223	narK	P	nitrite extrusion protein	TFs-RGPs_NARL-MONOMER - TFs-RGPs_PC00027 - TFs-RGPs_PD00197
	24	b1225	narH	C	nitrate reductase 1, Fe-S (beta) subunit	PCs_CPLX0-3261 - PCs_NITRATREDUCTA-CPLX - TFs-RGPs_NARL-MONOMER - TFs-RGPs_PC00027 - TFs-RGPs_PD00197
	24	b1227	narI	C	nitrate reductase 1, cytochrome b(NR), gamma subunit	PCs_NITRATREDUCTA-CPLX - TFs-RGPs_NARL-MONOMER - TFs-RGPs_PC00027 - TFs-RGPs_PD00197
	24	b1469	narU	P	nitrate extrusion protein (MFS family)
	24	b1465	narV	C	cryptic nitrate reductase 2 gamma subunit	PCs_NITRATREDUCTZ-CPLX
	24	b1467	narY	C	cryptic nitrate reductase 2 beta subunit	PCs_NITRATREDUCTZ-CPLX
	24	b1226	narJ	C	nitrate reductase 1, delta subunit, assembly function	TFs-RGPs_NARL-MONOMER - TFs-RGPs_PC00027 - TFs-RGPs_PD00197
	24	b1466	narW	C	cryptic nitrate reductase 2 delta subunit
	25	b0731	hrsA	GT	PTS family enzyme IIA (N-terminal); enzyme IIBC (C-terminal), induction of ompC	PCs_CPLX-163 - TFs-RGPs_PC00103
	25	b1723	pfkB	G	6-phosphofructokinase II	PWYS_GALACTITOLCAT-PWY - PWYS_GLYCOLYSIS - PWYS_MANNIDEG-PWY - PWYS_SORBDEG-PWY
	25	b2168	fruK	G	1-phosphofructokinase	TFs-RGPs_PC00061
	25	b2167	fruA	G	PTS family enzyme IIB'BC, fructose-specific	PCs_CPLX-158 - TFs-RGPs_PC00061
	25	b2386	ypdG	G	putative PTS family enzyme IIC component, fructose-specific
	25	b2735	ygbI	KG	putative DEOR-type transcriptional regulator
	25	b3899	frvB	G	PTS family enzyme IIBC, fructose-specific	PCs_CPLX-159
	25	b3949	frwC	G	PTS family enzyme IIC, fructose-mannitol-specific	PCs_CPLX-160
	25	b3950	frwB	G	PTS family enzyme IIB, fructose-mannitol-specific	PCs_CPLX-160
	25	b2169	fruB	G	PTS family enzyme IIA (N-terminal); FPr (C-terminal), fructose-specific	PCs_CPLX-158 - TFs-RGPs_PC00061
	25	b2387	ypdH	G	putative PTS family enzyme IIB component
	26	b0184	dnaE	L	DNA polymerase III subunit alpha	PCs_CPLX0-2361
	26	b0470	dnaX	L	DNA polymerase III subunits gamma and tau
	26	b0640	holA	L	DNA polymerase III subunit delta
	26	b0215	dnaQ	L	DNA polymerase III subunit epsilon	PCs_CPLX0-2361
	26	b1099	holB	L	DNA polymerase III subunit delta
	26	b0416	nusB	K	transcription antitermination protein NusB
	26	b4259	holC	L	DNA polymerase III subunit chi
	26	b1842	holE	-	DNA polymerase III, theta subunit	PCs_CPLX0-2361
	26	b4372	holD	L	DNA polymerase III subunit psi
	26	b2607	trmD	J	tRNA (guanine-N(1)-)-methyltransferase
	27	b3733	atpG	C	ATP synthase subunit C	PCs_ATPSYN-CPLX - PCs_F-1-CPLX
	27	b3734	atpA	C	ATP synthase subunit A	PCs_ATPSYN-CPLX - PCs_F-1-CPLX
	27	b1323	tyrR	KE	transcriptional regulation of aroF, aroG, tyrA and aromatic amino acid transport	TFs-RGPs_PD00413
	27	b2155	cirA	P	outer membrane pore protein, receptor for colicin I, requires TonB	TFs-RGPs_PC00004 - TFs-RGPs_PC00009 - TFs-RGPs_PD00260
	27	b3738	atpB	C	ATP synthase subunit A	PCs_ATPSYN-CPLX - PCs_F-O-CPLX
	27	b3731	atpC	C	ATP synthase subunit epsilon	PCs_ATPSYN-CPLX - PCs_F-1-CPLX
	27	b3735	atpH	C	ATP synthase subunit D	PCs_ATPSYN-CPLX - PCs_F-1-CPLX
	27	b3736	atpF	C	ATP synthase subunit B	PCs_ATPSYN-CPLX - PCs_F-O-CPLX
	27	b3737	atpE	C	ATP synthase subunit C	PCs_ATPSYN-CPLX - PCs_F-O-CPLX
	27	b3739	atpI	C	ATP synthase subunit I
	28	b0399	phoB	TK	positive response regulator for pho regulon, sensor is PhoR (or CreC)	PWYS_CRE-PWY - PWYS_PHOR-PWY - TFs-RGPs_PHOB-MONOMER
	28	b1609	rstB	T	sensor histidine protein kinase (RstA regulator)	PWYS_RST-PWY
	28	b3911	cpxA	T	two-component sensor protein	PWYS_CPX-PWY
	28	b4398	creB	TK	catabolic regulation response regulator	PWYS_CRE-PWY
	28	b1608	rstA	TK	response regulator (activator) in two-component regulatory system with RstB (OmpR family)	PWYS_RST-PWY
	28	b1969	yedW	TK	putative 2-component transcriptional regulator
	28	b2079	baeR	TK	response regulator in two-component regulatory system with BaeS (OmpR family)	PWYS_BAE-PWY
	28	b3912	cpxR	TK	response regulator in two-component regulatory system with CpxA, regulates expression of stress-related genes (OmpR family)	PWYS_CPX-PWY - TFs-RGPs_CPXR-MONOMER
	28	b2078	baeS	T	sensor protein (for BaeR)	PWYS_BAE-PWY
	28	b4397	creA	S	hypothetical protein
	29	b0894	dmsA	C	anaerobic dimethyl sulfoxide (DMSO) reductase, subunit A	PCs_DIMESULFREDUCT-CPLX - PWYS_ANARESPACC-PWY - TFs-RGPs_MONOMER0-185 - TFs-RGPs_NARL-MONOMER - TFs-RGPs_PC00027 - TFs-RGPs_PD00197
	29	b0429	cyoD	C	cytochrome o ubiquinol oxidase subunit IV	PCs_CYT-O-UBIOX-CPLX - TFs-RGPs_ARCA-MONOMER - TFs-RGPs_EG11544-MONOMER - TFs-RGPs_PD00197
	29	b1588	ynfF	C	putative dimethyl sulfoxide reductase, major subunit	PCs_CPLX0-1601 - PWYS_ANARESPACC-PWY
	29	b0896	dmsC	R	anaerobic dimethyl sulfoxide (DMSO) reductase, subunit C	PCs_DIMESULFREDUCT-CPLX - PWYS_ANARESPACC-PWY - TFs-RGPs_MONOMER0-185 - TFs-RGPs_NARL-MONOMER - TFs-RGPs_PC00027 - TFs-RGPs_PD00197
	29	b1587	ynfE	C	putative dimethyl sulfoxide reductase, major subunit	PCs_CPLX0-1601 - PWYS_ANARESPACC-PWY
	29	b0895	dmsB	C	anaerobic dimethyl sulfoxide (DMSO) reductase, subunit B	PCs_DIMESULFREDUCT-CPLX - PWYS_ANARESPACC-PWY - TFs-RGPs_MONOMER0-185 - TFs-RGPs_NARL-MONOMER - TFs-RGPs_PC00027 - TFs-RGPs_PD00197
	29	b1589	ynfG	C	putative dimethyl sulfoxide reductase, Fe-S subunit	PCs_CPLX0-1601 - PWYS_ANARESPACC-PWY
	29	b1591	ynfI	R	putative dimethyl sulfoxide reductase component
	29	b1590	ynfH	R	putative dimethyl sulfoxide reductase, anchor subunit	PCs_CPLX0-1601 - PWYS_ANARESPACC-PWY
	30	b1623	add	F	adenosine deaminase	PWYS_SALVADEHYPOX-PWY
	30	b2096	gatY	G	tagatose 1,6-diphosphate aldolase	PCs_CPLX0-241 - PWYS_GALACTITOLCAT-PWY - TFs-RGPs_PC00063
	30	b3418	malT	K	transcriptional regulator MalT	TFs-RGPs_PC00004 - TFs-RGPs_PD00237 - TFs-RGPs_PD00353 - TFs-RGPs_PD01896
	30	b2095	gatZ	G	putative tagatose 6-phosphate kinase 1	PCs_CPLX0-241 - PWYS_GALACTITOLCAT-PWY - TFs-RGPs_PC00063
	30	b3251	mreB	D	regulator of ftsI, penicillin binding protein 3, septation function
	30	b3249	mreD	M	rod shape-determining protein
	30	b3250	mreC	M	rod shape-determining protein
	30	b3686	ibpB	O	heat shock protein	TFs-RGPs_PC00027
	30	b3687	ibpA	O	heat shock protein
	31	b2286	nuoC	C	NADH dehydrogenase I chain C, D	PCs_CPLX0-3362 - PCs_NADH-DHI-CPLX - PWYS_AERESPDON-PWY - PWYS_ANARESPDON-PWY - TFs-RGPs_ARCA-MONOMER - TFs-RGPs_NARL-MONOMER - TFs-RGPs_PC00027 - TFs-RGPs_PD00196 - TFs-RGPs_PD00197
	31	b2282	nuoH	C	NADH dehydrogenase subunit H	PCs_NADH-DHI-CPLX - PWYS_AERESPDON-PWY - PWYS_ANARESPDON-PWY - TFs-RGPs_ARCA-MONOMER - TFs-RGPs_NARL-MONOMER - TFs-RGPs_PC00027 - TFs-RGPs_PD00196 - TFs-RGPs_PD00197
	31	b2487	hyfG	C	hydrogenase 4 subunit	PCs_CPLX0-249 - PCs_CPLX0-250 - TFs-RGPs_G7308-MONOMER - TFs-RGPs_PC00004 - TFs-RGPs_PD00197 - TFs-RGPs_PD02936
	31	b2721	hycE	C	hydrogenase 3, large subunit (part of FHL complex)	PCs_FHLMULTI-CPLX - PCs_HYDROG3-CPLX - PWYS_ANARESP1-PWY - PWYS_FERMENTATION-PWY - TFs-RGPs_MONOMER0-185 - TFs-RGPs_PC00027 - TFs-RGPs_PD02936
	31	b2281	nuoI	C	NADH dehydrogenase subunit I	PCs_CPLX0-3362 - PCs_NADH-DHI-CPLX - PWYS_AERESPDON-PWY - PWYS_ANARESPDON-PWY - TFs-RGPs_ARCA-MONOMER - TFs-RGPs_NARL-MONOMER - TFs-RGPs_PC00027 - TFs-RGPs_PD00196 - TFs-RGPs_PD00197
	31	b2287	nuoB	C	NADH dehydrogenase beta subunit	PCs_CPLX0-3362 - PCs_NADH-DHI-CPLX - PWYS_AERESPDON-PWY - PWYS_ANARESPDON-PWY - TFs-RGPs_ARCA-MONOMER - TFs-RGPs_NARL-MONOMER - TFs-RGPs_PC00027 - TFs-RGPs_PD00196 - TFs-RGPs_PD00197
	31	b2489	hyfI	C	hydrogenase 4 Fe-S subunit	PCs_CPLX0-249 - PCs_CPLX0-250 - TFs-RGPs_G7308-MONOMER - TFs-RGPs_PC00004 - TFs-RGPs_PD00197 - TFs-RGPs_PD02936
	31	b2719	hycG	C	hydrogenase activity	PCs_FHLMULTI-CPLX - PCs_HYDROG3-CPLX - PWYS_ANARESP1-PWY - PWYS_FERMENTATION-PWY - TFs-RGPs_MONOMER0-185 - TFs-RGPs_PC00027 - TFs-RGPs_PD02936
	31	b2720	hycF	C	hydrogenase 4 Fe-S subunit	PCs_FHLMULTI-CPLX - PCs_HYDROG3-CPLX - PWYS_ANARESP1-PWY - PWYS_FERMENTATION-PWY - TFs-RGPs_MONOMER0-185 - TFs-RGPs_PC00027 - TFs-RGPs_PD02936
	32	b4035	malK	G	ATP-binding component of transport system for maltose	PCs_ABC-16-CPLX - PCs_CPLX0-2101 - TFs-RGPs_PC00004 - TFs-RGPs_PD00237
	32	b4036	lamB	G	maltoporin precursor	PCs_CPLX0-2101 - TFs-RGPs_PC00004 - TFs-RGPs_PD00237
	32	b1311	ycjO	G	putative binding-protein dependent transport protein	PCs_ABC-55-CPLX
	32	b1312	ycjP	G	putative transport protein (ABC superfamily, membrane)	PCs_ABC-55-CPLX
	32	b3451	ugpE	G	sn-glycerol 3-phosphate transport protein (ABC superfamily, membrane)	PCs_ABC-34-CPLX - TFs-RGPs_PC00004 - TFs-RGPs_PHOB-MONOMER
	32	b4032	malG	G	maltose transport protein (ABC superfamily, membrane)	PCs_ABC-16-CPLX - PCs_CPLX0-2101 - TFs-RGPs_PC00004 - TFs-RGPs_PD00237
	32	b4033	malF	G	maltose transport protein (ABC superfamily, membrane)	PCs_ABC-16-CPLX - PCs_CPLX0-2101 - TFs-RGPs_PC00004 - TFs-RGPs_PD00237
	32	b4034	malE	G	periplasmic maltose-binding protein	PCs_ABC-16-CPLX - PCs_CPLX0-2101 - TFs-RGPs_PC00004 - TFs-RGPs_PD00237
	32	b4037	malM	-	periplasmic protein of mal regulon	TFs-RGPs_PC00004 - TFs-RGPs_PD00237
	33	b0066	yabJ	H	putative ATP-binding component of a transport system	PCs_ABC-32-CPLX
	33	b2423	cysW	-	sulfate transport system permease W protein	PCs_ABC-7-CPLX - PCs_ABC-70-CPLX - TFs-RGPs_PC00040
	33	b2422	cysA	P	ATP-binding component of sulfate permease A protein; chromate resistance	PCs_ABC-7-CPLX - PCs_ABC-70-CPLX - TFs-RGPs_PC00040
	33	b0855	potG	E	ATP-binding component of putrescine transport system	PCs_ABC-25-CPLX - TFs-RGPs_GLNG-CPLX
	33	b1756	ynjD	R	putative ATP-binding component of a transport system	PCs_ABC-48-CPLX
	33	b2129	yehX	E	putative ATP-binding component of a transport system	PCs_ABC-40-CPLX
	33	b2421	cysM	E	cysteine synthase B (O-acetylserine sulfhydrolase B)	TFs-RGPs_PC00040
	33	b2425	cysP	P	thiosulfate binding protein	PCs_ABC-7-CPLX - TFs-RGPs_PC00040
	33	b2424	cysU	O	sulfate, thiosulfate transport system permease T protein	PCs_ABC-7-CPLX - PCs_ABC-70-CPLX - TFs-RGPs_PC00040
	34	b0119	yacL	S	hypothetical protein
	34	b0123	cueO	Q	Probable periplasmic copper oxidase	TFs-RGPs_G6263-MONOMER
	34	b0465	kefA	M	component of the MscS mechanosensitive channel
	34	b0683	fur	P	ferric uptake regulator	TFs-RGPs_PC00004 - TFs-RGPs_PC00009 - TFs-RGPs_PD00214 - TFs-RGPs_PD00260 - TFs-RGPs_PD00406
	34	b2018	hisL	-	his operon leader peptide
	34	b2183	rsuA	J	16S pseudouridylate 516 synthase
	34	b3357	crp	T	cyclic AMP receptor protein	TFs-RGPs_PC00004
	34	b3982	nusG	K	transcription antitermination protein NusG
	34	b2616	recN	L	protein used in recombination and DNA repair
	35	b0139	htrE	NU	probable outer membrane porin protein involved in fimbrial assembly	TFs-RGPs_PC00027
	35	b0532	sfmD	NU	putative outer membrane protein
	35	b0940	ycbS	NU	putative outer membrane usher protein
	35	b2109	yehB	NU	putative outer membrane protein
	35	b3216	yhcD	NU	putative outer membrane protein
	35	b4317	fimD	NU	outer membrane protein; export and assembly of type 1 fimbriae, interrupted	TFs-RGPs_PC00027 - TFs-RGPs_PD00288 - TFs-RGPs_PD00353
	35	b0718	ybgQ	NU	putative outer membrane protein
	35	b3046	yqiG	NU	putative outer membrane usher protein
	35	b3144	yraJ	NU	putative outer membrane protein
	36	b4171	miaA	J	tRNA delta(2)-isopentenylpyrophosphate transferase
	36	b1960	vsr	L	DNA mismatch endonuclease, patch repair protein
	36	b4170	mutL	L	DNA mismatch repair protein	PCs_MUTHLS-CPLX
	36	b2733	mutS	L	DNA mismatch repair protein	PCs_MUTHLS-CPLX
	36	b4162	orn	A	oligoribonuclease
	36	b4169	amiB	M	N-acetylmuramoyl-l-alanine amidase II, a murein hydrolase
	36	b4173	hflX	R	GTP - binding subunit of protease specific for phage lambda cII repressor
	36	b4174	hflK	O	protease specific for phage lambda cII repressor	PCs_CPLX0-1321 - PCs_CPLX0-2982
	36	b4175	hflC	O	protease specific for phage lambda cII repressor	PCs_CPLX0-1321 - PCs_CPLX0-2982
	37	b2024	hisA	E	1-(5-phosphoribosyl)-5-[(5-phosphoribosylamino)methylideneamino] imidazole-4-carboxamide isomerase	PWYS_HISTSYN-PWY
	37	b2021	hisC	E	histidinol-phosphate aminotransferase	PWYS_HISTSYN-PWY
	37	b2019	hisG	E	ATP phosphoribosyltransferase	PWYS_HISTSYN-PWY
	37	b2020	hisD	E	histidinol dehydrogenase	PWYS_HISTSYN-PWY
	37	b2022	hisB	E	imidazole glycerol-phosphate dehydratase/histidinol phosphatase	PWYS_HISTSYN-PWY
	37	b2023	hisH	E	imidazole glycerol phosphate synthase subunit HisH	PCs_GLUTAMIDOTRANS-CPLX - PWYS_HISTSYN-PWY
	37	b2025	hisF	E	imidazole glycerol phosphate synthase subunit HisF	PCs_GLUTAMIDOTRANS-CPLX - PWYS_HISTSYN-PWY
	37	b2026	hisI	E	bifunctional phosphoribosyl-AMP cyclohydrolase/phosphoribosyl-ATP pyrophosphatase protein	PWYS_HISTSYN-PWY
	38	b0081	yabB	S	hypothetical protein
	38	b0116	lpdA	C	dihydrolipoamide dehydrogenase	PCs_2OXOGLUTARATEDEH-CPLX - PCs_GCVMULTI-CPLX - PCs_PYRUVATEDEH-CPLX - PWYS_1CMET2-PWY - PWYS_ANARESP1-PWY - PWYS_GLYCLEAV-PWY - PWYS_GLYOXDEG-PWY - PWYS_PYRUVDEHYD-PWY - PWYS_TCA - TFs-RGPs_ARCA-MONOMER - TFs-RGPs_EG11088-MONOMER - TFs-RGPs_PC00004 - TFs-RGPs_PD00196 - TFs-RGPs_PD00197
	38	b0144	yadB	J	glutamyl-tRNA synthetase
	38	b4058	uvrA	L	excinuclease ABC subunit A	PCs_UVRABC-CPLX - TFs-RGPs_PC00010
	38	b0637	ybeB	S	hypothetical protein
	38	b2804	fucU	G	conserved protein of fucose operon	TFs-RGPs_PC00004 - TFs-RGPs_PD00444
	38	b2865	ygeR	M	putative lipoprotein
	38	b4306	yjhP	Q	KpLE2 phage-like element; putative methyltransferase
	39	b3619	rfaD	MG	ADP-L-glycero-D-mannoheptose-6-epimerase
	39	b0459	maa	R	maltose O-acetyltransferase
	39	b0866	ybjQ	S	hypothetical protein
	39	b1685	ydiH	-	unknown CDS
	39	b3620	rfaF	M	ADP-heptose--lps heptosyltransferase II; lipopolysaccharide core biosynthesis
	39	b1809	yoaB	J	hypothetical protein
	39	b2888	ygfU	F	putative permease
	39	b3198	yrbI	R	3-deoxy-D-manno-octulosonate 8-phosphate phosphatase	PWYS_KDOSYN-PWY
	40	b0740	tolB	U	translocation protein TolB precursor	PCs_CPLX0-2201 - PCs_CPLX0-2202 - PCs_CPLX0-2221 - PCs_TOL-PAL-CPLX
	40	b0738	tolR	U	putative inner membrane protein, involved in the tonB-independent uptake of group A colicins	PCs_CPLX0-2201 - PCs_CPLX0-2202 - PCs_CPLX0-2221 - PCs_TOL-PAL-CPLX
	40	b0739	tolA	M	cell envelope integrity inner membrane protein TolA	PCs_CPLX0-2201 - PCs_CPLX0-2202 - PCs_CPLX0-2221 - PCs_TOL-PAL-CPLX
	40	b0737	tolQ	U	inner membrane protein required for outer membrane integrity, uptake of group A colicins and phage DNA	PCs_CPLX0-2201 - PCs_CPLX0-2202 - PCs_CPLX0-2221 - PCs_TOL-PAL-CPLX
	40	b0741	pal	M	peptidoglycan-associated lipoprotein	PCs_CPLX0-2201 - PCs_CPLX0-2202 - PCs_CPLX0-2221 - PCs_TOL-PAL-CPLX
	40	b0742	ybgF	S	putative periplasmic protein	PCs_CPLX0-2201 - PCs_CPLX0-2202 - PCs_CPLX0-2221 - PCs_TOL-PAL-CPLX
	40	b1677	lpp	M	murein lipoprotein
	40	b1863	ruvC	L	Holliday junction resolvase	PCs_RUVABC-CPLX
	41	b0658	ybeX	P	putative integral membrane protein
	41	b0514	glxK	G	glycerate kinase	PWYS_GLYCOLATEMET-PWY - PWYS_PWY0-41
	41	b1725	yniA	G	conserved protein, protein kinase-like
	41	b3052	rfaE	M	bifunctional ADP-L-glycero-D-manno-heptose synthase: putaive kinase (N-terminal); putative sugar nucleotide transferase (C-terminal)
	41	b3279	yrdA	R	putative acyl transferase, ferripyochelin-binding
	41	b4346	mcrB	V	component of 5-methylcytosine-specific restriction enzyme McrBC	PCs_CPLX0-2661
	41	b2878	ygfK	E	putative oxidoreductase, Fe-S subunit	PCs_CPLX0-1841
	41	b4345	mcrC	V	component of 5-methylcytosine-specific restriction enzyme McrBC	PCs_CPLX0-2661
	42	b0854	potF	E	periplasmic putrescine-binding protein; permease protein	PCs_ABC-25-CPLX - TFs-RGPs_GLNG-CPLX
	42	b0856	potH	E	putrescine transport protein (ABC superfamily, membrane)	PCs_ABC-25-CPLX - TFs-RGPs_GLNG-CPLX
	42	b0857	potI	E	putrescine transport protein (ABC superfamily, membrane)	PCs_ABC-25-CPLX - TFs-RGPs_GLNG-CPLX
	42	b1124	potC	E	spermidine/putrescine ABC transporter membrane component	PCs_ABC-24-CPLX
	42	b1125	potB	E	spermidine/putrescine ABC transporter membrane component	PCs_ABC-24-CPLX
	42	b1442	ydcU	E	putative ABC transporter permease protein	PCs_ABC-51-CPLX
	42	b1123	potD	E	spermidine/putrescine ABC transporter periplasmic substrate-binding component	PCs_ABC-24-CPLX
	42	b1126	potA	E	putrescine/spermidine ABC transporter ATPase	PCs_ABC-24-CPLX
	43	b0693	speF	E	ornithine decarboxylase isozyme, inducible
	43	b0186	ldcC	E	lysine decarboxylase 2, constitutive	PWYS_PWY0-461
	43	b4131	cadA	E	lysine decarboxylase 1	PWYS_PWY0-461 - TFs-RGPs_ARCA-MONOMER - TFs-RGPs_EG11544-MONOMER - TFs-RGPs_EG12243-MONOMER - TFs-RGPs_PD00288 - TFs-RGPs_PD00436
	43	b2965	speC	E	ornithine decarboxylase isozyme	PWYS_POLYAMSYN-PWY - TFs-RGPs_PC00004
	43	b3746	yieN	R	putative 2-component regulator
	43	b4132	cadB	E	lysine/cadaverine transport protein (APC family)	TFs-RGPs_ARCA-MONOMER - TFs-RGPs_EG11544-MONOMER - TFs-RGPs_EG12243-MONOMER - TFs-RGPs_PD00288 - TFs-RGPs_PD00436
	43	b4133	cadC	K	transcriptional activator of cad operon	TFs-RGPs_PD00436
	44	b3986	rplL	J	50S ribosomal protein L7/L12
	44	b0082	mraW	M	S-adenosyl-methyltransferase
	44	b0473	htpG	O	heat shock protein 90
	44	b0891	lolA	M	outer-membrane lipoprotein carrier protein precursor
	44	b3966	btuB	H	outer membrane porin: vitamin B12/cobalamin transport, receptor for E colicins, bacteriophage BF23	PCs_CPLX0-1862 - PCs_CPLX0-1924 - PCs_CPLX0-2221
	44	b4161	yjeQ	R	ribosome-associated GTPase
	44	b4336	yjiN	S	putative transmembrane protein
	45	b3771	ilvD	EG	dihydroxy-acid dehydratase	PWYS_ILEUSYN-PWY - PWYS_VALSYN-PWY - TFs-RGPs_PC00027 - TFs-RGPs_PD00353
	45	b3774	ilvC	EH	ketol-acid reductoisomerase	PWYS_ILEUSYN-PWY - PWYS_VALSYN-PWY - TFs-RGPs_PD00200
	45	b0078	ilvH	E	acetolactate synthase small subunit	PCs_ACETOLACTSYNIII-CPLX - PWYS_ILEUSYN-PWY - PWYS_VALSYN-PWY - TFs-RGPs_PD00353
	45	b3767	--			TFs-RGPs_PC00027 - TFs-RGPs_PD00353
	45	b3772	ilvA	E	threonine dehydratase	PWYS_ILEUSYN-PWY - TFs-RGPs_PC00027 - TFs-RGPs_PD00353
	45	b0077	ilvI	EH	acetolactate synthase III large subunit	PCs_ACETOLACTSYNIII-CPLX - PWYS_ILEUSYN-PWY - PWYS_VALSYN-PWY - TFs-RGPs_PD00353
	45	b3773	ilvY	K	positive regulator for ilvC	TFs-RGPs_PD00200
	46	b3041	ribB	H	3,4-dihydroxy-2-butanone 4-phosphate synthase	PWYS_RIBOSYN2-PWY
	46	b0414	ribD	H	bifunctional: diaminohydroxyphosphoribosylaminopyrimidine deaminase (N-terminal); 5-amino-6-(5-phosphoribosylamino) uracil reductase	PWYS_RIBOSYN2-PWY
	46	b0415	ribH	H	riboflavin synthase subunit beta	PWYS_RIBOSYN2-PWY
	46	b1251	yciI	S	hypothetical protein
	46	b1277	ribA	H	GTP cyclohydrolase II protein	PWYS_RIBOSYN2-PWY - TFs-RGPs_PD00406
	46	b1662	ribC	H	riboflavin synthase subunit alpha	PWYS_RIBOSYN2-PWY
	46	b1661	cfa	M	cyclopropane fatty acyl phospholipid synthase	PWYS_PWY0-541
	47	b0382	yaiB	-	hypothetical protein
	47	b1539	ydfG	R	putative oxidoreductase
	47	b1112	ycfR	-	hypothetical protein
	47	b1321	ycjX	R	putative EC 2.1 enzyme
	47	b1687	ydiJ	C	putative oxidase
	47	b2978	--			TFs-RGPs_ARCA-MONOMER - TFs-RGPs_G7546-MONOMER - TFs-RGPs_PC00027
	47	b2979	glcD	C	glycolate oxidase subunit D	TFs-RGPs_ARCA-MONOMER - TFs-RGPs_G7546-MONOMER - TFs-RGPs_PC00027
	48	b0440	hupB	EL	DNA-binding protein HU-beta, NS1 (HU-1)	PCs_CPLX0-2021 - TFs-RGPs_CPLX0-2021 - TFs-RGPs_PC00004 - TFs-RGPs_PD00196
	48	b0393	rdgC	L	recombination associated protein
	48	b0687	seqA	L	negative modulator of initiation of replication	TFs-RGPs_CPLX0-2021
	48	b1712	himA	L	integration host factor alpha subunit	PCs_PC00027 - TFs-RGPs_PC00027
	48	b3416	malQ	G	4-alpha-glucanotransferase (amylomaltase)	PWYS_GLYCOCAT-PWY - TFs-RGPs_PC00004 - TFs-RGPs_PD00237
	48	b0714	nei	L	endonuclease VIII
	48	b3998	nfi	L	endonuclease V (deoxyinosine 3'endoduclease)
	49	b4349	hsdM	V	DNA methylase M, host modification
	49	b0779	uvrB	L	excinuclease ABC subunit B	PCs_UVRABC-CPLX - TFs-RGPs_PC00010
	49	b3843	ubiD	H	3-octaprenyl-4-hydroxybenzoate decarboxylase	PWYS_UBISYN-PWY
	49	b3844	fre	H	NAD(P)H-flavin reductase
	49	b4348	hsdS	V	specificity determinant for hsdM and hsdR
	49	b4350	hsdR	V	endonuclease R, host restriction
	49	b0212	gloB	R	probable hydroxyacylglutathione hydrolase	PWYS_METHGLYUT-PWY
	50	b4255	yjgD	S	hypothetical protein
	50	b1288	fabI	I	enoyl-(acyl carrier protein) reductase	PWYS_FASYN-ELONG-PWY - PWYS_PWY0-862
	50	b2242	glpB	E	anaerobic glycerol-3-phosphate dehydrogenase subunit B	PCs_ANGLYC3PDEHYDROG-CPLX - PWYS_ANARESPDON-PWY - PWYS_PWY0-381 - TFs-RGPs_ARCA-MONOMER - TFs-RGPs_EG10320-MONOMER - TFs-RGPs_PC00004 - TFs-RGPs_PD00197 - TFs-RGPs_PD03576
	50	b2243	glpC	C	sn-glycerol-3-phosphate dehydrogenase (anaerobic), K-small subunit	PCs_ANGLYC3PDEHYDROG-CPLX - PWYS_ANARESPDON-PWY - PWYS_PWY0-381 - TFs-RGPs_ARCA-MONOMER - TFs-RGPs_EG10320-MONOMER - TFs-RGPs_PC00004 - TFs-RGPs_PD00197 - TFs-RGPs_PD03576
	50	b3197	yrbH	M	putative isomerase	PWYS_KDOSYN-PWY
	50	b3594	yibA	C	putative lyase
	50	b3651	trmH	J	putative tRNA/rRNA methyltransferase
	51	b0522	purK	F	phosphoribosylaminoimidazole carboxylase	PWYS_DENOVOPURINE2-PWY - TFs-RGPs_PC00033
	51	b0523	purE	F	phosphoribosylaminoimidazole carboxylase catalytic subunit	PWYS_DENOVOPURINE2-PWY - TFs-RGPs_PC00033
	51	b1849	purT	F	5'-phosphoribosylglycinamide transformylase	PWYS_DENOVOPURINE2-PWY
	51	b2500	purN	F	phosphoribosylglycinamide formyltransferase	PWYS_DENOVOPURINE2-PWY - PWYS_FOLSYN-PWY - TFs-RGPs_PC00033
	51	b4005	purD	F	phosphoribosylamine--glycine ligase	PWYS_DENOVOPURINE2-PWY - TFs-RGPs_PC00033
	51	b1232	purU	F	formyltetrahydrofolate deformylase	PWYS_1CMET2-PWY
	51	b4006	purH	F	bifunctional phosphoribosylaminoimidazolecarboxamide formyltransferase/IMP cyclohydrolase	PWYS_DENOVOPURINE2-PWY - TFs-RGPs_PC00033
	52	b0622	crcA	-	palmitoyl transferase for Lipid A, outer membrane integral protein
	52	b0623	cspE	K	cold shock protein E	TFs-RGPs_EG12179-MONOMER
	52	b0893	serS	J	seryl-tRNA synthetase	PWYS_PWY0-901 - PWYS_TRNA-CHARGING-PWY
	52	b1552	cspI	K	Qin prophage; cold shock-like protein
	52	b1557	cspB	K	Qin prophage; cold shock protein
	52	b3556	cspA	K	cold shock protein 7.4, transcriptional activator of hns	TFs-RGPs_EG12179-MONOMER - TFs-RGPs_PD03695
	52	b0990	cspG	K	homolog of Salmonella cold shock protein
	53	b0674	asnB	E	asparagine synthetase B	PWYS_ASPARAGINESYN-PWY - TFs-RGPs_EG12243-MONOMER
	53	b0678	nagB	G	glucosamine-6-phosphate deaminase	PWYS_GLUAMCAT-PWY - TFs-RGPs_PC00004 - TFs-RGPs_PD00266
	53	b0677	nagA	G	N-acetylglucosamine-6-phosphate deacetylase	PWYS_GLUAMCAT-PWY - TFs-RGPs_PC00004 - TFs-RGPs_PD00266
	53	b0680	glnS	J	glutaminyl-tRNA synthetase	PWYS_TRNA-CHARGING-PWY
	53	b0675	nagD	G	N-acetylglucosamine metabolism	TFs-RGPs_PC00004 - TFs-RGPs_PD00266
	53	b0676	nagC	KG	transcriptional repressor of genes for catabolic enzyme (NagC/XylR (ROK) family)	TFs-RGPs_PC00004 - TFs-RGPs_PD00266
	53	b0679	nagE	G	PTS family enzyme IIC (N-terminal); enzyme IIB (center); enzyme IIC (C-terminal), N-acetylglucosamine-specific	PCs_CPLX-167 - TFs-RGPs_PC00004 - TFs-RGPs_PD00266
	54	b3008	metC	E	cystathionine beta-lyase	PWYS_HOMOSER-METSYN-PWY - PWYS_LCYSDEG-PWY - TFs-RGPs_PD04032
	54	b3939	metB	E	cystathionine gamma-synthase	PWYS_HOMOSER-METSYN-PWY - PWYS_THREOCAT-PWY - TFs-RGPs_PD04032
	54	b3956	ppc	C	phosphoenolpyruvate carboxylase	PWYS_ANARESP1-PWY - PWYS_FERMENTATION-PWY - PWYS_GLUCONEO-PWY
	54	b3938	metJ	KE	transcriptional repressor protein MetJ	TFs-RGPs_PD04032
	54	b3940	metL	E	bifunctional aspartate kinase II/homoserine dehydrogenase II	PWYS_HOMOSERSYN-PWY - TFs-RGPs_PD04032
	54	b3941	metF	E	5,10-methylenetetrahydrofolate reductase	PWYS_1CMET2-PWY - TFs-RGPs_PD04032
	54	b3942	katG	P	catalase; hydroperoxidase HPI(I)	PWYS_DETOX1-PWY - TFs-RGPs_PD00214
	55	b0947	ycbX	C	putative Fe-S protein
	55	b2763	cysI	P	sulfite reductase, alpha subunit	PCs_SULFITE-REDUCT-CPLX - PWYS_SO4ASSIM-PWY - TFs-RGPs_PC00040
	55	b2764	cysJ	P	sulfite reductase (NADPH), flavoprotein beta subunit	PCs_SULFITE-REDUCT-CPLX - PWYS_SO4ASSIM-PWY - TFs-RGPs_PC00040
	55	b2750	cysC	P	adenylylsulfate kinase	PWYS_SO4ASSIM-PWY - TFs-RGPs_PC00040
	55	b2751	cysN	P	sulfate adenylyltransferase subunit 1	PCs_SULFATE-ADENYLYLTRANS-CPLX - PWYS_SO4ASSIM-PWY - TFs-RGPs_PC00040
	55	b2752	cysD	EH	sulfate adenylyltransferase subunit 2	PCs_SULFATE-ADENYLYLTRANS-CPLX - PWYS_SO4ASSIM-PWY - TFs-RGPs_PC00040
	55	b2762	cysH	EH	phosphoadenosine phosphosulfate reductase	PWYS_SO4ASSIM-PWY - TFs-RGPs_PC00040
	56	b1521	uxaB	G	tagaturonate reductase	PWYS_GALACTUROCAT-PWY - TFs-RGPs_PD03270
	56	b3092	uxaC	G	uronate isomerase	PWYS_GALACTUROCAT-PWY - PWYS_GLUCUROCAT-PWY - TFs-RGPs_PD03270
	56	b4323	uxuB	G	D-mannonate oxidoreductase	PWYS_GLUCUROCAT-PWY - TFs-RGPs_EG20249-MONOMER - TFs-RGPs_PC00004 - TFs-RGPs_PD03270
	56	b3093	exuT	GEP	hexuronate transport protein (MFS family)	TFs-RGPs_PD03270
	56	b3094	exuR	K	negative regulator of exu regulon, exuT, uxaAC, and uxuB	TFs-RGPs_PD03270
	56	b4322	uxuA	G	mannonate dehydratase	PWYS_GLUCUROCAT-PWY - TFs-RGPs_EG20249-MONOMER - TFs-RGPs_PC00004 - TFs-RGPs_PD03270
	56	b4324	uxuR	K	regulator for uxu operon	TFs-RGPs_EG20249-MONOMER - TFs-RGPs_PC00004 - TFs-RGPs_PD03270
	57	b1627	rnfA	C	Na(+)-translocating NADH-quinone reductase subunit E
	57	b1628	rnfB	C	electron transport complex protein RnfB
	57	b1629	rnfC	C	electron transport complex protein RnfC
	57	b1630	rnfD	C	electron transport complex protein RnfD
	57	b1631	rnfG	C	electron transport complex protein RnfG
	57	b1632	rnfE	C	NADH-ubiquinone oxidoreductase
	57	b1633	nth	L	endonuclease III; DNA glycosylase/apyrimidinic (AP) lyase
	58	b1817	manX	G	PTS enzyme IIAB, mannose-specific	PCs_CPLX-165 - TFs-RGPs_PC00004 - TFs-RGPs_PD00266 - TFs-RGPs_PD01896
	58	b1818	manY	G	PTS enzyme IIC, mannose-specific	PCs_CPLX-165 - TFs-RGPs_PC00004 - TFs-RGPs_PD00266 - TFs-RGPs_PD01896
	58	b1819	manZ	G	PTS enzyme IID, mannose-specific	PCs_CPLX-165 - TFs-RGPs_PC00004 - TFs-RGPs_PD00266 - TFs-RGPs_PD01896
	58	b3133	agaV	G	PTS family enzyme IIB component 2, N-acetylgalactosamine-specific	TFs-RGPs_G7630-MONOMER - TFs-RGPs_PC00004
	58	b3140	agaD	G	PTS family enzyme IID, N-acetylglucosamine-specific	PCs_CPLX-170 - TFs-RGPs_G7630-MONOMER
	58	b3139	agaC	G	PTS family enzyme IIC component 1, N-acetylgalactosamine-specific	PCs_CPLX-170 - TFs-RGPs_G7630-MONOMER
	58	b3138	agaB	G	PTS family enzyme IIB component 1, N-acetylgalactosamine-specific	PCs_CPLX-170 - TFs-RGPs_G7630-MONOMER
	59	b2103	thiD	H	phosphomethylpyrimidine kinase	PWYS_THISYN-PWY
	59	b2104	thiM	H	hydroxyethylthiazole kinase	PWYS_THISYN-PWY
	59	b3993	thiE	H	thiamine-phosphate pyrophosphorylase	PWYS_THISYN-PWY
	59	b3990	thiH	H	thiamine biosynthesis protein ThiH	PWYS_THISYN-PWY
	59	b3991	thiG	H	thiazole synthase	PWYS_THISYN-PWY
	59	b3992	thiF	H	thiamine biosynthesis protein ThiF
	59	b3994	thiC	H	thiamine biosynthesis protein ThiC	PWYS_THISYN-PWY
	60	b2313	cvpA	R	membrane protein required for colicin V production	TFs-RGPs_PC00033
	60	b2314	dedD	S	putative lipoprotein
	60	b2315	folC	H	dihydrofolate:folylpolyglutamate synthetase; dihydrofolate synthetase	PWYS_1CMET2-PWY - PWYS_FOLSYN-PWY - PWYS_PWY-2161
	60	b2316	accD	I	acetyl-CoA carboxylase beta subunit	PCs_ACETYL-COA-CARBOXYLMULTI-CPLX - PCs_ACETYL-COA-CARBOXYLTRANSFER-CPLX - PWYS_FASYN-INITIAL-PWY
	60	b2318	truA	J	tRNA pseudouridine synthase A
	60	b2317	dedA	S	putative integral membrane protein
	60	b3775	ppiC	O	peptidyl-prolyl cis-trans isomerase C (rotamase C)
	61	b3201	yhbG	R	putative ATP-binding component of a transport system	PCs_ABC-53-CPLX
	61	b3454	livF	E	ATP-binding component of leucine transport	PCs_ABC-15-CPLX - PCs_ABC-304-CPLX - TFs-RGPs_PD00353
	61	b3456	livM	E	high-affinity branched-chain amino acid transport	PCs_ABC-15-CPLX - PCs_ABC-304-CPLX - TFs-RGPs_PD00353
	61	b3457	livH	E	high-affinity branched-chain amino acid transport protein (ABC superfamily, membrane)	PCs_ABC-15-CPLX - PCs_ABC-304-CPLX - TFs-RGPs_PD00353
	61	b3455	livG	E	ATP-binding component of high-affinity branched-chain amino acid transport system	PCs_ABC-15-CPLX - PCs_ABC-304-CPLX - TFs-RGPs_PD00353
	61	b3458	livK	E	high-affinity branched-chain amino acid transport protein (ABC superfamily, peri_bind)	PCs_ABC-304-CPLX - TFs-RGPs_PD00353
	61	b3460	livJ	E	high-affinity branched-chain amino acid transport protein (ABC superfamily, peri_bind)	PCs_ABC-15-CPLX - TFs-RGPs_PD00353
	62	b3802	hemY	H	a late step of protoheme IX synthesis
	62	b3806	cyaA	F	adenylate cyclase	TFs-RGPs_PC00004
	62	b4098	phnJ	P	conserved protein in phn operon	TFs-RGPs_PHOB-MONOMER
	62	b4099	phnI	P	phosphonate metabolism	TFs-RGPs_PHOB-MONOMER
	62	b4095	phnM	P	phosphonate metabolism	TFs-RGPs_PHOB-MONOMER
	62	b4100	phnH	P	phosphonate metabolism	TFs-RGPs_PHOB-MONOMER
	62	b4101	phnG	P	phosphonate metabolism	TFs-RGPs_PHOB-MONOMER
	63	b0098	secA	U	translocase	PCs_SEC-SECRETION-CPLX
	63	b3300	prlA	U	preprotein translocase SecY	PCs_SEC-SECRETION-CPLX - PCs_SECE-G-Y-CPLX
	63	b0097	yacA	-	SecA regulator SecM
	63	b3175	secG	U	protein-export membrane protein	PCs_SEC-SECRETION-CPLX - PCs_SECE-G-Y-CPLX
	63	b3981	secE	U	translocase	PCs_SEC-SECRETION-CPLX - PCs_SECE-G-Y-CPLX
	63	b4391	yjjK	R	putative ATP-binding component of a transport system
	64	b2526	hscA	O	chaperone protein HscA
	64	b2530	iscS	E	cysteine desulfurase	PWYS_PWY0-1021 - TFs-RGPs_G7326-MONOMER
	64	b1848	yebG	S	DNA damage-inducible gene in SOS regulon, dependent on cyclic AMP and H-NS
	64	b1928	yedD	-	hypothetical protein
	64	b2529	iscU	C	involved in Fe-S biosynthesis	TFs-RGPs_G7326-MONOMER
	64	b2533	suhB	G	inositol monophosphatase
	65	b0048	folA	H	dihydrofolate reductase type I, trimethoprim resistance	PWYS_1CMET2-PWY - PWYS_FOLSYN-PWY
	65	b0049	apaH	T	diadenosinetetraphosphatase
	65	b0050	apaG	P	hypothetical protein
	65	b0051	ksgA	J	dimethyladenosine transferase	TFs-RGPs_PD00196
	65	b0052	pdxA	H	4-hydroxythreonine-4-phosphate dehydrogenase	PWYS_PYRIDOXSYN-PWY - TFs-RGPs_PD00196
	65	b0054	imp	M	organic solvent tolerance protein precursor
	66	b0071	leuD	E	isopropylmalate isomerase small subunit	PCs_3-ISOPROPYLMALISOM-CPLX - PWYS_LEUSYN-PWY - TFs-RGPs_PD00353 - TFs-RGPs_PD00519
	66	b0072	leuC	E	isopropylmalate isomerase large subunit	PCs_3-ISOPROPYLMALISOM-CPLX - PWYS_LEUSYN-PWY - TFs-RGPs_PD00353 - TFs-RGPs_PD00519
	66	b0073	leuB	CE	3-isopropylmalate dehydrogenase	PWYS_LEUSYN-PWY - TFs-RGPs_PD00353 - TFs-RGPs_PD00519
	66	b0074	leuA	E	2-isopropylmalate synthase	PWYS_LEUSYN-PWY - TFs-RGPs_PD00353 - TFs-RGPs_PD00519
	66	b0771	ybhJ	C	putative enzyme
	66	b1800	yeaU	CE	putative tartrate dehydrogenase
	67	b1262	trpC	E	bifunctional indole-3-glycerol phosphate synthase/phosphoribosylanthranilate isomerase	PWYS_TRPSYN-PWY - TFs-RGPs_PC00007
	67	b1261	trpB	E	tryptophan synthase subunit beta	PCs_TRYPSYN - PWYS_TRPSYN-PWY - TFs-RGPs_PC00007
	67	b1263	trpD	EH	anthranilate phosphoribosyltransferase	PCs_ANTHRANSYN-CPLX - PWYS_TRPSYN-PWY - TFs-RGPs_PC00007
	67	b1264	trpE	EH	anthranilate synthase component I	PCs_ANTHRANSYN-CPLX - PWYS_TRPSYN-PWY - TFs-RGPs_PC00007
	67	b1260	trpA	E	tryptophan synthase subunit alpha	PCs_TRYPSYN - PWYS_TRPSYN-PWY - TFs-RGPs_PC00007
	67	b1265	trpL	-	trp operon leader peptide	TFs-RGPs_PC00007
	68	b3315	rplV	J	50S ribosomal protein L22
	68	b1724	ydiZ	-	hypothetical protein
	68	b1754	ynjB	R	hypothetical protein
	68	b3356	yhfA	O	hypothetical protein	TFs-RGPs_PC00004
	68	b3522	yhjD	S	hypothetical protein
	68	b4209	ytfE	D	hypothetical protein
	69	b3637	rpmB	J	50S ribosomal protein L28
	69	b0389	yaiA	-	unknown CDS	TFs-RGPs_PC00007 - TFs-RGPs_PD00413
	69	b1253	yciA	I	putative enzyme
	69	b2520	yfhM	R	hypothetical protein
	69	b2531	iscR	K	Fe-S cluster-containing transcription factor	TFs-RGPs_G7326-MONOMER
	69	b4218	ytfL	R	putative hemolysin-related membrane protein
	70	b0131	panD	H	aspartate 1-decarboxylase precursor	PWYS_PANTO-PWY
	70	b0133	panC	H	pantoate--beta-alanine ligase	PWYS_PANTO-PWY
	70	b0134	panB	H	3-methyl-2-oxobutanoate hydroxymethyltransferase	PWYS_PANTO-PWY
	70	b0480	ushA	F	UDP-sugar hydrolase (5'-nucleotidase)
	70	b2299	yfcD	L	putative enzyme (Nudix hydrolase)
	70	b4055	aphA	R	diadenosine tetraphosphatase
	71	b0154	hemL	H	glutamate-1-semialdehyde aminotransferase	PWYS_HEMESYN2-PWY
	71	b0369	hemB	H	delta-aminolevulinic acid dehydratase	PWYS_HEMESYN2-PWY
	71	b1210	hemA	H	glutamyl-tRNA reductase	PWYS_HEMESYN2-PWY - TFs-RGPs_ARCA-MONOMER - TFs-RGPs_PC00027 - TFs-RGPs_PD00197
	71	b3805	hemC	H	porphobilinogen deaminase	PWYS_HEMESYN2-PWY
	71	b3997	hemE	H	uroporphyrinogen decarboxylase	PWYS_HEMESYN2-PWY
	71	b3804	hemD	H	uroporphyrinogen-III synthetase	PWYS_HEMESYN2-PWY
	72	b0104	guaC	F	guanosine 5'-monophosphate oxidoreductase
	72	b0237	pepD	E	aminoacyl-histidine dipeptidase (peptidase D)
	72	b2908	pepP	E	proline aminopeptidase P II
	72	b1199	dhaL	G	dihydroxyacetone kinase, C-terminal domain	PCs_CPLX0-2081
	72	b1200	dhaK	G	dihydroxyacetone kinase, N-terminal domain	PCs_CPLX0-2081
	72	b1201	dhaR	QK	probable transcription activator for the dha operon; Sigma54-dependent activator
	73	b0400	phoR	T	positive and negative sensor protein for pho regulon	PWYS_PHOR-PWY - TFs-RGPs_PHOB-MONOMER
	73	b0570	cusS	T	sensor kinase of copper sensing two-component system.
	73	b4399	creC	T	catabolite repression sensor kinase for PhoB; alternative sensor for pho regulon	PWYS_CRE-PWY
	73	b0571	cusR	TK	response regulator in two-component regulatory system with CusS, regulation of copper resistance	TFs-RGPs_G6319-MONOMER
	73	b1968	yedV	T	putative 2-component sensor protein
	73	b4400	creD	V	tolerance to colicin E2
	74	b0695	kdpD	T	sensor for high-affinity potassium transport system	PWYS_KDP-PWY
	74	b0694	kdpE	TK	regulator of kdp operon (transcriptional effector)	PWYS_KDP-PWY - TFs-RGPs_KDPE-MONOMER
	74	b0696	kdpC	P	potassium-transporting ATPase subunit C	PCs_ATPASE-1-CPLX - TFs-RGPs_KDPE-MONOMER
	74	b0697	kdpB	P	potassium-transporting ATPase subunit B	PCs_ATPASE-1-CPLX - TFs-RGPs_KDPE-MONOMER
	74	b0698	kdpA	P	potassium-transporting ATPase subunit A	PCs_ATPASE-1-CPLX - TFs-RGPs_KDPE-MONOMER
	74	b1098	tmk	F	thymidylate kinase	PWYS_PWY0-166
	75	b3236	mdh	C	malate dehydrogenase	PWYS_ANARESP1-PWY - PWYS_FERMENTATION-PWY - PWYS_GLUCONEO-PWY - PWYS_GLYOXDEG-PWY - PWYS_GLYOXYLATE-BYPASS - PWYS_TCA - TFs-RGPs_ARCA-MONOMER - TFs-RGPs_EG10320-MONOMER - TFs-RGPs_PC00004
	75	b1285	yciR	T	RNase II modulator
	75	b3244	tldD	R	suppresses inhibitory activity of CsrA
	75	b4235	pmbA	R	maturation of antibiotic MccB17, see tld genes
	75	b1955	yedP	R	hypothetical protein
	75	b3237	argR	K	arginine repressor	TFs-RGPs_PC00005
	76	b0783	moaC	H	molybdenum cofactor biosynthesis protein C	TFs-RGPs_MONOMER0-185 - TFs-RGPs_PD00197
	76	b0781	moaA	H	molybdenum cofactor biosynthesis protein A	TFs-RGPs_MONOMER0-185 - TFs-RGPs_PD00197
	76	b0784	moaD	H	molybdopterin biosynthesis	PCs_CPLX0-2502 - TFs-RGPs_MONOMER0-185 - TFs-RGPs_PD00197
	76	b0785	moaE	H	molybdopterin converting factor, subunit 2	PCs_CPLX0-2502 - TFs-RGPs_MONOMER0-185 - TFs-RGPs_PD00197
	76	b0782	moaB	H	molybdopterin biosynthesis protein B	TFs-RGPs_MONOMER0-185 - TFs-RGPs_PD00197
	76	b0826	moeB	H	molybdopterin biosynthesis protein MoeB	TFs-RGPs_ARCA-MONOMER - TFs-RGPs_NARL-MONOMER - TFs-RGPs_PD00197
	77	b1236	galU	M	glucose-1-phosphate uridylyltransferase	PWYS_COLANSYN-PWY - PWYS_GALACTMETAB-PWY - PWYS_GLUCOSE1PMETAB-PWY
	77	b2091	gatD	E	galactitol-1-phosphate dehydrogenase	PWYS_GALACTITOLCAT-PWY - TFs-RGPs_PC00063
	77	b2042	galF	M	homolog of Salmonella UTP--glucose-1-P uridyltransferase, probably a UDP-gal transferase
	77	b2249	yfaY	R	competence damage-inducible protein A
	77	b2381	ypdB	KT	putative 2-component transcriptional regulator
	77	b2291	yfbR	R	hypothetical protein
	78	b2265	menF	HQ	menaquinone-specific isochorismate synthase	PWYS_MENAQUINONESYN-PWY
	78	b2260	menE	IQ	O-succinylbenzoic acid--CoA ligase	PWYS_MENAQUINONESYN-PWY
	78	b2261	menC	H	O-succinylbenzoate synthase	PWYS_MENAQUINONESYN-PWY
	78	b2262	menB	H	naphthoate synthase	PWYS_MENAQUINONESYN-PWY
	78	b2264	menD	H	2-oxoglutarate decarboxylase	PWYS_MENAQUINONESYN-PWY
	78	b2263	yfbB	R	putative enzyme
	79	b1682	sufC	O	putative ATP-binding component of a transport system	PCs_CPLX0-1341 - TFs-RGPs_PD00214
	79	b1679	sufE	R	cysteine desufuration protein SufE	TFs-RGPs_PD00214
	79	b1680	sufS	E	selenocysteine lyase	TFs-RGPs_PD00214
	79	b1681	sufD	O	required for stability of iron-sulfur component of FhuF	PCs_CPLX0-1341 - TFs-RGPs_PD00214
	79	b1683	sufB	O	putative transport protein	PCs_CPLX0-1341 - TFs-RGPs_PD00214
	79	b1684	sufA	S	iron-sulfur cluster assembly scaffold protein	TFs-RGPs_PD00214
	80	b1303	pspF	KT	psp operon transcriptional activator	TFs-RGPs_EG12344-MONOMER
	80	b1304	pspA	KT	phage shock protein, inner membrane protein	TFs-RGPs_EG12344-MONOMER - TFs-RGPs_PC00027
	80	b1305	pspB	-	phage shock protein B	TFs-RGPs_EG12344-MONOMER - TFs-RGPs_PC00027
	80	b1306	pspC	KT	phage shock protein: activates phage shock-protein expression	TFs-RGPs_EG12344-MONOMER - TFs-RGPs_PC00027
	80	b1307	pspD	-	phage shock protein	TFs-RGPs_EG12344-MONOMER - TFs-RGPs_PC00027
	80	b1308	pspE	P	phage shock protein	TFs-RGPs_EG12344-MONOMER - TFs-RGPs_PC00027
	81	b1508	hipB	K	persistence to inhibition of murein or DNA biosynthesis; regulatory protein
	81	b3223	nanE	G	ManNAc epimerase	TFs-RGPs_G7678-MONOMER - TFs-RGPs_PC00004
	81	b3225	nanA	EM	N-acetylneuraminate lyase	TFs-RGPs_G7678-MONOMER - TFs-RGPs_PC00004
	81	b3224	nanT	GEP	putative sialic acid transporter	TFs-RGPs_G7678-MONOMER - TFs-RGPs_PC00004
	81	b3973	birA	HK	biotin--protein ligase	PWYS_FASYN-INITIAL-PWY - TFs-RGPs_BIOTINLIG-MONOMER
	81	b3974	coaA	H	pantothenate kinase	PWYS_COA-PWY
	82	b1713	pheT	J	phenylalanyl-tRNA synthetase beta subunit	PCs_PHES-CPLX - PWYS_TRNA-CHARGING-PWY
	82	b1714	pheS	J	phenylalanyl-tRNA synthetase alpha subunit	PCs_PHES-CPLX - PWYS_TRNA-CHARGING-PWY
	82	b4081	yjcQ	S	putative enzyme
	82	b1715	pheM	-	phenylalanyl-tRNA synthetase (pheST) operon leader peptide
	82	b1876	argS	J	arginyl-tRNA synthetase	PWYS_TRNA-CHARGING-PWY
	82	b1990	erfK	S	hypothetical protein
	83	b1734	celF	G	phospho-beta-glucosidase, NAD(P)-binding (cellobiose-6-phosphate hydrolase)	TFs-RGPs_EG10143-MONOMER - TFs-RGPs_PC00004 - TFs-RGPs_PD00266
	83	b1735	celD	K	negative transcriptional regulator of cel operon	TFs-RGPs_EG10143-MONOMER - TFs-RGPs_PC00004 - TFs-RGPs_PD00266
	83	b1736	celC	G	PEP-dependent phosphotransferase enzyme III for cellobiose, arbutin, and salicin	PCs_CPLX-155 - TFs-RGPs_EG10143-MONOMER - TFs-RGPs_PC00004 - TFs-RGPs_PD00266
	83	b1737	celB	G	PEP-dependent phosphotransferase enzyme II for cellobiose, arbutin, and salicin	PCs_CPLX-155 - TFs-RGPs_EG10143-MONOMER - TFs-RGPs_PC00004 - TFs-RGPs_PD00266
	83	b3681	glvG	G	probable 6-phospho-beta-glucosidase
	83	b1738	celA	G	PEP-dependent phosphotransferase enzyme IV for cellobiose, arbutin, and salicin	PCs_CPLX-155 - TFs-RGPs_EG10143-MONOMER - TFs-RGPs_PC00004 - TFs-RGPs_PD00266
	84	b1827	kdgR	K	putative transcriptional repressor (IclR family)
	84	b3901	yiiL	S	hypothetical protein
	84	b1832	yebR	T	hypothetical protein
	84	b1836	yebV	-	unknown CDS
	84	b1953	yodD	-	unknown CDS
	84	b1815	yoaD	T	hypothetical protein
	85	b2038	rfbC	M	dTDP-4,deoxyrhamnose 3,5 epimerase	PCs_DTDPRHAMSYNTHMULTI-CPLX - PWYS_DTDPRHAMSYN-PWY
	85	b2039	rfbA	M	dTDP-glucose pyrophosphorylase	PWYS_DTDPRHAMSYN-PWY
	85	b2040	rfbD	M	TDP-rhamnose synthetase, NAD(P)-binding	PCs_DTDPRHAMSYNTHMULTI-CPLX - PWYS_DTDPRHAMSYN-PWY
	85	b2041	rfbB	M	dTDP-glucose 4,6 dehydratase	PWYS_DTDPRHAMSYN-PWY
	85	b3788	rffG	M	dTDP-glucose 4,6-dehydratase	PWYS_ECASYN-PWY
	85	b3789	rffH	M	glucose-1-phosphate thymidylyltransferase	PWYS_ECASYN-PWY
	86	b2194	ccmH	O	possible subunit of heme lyase	PCs_CPLX0-3323 - TFs-RGPs_MONOMER0-185 - TFs-RGPs_NARL-MONOMER - TFs-RGPs_NARP-MONOMER - TFs-RGPs_PD00197
	86	b2195	ccmG	OC	heme lyase/disulfide oxidoreductase (thiol:disulfide interchange protein)	PCs_CPLX0-3323 - TFs-RGPs_MONOMER0-185 - TFs-RGPs_NARL-MONOMER - TFs-RGPs_NARP-MONOMER - TFs-RGPs_PD00197
	86	b2196	ccmF	O	cytochrome c-type biogenesis protein	PCs_CPLX0-3323 - TFs-RGPs_MONOMER0-185 - TFs-RGPs_NARL-MONOMER - TFs-RGPs_NARP-MONOMER - TFs-RGPs_PD00197
	86	b2197	ccmE	O	cytochrome c biogenesis, possible subunit of a heme lyase	PCs_CPLX0-3323 - TFs-RGPs_MONOMER0-185 - TFs-RGPs_NARL-MONOMER - TFs-RGPs_NARP-MONOMER - TFs-RGPs_PD00197
	86	b2199	ccmC	O	heme export protein (ABC superfamily, membrane)	PCs_ABC-35-CPLX - PCs_CPLX0-3323 - TFs-RGPs_MONOMER0-185 - TFs-RGPs_NARL-MONOMER - TFs-RGPs_NARP-MONOMER - TFs-RGPs_PD00197
	86	b2201	ccmA	O	ATP binding protein of heme exporter A	PCs_ABC-35-CPLX - PCs_CPLX0-3323 - TFs-RGPs_MONOMER0-185 - TFs-RGPs_NARL-MONOMER - TFs-RGPs_NARP-MONOMER - TFs-RGPs_PD00197
	87	b2276	nuoN	C	NADH dehydrogenase subunit N	PCs_NADH-DHI-CPLX - PWYS_AERESPDON-PWY - PWYS_ANARESPDON-PWY - TFs-RGPs_ARCA-MONOMER - TFs-RGPs_NARL-MONOMER - TFs-RGPs_PC00027 - TFs-RGPs_PD00196 - TFs-RGPs_PD00197
	87	b2277	nuoM	C	NADH dehydrogenase subunit M	PCs_NADH-DHI-CPLX - PWYS_AERESPDON-PWY - PWYS_ANARESPDON-PWY - TFs-RGPs_ARCA-MONOMER - TFs-RGPs_NARL-MONOMER - TFs-RGPs_PC00027 - TFs-RGPs_PD00196 - TFs-RGPs_PD00197
	87	b2278	nuoL	CP	NADH dehydrogenase subunit L	PCs_NADH-DHI-CPLX - PWYS_AERESPDON-PWY - PWYS_ANARESPDON-PWY - TFs-RGPs_ARCA-MONOMER - TFs-RGPs_NARL-MONOMER - TFs-RGPs_PC00027 - TFs-RGPs_PD00196 - TFs-RGPs_PD00197
	87	b2482	hyfB	CP	NADH dehydrogenase subunit N	PCs_CPLX0-250 - TFs-RGPs_G7308-MONOMER - TFs-RGPs_PC00004 - TFs-RGPs_PD00197 - TFs-RGPs_PD02936
	87	b2484	hyfD	CP	hydrogenase 4 membrane subunit	PCs_CPLX0-250 - TFs-RGPs_G7308-MONOMER - TFs-RGPs_PC00004 - TFs-RGPs_PD00197 - TFs-RGPs_PD02936
	87	b2486	hyfF	CP	NADH dehydrogenase subunit N	PCs_CPLX0-250 - TFs-RGPs_G7308-MONOMER - TFs-RGPs_PC00004 - TFs-RGPs_PD00197 - TFs-RGPs_PD02936
	88	b4321	gntP	GE	gluconate transport protein, GNT III system (GntP family)	TFs-RGPs_EG20249-MONOMER - TFs-RGPs_PC00004
	88	b3415	gntT	GE	high-affinity gluconate permease in GNT I system (GntP family)	TFs-RGPs_PC00004 - TFs-RGPs_PD03585
	88	b3437	gntK	G	gluconate kinase 2 in GNT I system, thermoresistant	TFs-RGPs_G7891-MONOMER - TFs-RGPs_PC00004 - TFs-RGPs_PD03585
	88	b3438	gntR	K	regulator of gluconate (gnt) operon	TFs-RGPs_PD03585
	88	b4268	idnK	G	D-gluconate kinase, thermosensitive	PWYS_IDNCAT-PWY - TFs-RGPs_G7891-MONOMER - TFs-RGPs_PC00004 - TFs-RGPs_PD03585
	88	b4264	idnR	K	L-idonate transcriptional regulator	TFs-RGPs_G7891-MONOMER - TFs-RGPs_PC00004 - TFs-RGPs_PD03585
	89	b2452	eutH	E	ethanolamine utilization; homolog of Salmonella putative transport protein
	89	b2453	eutG	C	ethanolamine utilization; homolog of Salmonella enzyme, similar to iron-containing alcohol dehydrogenase
	89	b2455	eutE	C	ethanolamine utilization; similar to acetaldehyde dehydrogenase
	89	b2457	cchA	QC	detox protein
	89	b2454	eutJ	E	ethanolamine utilization; homolog of Salmonella gene
	89	b2456	cchB	QC	detox protein
	90	b2799	fucO	C	L-1,2-propanediol oxidoreductase	PWYS_FUCCAT-PWY - PWYS_GLYCOLATEMET-PWY - PWYS_RHAMCAT-PWY - TFs-RGPs_PC00004 - TFs-RGPs_PD00444
	90	b2800	fucA	G	L-fuculose phosphate aldolase	PWYS_DARABCATK12-PWY - PWYS_FUCCAT-PWY - TFs-RGPs_PC00004 - TFs-RGPs_PD00444
	90	b2802	fucI	G	L-fucose isomerase	PWYS_DARABCATK12-PWY - PWYS_FUCCAT-PWY - TFs-RGPs_PC00004 - TFs-RGPs_PD00444
	90	b2801	fucP	G	fucose permease	TFs-RGPs_PC00004 - TFs-RGPs_PD00444
	90	b2805	fucR	KG	positive regulator of the fuc operon	TFs-RGPs_PC00004 - TFs-RGPs_PD00444
	90	b2803	fucK	G	L-fuculokinase	PWYS_DARABCATK12-PWY - PWYS_FUCCAT-PWY - TFs-RGPs_PC00004 - TFs-RGPs_PD00444
	91	b3905	rhaS	K	positive regulator for rhaBAD operon	TFs-RGPs_PC00004 - TFs-RGPs_PC00086 - TFs-RGPs_PD00222
	91	b3906	rhaR	K	positive regulator for rhaRS operon	TFs-RGPs_PC00004 - TFs-RGPs_PD00222
	91	b3902	rhaD	G	rhamnulose-1-phosphate aldolase	PWYS_RHAMCAT-PWY - TFs-RGPs_PC00004 - TFs-RGPs_PC00086
	91	b3903	rhaA	G	L-rhamnose isomerase	PWYS_LYXMET-PWY - PWYS_RHAMCAT-PWY - TFs-RGPs_PC00004 - TFs-RGPs_PC00086
	91	b3904	rhaB	G	rhamnulokinase	PWYS_RHAMCAT-PWY - TFs-RGPs_PC00004 - TFs-RGPs_PC00086
	91	b3907	rhaT	GE	L-rhamnose:H+ symporter (DMT superfamily)	TFs-RGPs_ARCA-MONOMER - TFs-RGPs_PC00004 - TFs-RGPs_PC00086
	92	b2231	gyrA	L	DNA gyrase subunit A	PCs_CPLX0-2425 - TFs-RGPs_PC00004 - TFs-RGPs_PD00196 - TFs-RGPs_PD03695
	92	b0101	yacG	S	zinc-binding protein
	92	b0102	yacF	S	hypothetical protein
	92	b2009	sbmC	L	DNA gyrase inhibitor
	92	b3559	glyS	J	glycyl-tRNA synthetase beta subunit	PCs_GLYS-CPLX - PWYS_TRNA-CHARGING-PWY
	93	b0595	entB	Q	2,3-dihydro-2,3-dihydroxybenzoate synthetase, isochroismatase	PCs_ENTMULTI-CPLX - PWYS_ENTBACSYN-PWY - TFs-RGPs_PC00009
	93	b0586	entF	Q	ATP-dependent serine activating enzyme (may be part of enterobactin synthase as component F)	PCs_ENTMULTI-CPLX - PWYS_ENTBACSYN-PWY - TFs-RGPs_PC00009
	93	b0594	entE	Q	2,3-dihydroxybenzoate-AMP ligase	PCs_ENTMULTI-CPLX - PWYS_ENTBACSYN-PWY - TFs-RGPs_PC00009
	93	b0593	entC	HQ	isochorismate synthase	PWYS_ENTBACSYN-PWY - TFs-RGPs_PC00009
	93	b0596	entA	IQ	2,3-dihydroxybenzoate-2,3-dehydrogenase	PWYS_ENTBACSYN-PWY - TFs-RGPs_PC00009
	94	b3732	atpD	C	ATP synthase subunit B	PCs_ATPSYN-CPLX - PCs_F-1-CPLX
	94	b0878	macA	M	accessory protein to ABC-type macrolide transport protein MacB	PCs_TRANS-200-CPLX
	94	b0879	macB	V	macrolide transport protein (ABC superfamily, atp_bind (N-terminal), membrane (C-terminal))	PCs_TRANS-200-CPLX
	94	b1116	ycfU	M	transport protein of outer membrane lipoproteins (ABC superfamily, membrane)	PCs_ABC-62-CPLX
	94	b1118	ycfW	M	putative kinase	PCs_ABC-62-CPLX
	95	b2341	yfcX	I	bifunctional fatty acid oxidation complex protein: putative enoyl-CoA hydratase/isomerase (N-terminal); putative NAD(P)-binding dehydrogenase (C-terminal)	PCs_CPLX0-1668 - PWYS_FAO-PWY - TFs-RGPs_PD01520
	95	b2383	ypdD	GT	putative PTS family Hpr component (N-terminal); enzyme I component (middle); enzyme IIA component (C-terminal)
	95	b2342	yfcY	I	acetyl-CoA acetyltransferase	PCs_CPLX0-1668 - PWYS_FAO-PWY - TFs-RGPs_PD01520
	95	b2511	yfgK	R	GTP-binding protein EngA
	95	b2443	yffL	-	CPZ-55 prophage
	96	b0060	polB	L	DNA polymerase II
	96	b0061	araD	G	L-ribulose-5-phosphate 4-epimerase	PWYS_ARABCAT-PWY - PWYS_PWY0-301 - TFs-RGPs_PC00003 - TFs-RGPs_PC00004
	96	b0062	araA	G	L-arabinose isomerase	PWYS_ARABCAT-PWY - TFs-RGPs_PC00003 - TFs-RGPs_PC00004
	96	b0063	araB	C	ribulokinase	PWYS_ARABCAT-PWY - TFs-RGPs_PC00003 - TFs-RGPs_PC00004
	96	b0064	araC	K	transcriptional regulator for ara operon	TFs-RGPs_PC00003 - TFs-RGPs_PC00004
	97	b3958	argC	E	N-acetyl-gamma-glutamyl-phosphate reductase	PWYS_ARGSYN-PWY - TFs-RGPs_PC00005
	97	b3359	argD	E	bifunctional N-succinyldiaminopimelate-aminotransferase/acetylornithine transaminase protein	PWYS_ARGSYN-PWY - PWYS_DAPLYSINESYN-PWY - TFs-RGPs_PC00005
	97	b3960	argH	E	argininosuccinate lyase	PWYS_ARGSYN-PWY - TFs-RGPs_PC00005
	97	b3959	argB	E	acetylglutamate kinase	PWYS_ARGSYN-PWY - TFs-RGPs_PC00005
	97	b3957	argE	E	acetylornithine deacetylase	PWYS_ARGSYN-PWY - TFs-RGPs_PC00005
	98	b0150	fhuA	P	outer membrane pore protein, receptor for ferrichrome, colicin M, and phages T1, T5 and phi80	PCs_CPLX0-1942 - PCs_CPLX0-1981 - TFs-RGPs_PC00009
	98	b0151	fhuC	PH	ATP-binding component of hydroxymate-dependent iron transport	PCs_ABC-11-CPLX - PCs_CPLX0-1981 - TFs-RGPs_PC00009
	98	b0152	fhuD	P	hydroxamate-dependent iron transport protein (ABC superfamily, peri_bind)	PCs_ABC-11-CPLX - PCs_CPLX0-1981 - TFs-RGPs_PC00009
	98	b0153	fhuB	P	hydroxamate-dependent iron transport protein (ABC superfamily, membrane)	PCs_ABC-11-CPLX - PCs_CPLX0-1981 - TFs-RGPs_PC00009
	98	b1102	fhuE	P	outer membrane pore protein, receptor for Fe(III)-coprogen, Fe(III)-ferrioxamine B and Fe(III)-rhodotrulic acid	TFs-RGPs_PC00009 - TFs-RGPs_PD00260
	99	b1207	prsA	FE	ribose-phosphate pyrophosphokinase	PWYS_PWY0-662 - TFs-RGPs_PC00033
	99	b0959	yccR	K	hypothetical protein
	99	b1120	cobB	K	NAD-dependent deacetylase
	99	b1624	ydgJ	R	hypothetical oxidoreductase
	99	b2411	ligA	L	DNA ligase
	100	b2417	crr	G	glucose-specific PTS system enzyme IIA component	PCs_CPLX-157 - PCs_CPLX-164 - PCs_CPLX-168 - PWYS_TREDEGLOW-PWY - TFs-RGPs_PC00004 - TFs-RGPs_PC00061 - TFs-RGPs_PD01896
	100	b2416	ptsI	G	PEP-protein phosphotransferase system enzyme I	PCs_CPLX-153 - PCs_CPLX-154 - PCs_CPLX-155 - PCs_CPLX-156 - PCs_CPLX-157 - PCs_CPLX-158 - PCs_CPLX-159 - PCs_CPLX-160 - PCs_CPLX-163 - PCs_CPLX-164 - PCs_CPLX-165 - PCs_CPLX-166 - PCs_CPLX-167 - PCs_CPLX-168 - PCs_CPLX-169 - PCs_CPLX-170 - PCs_CPLX0-231 - PCs_CPLX0-232 - PCs_EIISGA - PCs_EIISGC - PWYS_TREDEGLOW-PWY - TFs-RGPs_PC00004 - TFs-RGPs_PC00061 - TFs-RGPs_PD01896
	100	b2413	cysZ	E	putative sulfate transport protein CysZ
	100	b2415	ptsH	G	PTS family Hpr protein, phosphohistidinoprotein-hexose phosphotransferase	PCs_CPLX-153 - PCs_CPLX-154 - PCs_CPLX-155 - PCs_CPLX-156 - PCs_CPLX-157 - PCs_CPLX-158 - PCs_CPLX-159 - PCs_CPLX-160 - PCs_CPLX-163 - PCs_CPLX-164 - PCs_CPLX-165 - PCs_CPLX-166 - PCs_CPLX-167 - PCs_CPLX-168 - PCs_CPLX-169 - PCs_CPLX-170 - PCs_CPLX0-231 - PCs_CPLX0-232 - PCs_EIISGA - PCs_EIISGC - PWYS_TREDEGLOW-PWY - TFs-RGPs_PC00004 - TFs-RGPs_PC00061 - TFs-RGPs_PD01896
	100	b3947	ptsA	GT	PEP-protein phosphotransferase system enzyme I
	101	b0284	yagR	C	putative molybdemum cofactor-binding oxidoreductase
	101	b0286	yagT	C	putative oxidoreductase, Fe-S subunit
	101	b2867	xdhB	C	putative xanthine dehydrogenase subunit, FAD-binding domain	PCs_CPLX0-761 - PWYS_SALVADEHYPOX-PWY
	101	b2868	xdhC	C	putative xanthine dehydrogenase, Fe-S subunit	PCs_CPLX0-761 - PWYS_SALVADEHYPOX-PWY
	101	b2866	xdhA	C	putative xanthine dehydrogenase subunit, molybdemum cofactor-binding domain	PCs_CPLX0-761 - PWYS_SALVADEHYPOX-PWY
	102	b3228	sspB	R	stringent starvation protein B
	102	b0486	ybaT	E	putative amino acid/amine transport protein
	102	b3229	sspA	O	stringent starvation protein A
	102	b3150	yraP	R	putative periplasmic protein
	102	b3193	yrbD	Q	putative transport protein (ABC superfamily, peri_bind)
	103	b0454	ybaZ	L	putative methyltransferase
	103	b2890	lysS	J	lysyl-tRNA synthetase	PWYS_TRNA-CHARGING-PWY
	103	b2891	prfB	J	peptide chain release factor 2
	103	b3115	tdcD	C	acetate/propionate kinase	PWYS_THREOCAT-PWY - TFs-RGPs_PC00004 - TFs-RGPs_PC00027 - TFs-RGPs_PD00268 - TFs-RGPs_PD03292
	103	b4267	idnD	E	L-idonate 5-dehydrogenase, NAD-binding	PWYS_IDNCAT-PWY - TFs-RGPs_G7891-MONOMER - TFs-RGPs_PC00004 - TFs-RGPs_PD03585
	104	b2476	purC	F	phosphoribosylaminoimidazole-succinocarboxamide synthase	PWYS_DENOVOPURINE2-PWY - TFs-RGPs_PC00033
	104	b2312	purF	F	amidophosphoribosyltransferase	PWYS_DENOVOPURINE2-PWY - TFs-RGPs_PC00033
	104	b2499	purM	F	phosphoribosylaminoimidazole synthetase	PWYS_DENOVOPURINE2-PWY - TFs-RGPs_PC00033
	104	b2557	purL	F	phosphoribosylformylglycinamidine synthase	PWYS_DENOVOPURINE2-PWY - TFs-RGPs_PC00033
	104	b2114	metG	J	methionyl-tRNA synthetase	PWYS_TRNA-CHARGING-PWY
	105	b0526	cysS	J	cysteinyl-tRNA synthetase	PWYS_TRNA-CHARGING-PWY
	105	b3607	cysE	E	serine acetyltransferase	PCs_CYSSYNMULTI-CPLX - PWYS_CYSTSYN-PWY
	105	b2414	cysK	E	cysteine synthase A, O-acetylserine sulfhydrolase A	PCs_CYSSYNMULTI-CPLX - PWYS_CYSTSYN-PWY - TFs-RGPs_PC00040
	105	b3608	gpsA	C	NAD(P)H-dependent glycerol-3-phosphate dehydrogenase	PWYS_PHOSLIPSYN-PWY
	105	b3609	secB	U	export protein SecB	PCs_SEC-SECRETION-CPLX
	106	b0535	fimZ	TK	fimbiral protein Z, putative transcriptional regulator of fimbrial expression (LuxR/UhpA family)
	106	b1221	narL	TK	pleiotrophic regulation of anaerobic respiration: response regulator for nar, frd, dms and tor genes	PWYS_NARQ-PWY - PWYS_NARX-PWY - TFs-RGPs_MONOMER0-185 - TFs-RGPs_NARL-MONOMER - TFs-RGPs_PD00197
	106	b2193	narP	TK	nitrate/nitrite response regulator (sensor NarQ)	PWYS_NARQ-PWY - PWYS_NARX-PWY - TFs-RGPs_NARP-MONOMER
	106	b1222	narX	T	nitrate/nitrate sensor, histidine protein kinase acts on NarL regulator	PWYS_NARX-PWY - TFs-RGPs_MONOMER0-185 - TFs-RGPs_PD00197
	106	b2469	narQ	T	sensor for nitrate reductase system, protein histidine kinase (acts on NarP and narL)	PWYS_NARQ-PWY
	107	b0588	fepC	PH	ATP-binding component of ferric enterobactin transport	PCs_ABC-10-CPLX - PCs_CPLX0-1944 - TFs-RGPs_PC00009
	107	b0589	fepG	P	ferric enterobactin transport protein	PCs_ABC-10-CPLX - PCs_CPLX0-1944 - TFs-RGPs_PC00009
	107	b0590	fepD	P	ferric enterobactin (enterochelin) transport	PCs_ABC-10-CPLX - PCs_CPLX0-1944 - TFs-RGPs_PC00009
	107	b0592	fepB	P	ferric enterobactin (enterochelin) binding protein; periplasmic component	PCs_ABC-10-CPLX - PCs_CPLX0-1944 - TFs-RGPs_PC00009 - TFs-RGPs_PD00260
	107	b0591	ybdA	GEP	putative transport	TFs-RGPs_PD00260
	108	b4153	frdB	C	succinate dehydrogenase	PCs_FUMARATE-REDUCTASE - PWYS_ANARESP1-PWY - PWYS_ANARESPACC-PWY - PWYS_FERMENTATION-PWY - TFs-RGPs_DCUR-MONOMER - TFs-RGPs_NARL-MONOMER - TFs-RGPs_PD00197
	108	b4151	frdD	C	fumarate reductase subunit D	PCs_FUMARATE-REDUCTASE - PWYS_ANARESP1-PWY - PWYS_ANARESPACC-PWY - PWYS_FERMENTATION-PWY - TFs-RGPs_DCUR-MONOMER - TFs-RGPs_NARL-MONOMER - TFs-RGPs_PD00197
	108	b4152	frdC	C	fumarate reductase subunit C	PCs_FUMARATE-REDUCTASE - PWYS_ANARESP1-PWY - PWYS_ANARESPACC-PWY - PWYS_FERMENTATION-PWY - TFs-RGPs_DCUR-MONOMER - TFs-RGPs_NARL-MONOMER - TFs-RGPs_PD00197
	108	b4154	frdA	C	fumarate reductase	PCs_FUMARATE-REDUCTASE - PWYS_ANARESP1-PWY - PWYS_ANARESPACC-PWY - PWYS_FERMENTATION-PWY - TFs-RGPs_DCUR-MONOMER - TFs-RGPs_NARL-MONOMER - TFs-RGPs_PD00197
	108	b1447	ydcZ	S	putative transport protein
	109	b0733	cydA	C	cytochrome d terminal oxidase, polypeptide subunit I	PCs_CYT-D-UBIOX-CPLX - TFs-RGPs_ARCA-MONOMER - TFs-RGPs_PD00197 - TFs-RGPs_PD00288
	109	b0734	cydB	C	cytochrome d terminal oxidase polypeptide subunit II	PCs_CYT-D-UBIOX-CPLX - TFs-RGPs_ARCA-MONOMER - TFs-RGPs_PD00197 - TFs-RGPs_PD00288
	109	b0978	appC	C	cytochrome oxidase bd-II, subunit I	PCs_APP-UBIOX-CPLX - TFs-RGPs_PD00967
	109	b0979	appB	C	cytochrome oxidase bd-II, subunit II	PCs_APP-UBIOX-CPLX - TFs-RGPs_PD00967
	109	b0980	appA	-	phosphoanhydride phosphorylase; pH 2.5 acid phosphatase; periplasmic	TFs-RGPs_PD00967
	110	b0760	modF	P	ATP-binding component of molybdate transport system
	110	b0761	modE	R	molybdate uptake regulatory protein	TFs-RGPs_MONOMER0-185
	110	b0763	modA	P	molybdate transport protein (ABC superfamily, peri_bind)	PCs_ABC-19-CPLX - TFs-RGPs_MONOMER0-185
	110	b0764	modB	P	molybdate transport permease protein	PCs_ABC-19-CPLX - TFs-RGPs_MONOMER0-185
	110	b0765	modC	P	ATP-binding component of molybdate transport	PCs_ABC-19-CPLX - TFs-RGPs_MONOMER0-185
	111	b0774	bioA	H	adenosylmethionine--8-amino-7-oxononanoate transaminase	PWYS_BIOTIN-SYNTHESIS-PWY - TFs-RGPs_BIOTINLIG-MONOMER
	111	b0775	bioB	H	biotin synthesis, sulfur insertion?	PWYS_BIOTIN-SYNTHESIS-PWY - TFs-RGPs_BIOTINLIG-MONOMER
	111	b0776	bioF	H	8-amino-7-oxononanoate synthase	PWYS_BIOTIN-SYNTHESIS-PWY - TFs-RGPs_BIOTINLIG-MONOMER
	111	b0777	bioC	Q	biotin biosynthesis; reaction prior to pimeloyl CoA	TFs-RGPs_BIOTINLIG-MONOMER
	111	b1593	bioD	H	dithiobiotin synthetase
	112	b2913	serA	HE	D-3-phosphoglycerate dehydrogenase	PWYS_SERSYN-PWY - TFs-RGPs_PC00004 - TFs-RGPs_PD00353
	112	b2914	rpiA	G	ribose-5-phosphate isomerase A	PWYS_NONOXIPENT-PWY - PWYS_RIBOKIN-PWY
	112	b2916	iciA	K	chromosome replication initiation inhibitor protein	TFs-RGPs_EG10490-MONOMER - TFs-RGPs_PHOB-MONOMER
	112	b2923	yggA	R	arginine exporter protein
	112	b2924	yggB	M	component of the MscS mechanosensitive channel
	113	b1703	ydiA	S	hypothetical protein
	113	b2594	rluD	J	23S rRNA pseudouridine synthase
	113	b3847	pepQ	E	proline dipeptidase
	113	b3842	rfaH	K	transcriptional activator RfaH
	113	b3848	yigZ	S	putative elongation factor
	114	b1857	znuA	P	High-affinity zinc uptake system periplasmic protein	PCs_ABC-63-CPLX
	114	b1858	znuC	P	High-affinity zinc uptake system ATP-binding protein	PCs_ABC-63-CPLX - TFs-RGPs_EG11929-MONOMER
	114	b1859	znuB	P	High-affinity zinc uptake system membrane protein	PCs_ABC-63-CPLX - TFs-RGPs_EG11929-MONOMER
	114	b1864	yebC	S	hypothetical protein
	114	b2521	sseA	P	3-mercaptopyruvate sulfurtransferase
	115	b1983	yeeN	S	hypothetical protein
	115	b2234	nrdA	F	ribonucleotide-diphosphate reductase alpha subunit	PCs_RIBONUCLEOSIDE-DIP-REDUCTI-CPLX - PWYS_DENOVOPURINE2-PWY - PWYS_PWY0-166 - TFs-RGPs_EG10490-MONOMER - TFs-RGPs_PD00196 - TFs-RGPs_PD03831
	115	b2235	nrdB	F	ribonucleotide-diphosphate reductase beta subunit	PCs_RIBONUCLEOSIDE-DIP-REDUCTI-CPLX - PWYS_DENOVOPURINE2-PWY - PWYS_PWY0-166 - TFs-RGPs_EG10490-MONOMER - TFs-RGPs_PD00196 - TFs-RGPs_PD03831
	115	b2675	nrdE	F	ribonucleotide-diphosphate reductase alpha subunit	PCs_RIBONUCLEOSIDE-DIP-REDUCTII-CPLX - PWYS_DENOVOPURINE2-PWY - PWYS_PWY0-166 - TFs-RGPs_PC00009
	115	b2676	nrdF	F	ribonucleotide-diphosphate reductase beta subunit	PCs_RIBONUCLEOSIDE-DIP-REDUCTII-CPLX - PWYS_DENOVOPURINE2-PWY - PWYS_PWY0-166 - TFs-RGPs_PC00009
	116	b3428	glgP	G	glycogen phosphorylase	PWYS_GLYCOCAT-PWY - TFs-RGPs_PC00004
	116	b3429	glgA	G	glycogen synthase	PWYS_GLYCOGENSYNTH-PWY - TFs-RGPs_PC00004
	116	b3430	glgC	G	glucose-1-phosphate adenylyltransferase	PWYS_GLYCOGENSYNTH-PWY - TFs-RGPs_PC00004
	116	b3431	glgX	G	glycogen debranching enzyme
	116	b3432	glgB	G	glycogen branching enzyme	PWYS_GLYCOGENSYNTH-PWY
	117	b2818	argA	E	N-acetylglutamate synthase	PWYS_ARGSYN-PWY
	117	b2819	recD	L	DNA helicase, ATP-dependent dsDNA/ssDNA exonuclease V subunit, ssDNA endonuclease	PCs_RECBCD
	117	b2820	recB	L	DNA helicase, ATP-dependent dsDNA/ssDNA exonuclease V subunit, ssDNA endonuclease	PCs_RECBCD
	117	b2821	ptr	O	protease III
	117	b2822	recC	L	DNA helicase, ATP-dependent dsDNA/ssDNA exonuclease V subunit, ssDNA endonuclease	PCs_RECBCD
	118	b3494	yhiO	-	universal stress protein UspB
	118	b3495	uspA	T	universal stress protein A	TFs-RGPs_PD01520
	118	b3922	yiiS	S	hypothetical protein
	118	b3923	yiiT	T	putative regulator
	118	b4116	adiY	K	putative ARAC-type regulatory protein	TFs-RGPs_EG11966-MONOMER
	119	b3706	trmE	R	tRNA modification GTPase
	119	b3742	mioC	C	flavodoxin
	119	b3741	gidA	D	glucose-inhibited division protein A
	119	b3744	asnA	E	asparagine synthetase AsnA	PWYS_ASPARAGINESYN-PWY - TFs-RGPs_PD00250
	119	b3743	asnC	K	regulator for asnA, asnC and gidA	TFs-RGPs_G7072-MONOMER - TFs-RGPs_PD00250
	120	b4013	metA	E	homoserine O-succinyltransferase	PWYS_HOMOSER-METSYN-PWY - TFs-RGPs_PD03938 - TFs-RGPs_PD04032
	120	b4014	aceB	C	malate synthase	PWYS_GLYOXYLATE-BYPASS - TFs-RGPs_ARCA-MONOMER - TFs-RGPs_PC00027 - TFs-RGPs_PC00061 - TFs-RGPs_PD04099
	120	b4015	aceA	C	isocitrate lyase	PWYS_GLYOXYLATE-BYPASS - TFs-RGPs_ARCA-MONOMER - TFs-RGPs_PC00027 - TFs-RGPs_PC00061 - TFs-RGPs_PD04099
	120	b4016	aceK	T	bifunctional isocitrate dehydrogenase kinase/phosphatase protein	TFs-RGPs_ARCA-MONOMER - TFs-RGPs_PC00027 - TFs-RGPs_PC00061 - TFs-RGPs_PD04099
	120	b4018	iclR	K	repressor of aceBA operon	TFs-RGPs_PD01520 - TFs-RGPs_PD04099
	121	b0002	thrA	E	bifunctional aspartokinase I/homeserine dehydrogenase I	PWYS_HOMOSERSYN-PWY
	121	b0003	thrB	E	homoserine kinase	PWYS_HOMOSER-THRESYN-PWY
	121	b0004	thrC	E	threonine synthase	PWYS_HOMOSER-THRESYN-PWY
	121	b3433	asd	E	aspartate-semialdehyde dehydrogenase	PWYS_DAPLYSINESYN-PWY - PWYS_HOMOSERSYN-PWY
	122	b0008	talB	G	transaldolase	PWYS_NONOXIPENT-PWY
	122	b2464	talA	G	transaldolase	PWYS_NONOXIPENT-PWY
	122	b2465	tktB	G	transketolase	PWYS_DRIBOPMET-PWY - PWYS_NONOXIPENT-PWY - PWYS_RIBOKIN-PWY
	122	b2935	tktA	G	transketolase	PWYS_DRIBOPMET-PWY - PWYS_NONOXIPENT-PWY - PWYS_RIBOKIN-PWY
	123	b0015	dnaJ	O	chaperone with DnaK; heat shock protein	PCs_HSP70-CPLX
	123	b2829	ptsP	T	PTS family enzyme I, transcriptional regulator (with NPR and NTR proteins)
	123	b0710	ybgI	S	hypothetical protein
	123	b3560	glyQ	J	glycyl-tRNA synthetase alpha subunit	PCs_GLYS-CPLX - PWYS_TRNA-CHARGING-PWY
	124	b3340	fusA	J	elongation factor EF-2
	124	b1740	nadE	H	NAD(+) synthetase	PWYS_PYRIDNUCSYN-PWY - PWYS_PYRNUCYC-PWY
	124	b2298	yfcC	S	putative S-transferase
	124	b3967	murI	M	glutamate racemase	PWYS_PEPTIDOGLYCANSYN-PWY
	125	b3172	argG	E	argininosuccinate synthase	PWYS_ARGSYN-PWY - TFs-RGPs_PC00004 - TFs-RGPs_PC00005
	125	b0273	argF	E	ornithine carbamoyltransferase	PWYS_ARGSYN-PWY - TFs-RGPs_PC00005
	125	b0521	arcC	E	carbamate kinase
	125	b4254	argI	E	ornithine carbamoyltransferase	PWYS_ARGSYN-PWY - TFs-RGPs_PC00005
	126	b0041	fixA	C	putative electron transfer flavoprotein subunit beta	TFs-RGPs_G6088-MONOMER - TFs-RGPs_PC00004
	126	b0042	fixB	C	putative electron transfer flavoprotein subunit alpha	TFs-RGPs_G6088-MONOMER - TFs-RGPs_PC00004
	126	b0044	fixX	C	putative ferredoxin	TFs-RGPs_G6088-MONOMER - TFs-RGPs_PC00004
	126	b1697	ydiQ	C	putative electron transfer flavoprotein subunit beta
	127	b3035	tolC	MU	outer membrane channel precursor protein	PCs_CPLX0-2121 - PCs_CPLX0-2141 - PCs_CPLX0-2161 - PCs_TRANS-200-CPLX - PCs_TRANS-CPLX-201 - PCs_TRANS-CPLX-202
	127	b0463	acrA	M	acridine efflux pump	PCs_TRANS-CPLX-201 - TFs-RGPs_PD00365 - TFs-RGPs_PD00406
	127	b0462	acrB	V	acridine efflux pump	PCs_TRANS-CPLX-201 - TFs-RGPs_PD00365 - TFs-RGPs_PD00406
	127	b3265	acrE	M	transmembrane protein affecting septum formation and cell membrane permeability	PCs_CPLX0-2141
	128	b0231	dinB	L	DNA polymerase IV
	128	b0232	yafN	D	hypothetical protein
	128	b0233	yafO	-	hypothetical protein
	128	b0234	yafP	K	putative acyltransferase
	129	b3583	sgbE	G	L-ribulose-5-phosphate 4-epimerase	PWYS_PWY0-301 - TFs-RGPs_EG12278-MONOMER - TFs-RGPs_PC00004 - TFs-RGPs_PC00027
	129	b3581	sgbH	G	3-keto-L-gulonate 6-phosphate decarboxylase	PWYS_PWY0-301 - TFs-RGPs_EG12278-MONOMER - TFs-RGPs_PC00004 - TFs-RGPs_PC00027
	129	b3582	sgbU	G	3-epimerase	TFs-RGPs_EG12278-MONOMER - TFs-RGPs_PC00004 - TFs-RGPs_PC00027
	129	b4197	sgaU	G	L-xylulose 5-phosphate 3-epimerase	PWYS_PWY0-301 - TFs-RGPs_G7854-MONOMER - TFs-RGPs_PC00004 - TFs-RGPs_PC00027
	130	b1136	icdA	C	isocitrate dehydrogenase	PWYS_ANARESP1-PWY - PWYS_TCA - TFs-RGPs_ARCA-MONOMER - TFs-RGPs_PC00061 - TFs-RGPs_PD00197
	130	b0720	gltA	C	citrate synthase	PWYS_ANARESP1-PWY - PWYS_GLYOXYLATE-BYPASS - PWYS_TCA - TFs-RGPs_ARCA-MONOMER - TFs-RGPs_PC00004 - TFs-RGPs_PC00027
	130	b2700	ygaD	R	competence damage-inducible protein A
	130	b3472	dcrB	-	periplasmic protein; required for phage C1 adsorption
	131	b0924	mukB	D	condesin subunit B	PCs_CPLX0-2561 - TFs-RGPs_PD00288
	131	b0921	smtA	Q	S-adenosylmethionine-dependent methyltransferase	TFs-RGPs_PD00288
	131	b0922	mukF	D	condesin subunit F	PCs_CPLX0-2561 - TFs-RGPs_PD00288
	131	b0923	mukE	D	condesin subunit E	PCs_CPLX0-2561 - TFs-RGPs_PD00288
	132	b1176	minC	D	septum formation inhibitor
	132	b1175	minD	D	cell division inhibitor, a membrane ATPase, activates minC
	132	b1174	minE	D	cell division topological specificity factor MinE
	132	b1575	dicB	-	Qin prophage; inhibitior of cell division
	133	b3327	gspF	NU	putative export protein F for general secretion pathway (GSP)	PCs_CPLX0-3382
	133	b2950	yggR	NU	putative protein transport
	133	b3325	gspD	NU	putative export protein D for general secretion pathway (GSP)	PCs_CPLX0-3382
	133	b3326	gspE	NU	putative export protein E for general secretion pathway (GSP); Type II traffic warden ATPase	PCs_CPLX0-3382
	134	b0109	nadC	H	nicotinate-nucleotide pyrophosphorylase	PWYS_PYRIDNUCSYN-PWY
	134	b0750	nadA	H	quinolinate synthetase	PCs_QUINOLINATE-SYNTHE-MULTI-CPLX - PWYS_PYRIDNUCSYN-PWY
	134	b2574	nadB	H	L-aspartate oxidase	PCs_QUINOLINATE-SYNTHE-MULTI-CPLX - PWYS_PYRIDNUCSYN-PWY - TFs-RGPs_PD04413
	134	b2568	lepB	U	leader peptidase (signal peptidase I)
	135	b0727	sucB	C	dihydrolipoamide acetyltransferase	PCs_2OXOGLUTARATEDEH-CPLX - PWYS_TCA - TFs-RGPs_ARCA-MONOMER - TFs-RGPs_PC00004 - TFs-RGPs_PC00027 - TFs-RGPs_PD00197
	135	b0726	sucA	C	2-oxoglutarate decarboxylase, component of the 2-oxoglutarate dehydrogenase complex, thiamin-binding	PCs_2OXOGLUTARATEDEH-CPLX - PWYS_TCA - TFs-RGPs_ARCA-MONOMER - TFs-RGPs_PC00004 - TFs-RGPs_PC00027 - TFs-RGPs_PD00197
	135	b0729	sucD	C	succinyl-CoA synthetase alpha subunit	PCs_SUCCCOASYN - PWYS_TCA - TFs-RGPs_ARCA-MONOMER - TFs-RGPs_PC00004 - TFs-RGPs_PC00027 - TFs-RGPs_PD00197
	135	b0728	sucC	C	succinyl-CoA synthetase subunit beta	PCs_SUCCCOASYN - PWYS_TCA - TFs-RGPs_ARCA-MONOMER - TFs-RGPs_PC00004 - TFs-RGPs_PC00027 - TFs-RGPs_PD00197
	136	b0176	yaeL	M	membrane-associated protease
	136	b0185	accA	I	acetyl-CoA carboxylase alpha subunit	PCs_ACETYL-COA-CARBOXYLMULTI-CPLX - PCs_ACETYL-COA-CARBOXYLTRANSFER-CPLX - PWYS_FASYN-INITIAL-PWY
	136	b3255	accB	I	acetyl-CoA carboxylase	PCs_ACETYL-COA-CARBOXYLMULTI-CPLX - PWYS_FASYN-INITIAL-PWY
	136	b3256	accC	I	acetyl-CoA carboxylase	PCs_ACETYL-COA-CARBOXYLMULTI-CPLX - PWYS_FASYN-INITIAL-PWY
	137	b2699	recA	L	recombinase A	TFs-RGPs_PC00010
	137	b1061	dinI	-	DNA damage-inducible protein I, inhibits UmuD processing
	137	b2688	gshA	H	glutamate--cysteine ligase	PWYS_GLUTATHIONESYN-PWY
	137	b2698	recX	R	RecA regulator RecX	TFs-RGPs_PC00010
	138	b0334	prpD	R	2-methylcitrate dehydratase	PWYS_PWY0-42
	138	b2727	hypB	OK	guanine-nucleotide binding protein, functions as nickel donor for large subunit of hydrogenase 3	TFs-RGPs_PC00027 - TFs-RGPs_PD00197 - TFs-RGPs_PD02936
	138	b2395	yfeA	T	hypothetical protein
	138	b2728	hypC	O	hydrogenase expression/formation protein	TFs-RGPs_PC00027 - TFs-RGPs_PD00197 - TFs-RGPs_PD02936
	139	b0365	tauA	P	taurine transport protein (ABC superfamily, peri_bind)	PCs_ABC-64-CPLX - TFs-RGPs_G7071-MONOMER - TFs-RGPs_PC00040
	139	b0366	tauB	P	taurine ATP-binding component of a transport system	PCs_ABC-64-CPLX - TFs-RGPs_G7071-MONOMER - TFs-RGPs_PC00040
	139	b0367	tauC	P	taurine transport protein (ABC superfamily, membrane)	PCs_ABC-64-CPLX - TFs-RGPs_G7071-MONOMER - TFs-RGPs_PC00040
	139	b0801	ybiC	C	putative dehydrogenase
	140	b2786	barA	T	hybrid sensory histidine kinase in two-component regulatory system with UvrY	PWYS_OMP-PWY - PWYS_PWY0-21
	140	b3210	arcB	T	aerobic respiration sensor-response protein; histidine protein kinase/phosphatase, sensor for arcA	PWYS_ARCB-PWY
	140	b4401	arcA	TK	negative response regulator of genes in aerobic pathways, (sensors, ArcB and CpxA)	PWYS_ARCB-PWY - TFs-RGPs_ARCA-MONOMER - TFs-RGPs_PD00197
	140	b4393	trpR	K	Trp operon repressor	TFs-RGPs_PC00007
	141	b3405	ompR	TK	osmolarity response regulator	PWYS_OMP-PWY - TFs-RGPs_PC00004 - TFs-RGPs_PC00027 - TFs-RGPs_PC00029
	141	b0995	torR	TK	response regulator in two-component regulatory system with TorS, regulates TMAO reductase regulatory system I (torCAD)	PWYS_TOR-PWY - TFs-RGPs_TORR-CPLX
	141	b3404	envZ	T	osmolarity sensor protein	PWYS_OMP-PWY - TFs-RGPs_PC00004 - TFs-RGPs_PC00027
	141	b3403	pckA	C	phosphoenolpyruvate carboxykinase	PWYS_GLUCONEO-PWY - TFs-RGPs_PD00521
	142	b3724	phoU	P	negative regulator for pho regulon and putative enzyme in phosphate metabolism	TFs-RGPs_PC00027 - TFs-RGPs_PHOB-MONOMER
	142	b3726	pstA	P	high-affinity phosphate transport protein (ABC superfamily, membrane)	PCs_ABC-27-CPLX - TFs-RGPs_PC00027 - TFs-RGPs_PHOB-MONOMER
	142	b3727	pstC	P	high-affinity phosphate transport protein (ABC superfamily, membrane)	PCs_ABC-27-CPLX - TFs-RGPs_PC00027 - TFs-RGPs_PHOB-MONOMER
	142	b3728	pstS	P	high-affinity phosphate transport protein (ABC superfamily, peri_bind)	PCs_ABC-27-CPLX - TFs-RGPs_PC00027 - TFs-RGPs_PHOB-MONOMER
	143	b4003	zraS	T	sensor kinase of Zn/Pb responsive two-component regulatory system	PWYS_HYD-PWY - TFs-RGPs_HYDG-MONOMER
	143	b4004	zraR	T	response regulator in two-component reguatory system with ZraS, regulates zraP expression (EBP family)	PWYS_HYD-PWY - TFs-RGPs_HYDG-MONOMER
	143	b2219	atoS	T	sensor protein AtoS for response regulator AtoC	PWYS_ATO-PWY
	143	b4002	zraP	UNTP	Zn-binding periplasmic protein
	144	b0405	queA	J	S-adenosylmethionine:tRNA ribosyltransferase-isomerase	TFs-RGPs_PD00196
	144	b0407	yajC	U	preprotein translocase subunit YajC	PCs_SEC-SECRETION-CPLX - PCs_SECD-SECF-YAJC-YIDC-CPLX
	144	b0408	secD	U	protein export protein SecD	PCs_SEC-SECRETION-CPLX - PCs_SECD-SECF-YAJC-YIDC-CPLX
	144	b0409	secF	U	protein export protein SecF	PCs_SEC-SECRETION-CPLX - PCs_SECD-SECF-YAJC-YIDC-CPLX
	145	b0426	yajQ	S	hypothetical protein
	145	b0996	torC	C	cytochrome c-type protein in TMAO respiration; with TorA, also negativer regulator of tor operon	PCs_TMAOREDUCTI-CPLX - PWYS_ANARESPACC-PWY - TFs-RGPs_NARL-MONOMER - TFs-RGPs_TORR-CPLX
	145	b0997	torA	C	trimethylamine N-oxide reductase subunit	PCs_TMAOREDUCTI-CPLX - PWYS_ANARESPACC-PWY - TFs-RGPs_NARL-MONOMER - TFs-RGPs_TORR-CPLX
	145	b0998	torD	R	chaperone protein TorD	TFs-RGPs_NARL-MONOMER - TFs-RGPs_TORR-CPLX
	146	b0428	cyoE	O	protoheme IX farnesyltransferase	PWYS_HEMESYN2-PWY - TFs-RGPs_ARCA-MONOMER - TFs-RGPs_EG11544-MONOMER - TFs-RGPs_PD00197
	146	b0430	cyoC	C	cytochrome o ubiquinol oxidase subunit III	PCs_CYT-O-UBIOX-CPLX - TFs-RGPs_ARCA-MONOMER - TFs-RGPs_EG11544-MONOMER - TFs-RGPs_PD00197
	146	b0431	cyoB	C	cytochrome o ubiquinol oxidase subunit I	PCs_CYT-O-UBIOX-CPLX - TFs-RGPs_ARCA-MONOMER - TFs-RGPs_EG11544-MONOMER - TFs-RGPs_PD00197
	146	b0432	cyoA	C	cytochrome o ubiquinol oxidase subunit II	PCs_CYT-O-UBIOX-CPLX - TFs-RGPs_ARCA-MONOMER - TFs-RGPs_EG11544-MONOMER - TFs-RGPs_PD00197
	147	b0436	tig	O	trigger factor
	147	b2330	yfcB	J	putative adenine-specific methylase
	147	b1854	pykA	G	pyruvate kinase	PWYS_ANARESP1-PWY - PWYS_FERMENTATION-PWY - PWYS_GLYCOLYSIS
	147	b3633	kdtA	M	3-deoxy-D-manno-octulosonic-acid transferase	PWYS_KDOSYN-PWY - PWYS_NAGLIPASYN-PWY
	148	b0497	rhsD	M	RhsD protein in RhsD element
	148	b0700	rhsC	M	RhsC protein in RhsC element
	148	b3482	rhsB	M	RhsB protein in RhsB element
	148	b3593	rhsA	M	RhsA protein in RhsA element
	149	b3025	ygiX	TK	putative 2-component transcriptional regulator	TFs-RGPs_G7575-MONOMER
	149	b4113	basR	TK	response regulator in two-component regulatory system with BasS (OmpR family)	PWYS_BAS-PWY
	149	b3026	ygiY	T	putative 2-component sensor protein
	149	b4112	basS	T	sensor protein for basR	PWYS_BAS-PWY
	150	b0615	citF	C	citrate lyase alpha chain	PCs_ACECITLY-CPLX - PCs_CITLY-CPLX
	150	b0616	citE	G	citrate lyase beta chain (acyl lyase subunit)	PCs_ACECITLY-CPLX - PCs_CITLY-CPLX
	150	b0617	citD	C	citrate lyase acyl carrier protein (gamma chain)	PCs_ACECITLY-CPLX - PCs_CITLY-CPLX
	150	b0618	citC	C	citrate lyase synthetase (citrate (pro-3S)-lyase ligase
	151	b2232	ubiG	H	3-demethylubiquinone-9 3-methyltransferase	PWYS_UBISYN-PWY - TFs-RGPs_PC00004
	151	b2907	ubiH	HC	2-octaprenyl-6-methoxyphenyl hydroxylase	PWYS_UBISYN-PWY
	151	b4040	ubiA	H	4-hydroxybenzoate octaprenyltransferase	PWYS_UBISYN-PWY - TFs-RGPs_PC00027 - TFs-RGPs_PD00197
	151	b2906	visC	HC	hypothetical protein
	152	b1101	ptsG	G	PTS family enzyme IIC (N-terminal); enzyme IIB (C-terminal), glucose-specific	PCs_CPLX-157 - TFs-RGPs_ARCA-MONOMER - TFs-RGPs_PC00004 - TFs-RGPs_PD00196 - TFs-RGPs_PD01896
	152	b1621	malX	G	PTS family enzyme IIC (N-terminal); enzyme IIB (C-terminal), maltose/glucose-specific	PCs_CPLX-164 - TFs-RGPs_PC00004 - TFs-RGPs_PD00361
	152	b1594	mlc	KG	putative NAGC-like transcriptional regulator	TFs-RGPs_PC00004 - TFs-RGPs_PD01896
	152	b1622	malY	E	bifunctional: PLP-dependent beta-cystathionase; repressor of maltose regulon through interaction with MalT	PWYS_HOMOSER-METSYN-PWY - TFs-RGPs_PC00004 - TFs-RGPs_PD00361
	153	b2311	ubiX	H	3-octaprenyl-4-hydroxybenzoate carboxy-lyase	PWYS_UBISYN-PWY - TFs-RGPs_PC00033
	153	b2601	aroF	E	3-deoxy-7-phosphoheptulonate synthase	PWYS_ARO-PWY - TFs-RGPs_PD00413
	153	b2599	pheA	E	bifunctional: chorismate mutase P (N-terminal); prephenate dehydratase (C-terminal)	PWYS_PHESYN - PWYS_TYRSYN
	153	b2600	tyrA	E	bifunctional: chorismate mutase T (N-terminal); prephenate dehydrogenase (C-terminal)	PWYS_PHESYN - PWYS_TYRSYN - TFs-RGPs_PD00413
	154	b0724	sdhB	C	succinate dehydrogenase catalytic subunit	PCs_CPLX0-646 - PCs_SUCC-DEHASE - PWYS_AERESPDON-PWY - PWYS_TCA - TFs-RGPs_ARCA-MONOMER - TFs-RGPs_PC00004 - TFs-RGPs_PD00197
	154	b0721	sdhC	C	succinate dehydrogenase cytochrome b556 large membrane subunit	PCs_CPLX0-647 - PCs_SUCC-DEHASE - PWYS_AERESPDON-PWY - PWYS_TCA - TFs-RGPs_ARCA-MONOMER - TFs-RGPs_PC00004 - TFs-RGPs_PD00197
	154	b0722	sdhD	C	succinate dehydrogenase cytochrome b556 small membrane subunit	PCs_CPLX0-647 - PCs_SUCC-DEHASE - PWYS_AERESPDON-PWY - PWYS_TCA - TFs-RGPs_ARCA-MONOMER - TFs-RGPs_PC00004 - TFs-RGPs_PD00197
	154	b0723	sdhA	C	succinate dehydrogenase catalytic subunit	PCs_CPLX0-646 - PCs_SUCC-DEHASE - PWYS_AERESPDON-PWY - PWYS_TCA - TFs-RGPs_ARCA-MONOMER - TFs-RGPs_PC00004 - TFs-RGPs_PD00197
	155	b3006	exbB	U	uptake of enterobactin; tonB-dependent uptake of B colicins	PCs_CPLX0-1862 - PCs_CPLX0-1923 - PCs_CPLX0-1924 - PCs_CPLX0-1941 - PCs_CPLX0-1942 - PCs_CPLX0-1943 - PCs_CPLX0-1944 - PCs_CPLX0-1981 - PCs_CPLX0-2001 - TFs-RGPs_PC00009 - TFs-RGPs_PD00260
	155	b3005	exbD	U	uptake of enterobactin; tonB-dependent uptake of B colicins	PCs_CPLX0-1862 - PCs_CPLX0-1923 - PCs_CPLX0-1924 - PCs_CPLX0-1941 - PCs_CPLX0-1942 - PCs_CPLX0-1943 - PCs_CPLX0-1944 - PCs_CPLX0-1981 - PCs_CPLX0-2001 - TFs-RGPs_PC00009 - TFs-RGPs_PD00260
	155	b1676	pykF	G	pyruvate kinase	PWYS_ANARESP1-PWY - PWYS_FERMENTATION-PWY - PWYS_GLYCOLYSIS - TFs-RGPs_PC00061
	155	b1241	adhE	C	CoA-linked acetaldehyde dehydrogenase and iron-dependent alcohol dehydrogenase; pyruvate-formate-lyase deactivase	PWYS_ETOH-ACETYLCOA-ANA-PWY - PWYS_FERMENTATION-PWY - TFs-RGPs_NARL-MONOMER - TFs-RGPs_PC00061 - TFs-RGPs_PD00196 - TFs-RGPs_PD00197
	156	b0756	galM	G	galactose-1-epimerase (mutarotase)	PWYS_GALACTMETAB-PWY - TFs-RGPs_CPLX0-2021 - TFs-RGPs_PC00004 - TFs-RGPs_PD00288 - TFs-RGPs_PD03028
	156	b0757	galK	G	galactokinase	PWYS_COLANSYN-PWY - PWYS_GALACTMETAB-PWY - TFs-RGPs_CPLX0-2021 - TFs-RGPs_PC00004 - TFs-RGPs_PD00288 - TFs-RGPs_PD03028
	156	b0758	galT	C	galactose-1-phosphate uridylyltransferase	PWYS_COLANSYN-PWY - PWYS_GALACTMETAB-PWY - TFs-RGPs_CPLX0-2021 - TFs-RGPs_PC00004 - TFs-RGPs_PD00288 - TFs-RGPs_PD03028
	156	b0759	galE	M	UDP-galactose 4-epimerase	PWYS_COLANSYN-PWY - PWYS_GALACTMETAB-PWY - TFs-RGPs_CPLX0-2021 - TFs-RGPs_PC00004 - TFs-RGPs_PD00288 - TFs-RGPs_PD03028
	157	b0908	aroA	E	3-phosphoshikimate 1-carboxyvinyltransferase	PWYS_ARO-PWY - TFs-RGPs_PD00353
	157	b2329	aroC	E	chorismate synthase	PWYS_ARO-PWY
	157	b3389	aroB	E	3-dehydroquinate synthase	PWYS_ARO-PWY
	157	b3390	aroK	-	shikimate kinase I	PWYS_ARO-PWY
	158	b0918	kdsB	M	3-deoxy-manno-octulosonate cytidylyltransferase	PWYS_KDOSYN-PWY - PWYS_NAGLIPASYN-PWY
	158	b0914	msbA	V	ATP-binding transport protein; multicopy suppressor of htrB
	158	b0915	lpxK	M	tetraacyldisaccharide 4'-kinase	PWYS_KDOSYN-PWY - PWYS_NAGLIPASYN-PWY
	158	b0917	ycaR	S	unknown CDS
	159	b0933	ssuB	P	alkanesulfonate transport protein (ABC superfamily, atp_bind)	PCs_ABC-56-CPLX
	159	b0934	ssuC	P	alkanesulfonate transport protein (ABC superfamily, membrane)	PCs_ABC-56-CPLX
	159	b0935	ssuD	C	alkanesulfonate monooxygenase	PWYS_ALKANEMONOX-PWY
	159	b0936	ssuA	P	alkanesulfonate transport protein (ABC superfamily, peri_bind)	PCs_ABC-56-CPLX
	160	b0950	pqiA	S	paraquat-inducible protein A	TFs-RGPs_PD00365 - TFs-RGPs_PD00406
	160	b0951	pqiB	R	paraquat-inducible protein B	TFs-RGPs_PD00365 - TFs-RGPs_PD00406
	160	b1834	yebT	R	hypothetical protein
	160	b1833	yebS	S	hypothetical protein
	161	b0966	yccV	S	hypothetical protein
	161	b3440	yhhX	R	putative NAD(P)-binding dehydrogenase	TFs-RGPs_PC00009
	161	b3345	yheN	P	hypothetical protein
	161	b3439	yhhW	R	hypothetical protein
	162	b0972	hyaA	C	hydrogenase-1 small subunit	PCs_FORMHYDROGI-CPLX - PWYS_ANARESPDON-PWY - TFs-RGPs_ARCA-MONOMER - TFs-RGPs_NARL-MONOMER - TFs-RGPs_NARP-MONOMER - TFs-RGPs_PD00967
	162	b0973	hyaB	C	hydrogenase-1 large subunit	PCs_FORMHYDROGI-CPLX - PWYS_ANARESPDON-PWY - TFs-RGPs_ARCA-MONOMER - TFs-RGPs_NARL-MONOMER - TFs-RGPs_NARP-MONOMER - TFs-RGPs_PD00967
	162	b2997	hybO	C	hydrogenase-2, small chain	PCs_FORMHYDROG2-CPLX - PWYS_ANARESPDON-PWY - TFs-RGPs_ARCA-MONOMER - TFs-RGPs_NARL-MONOMER
	162	b1209	lolB	M	outer membrane lipoprotein LolB precursor
	163	b0976	hyaE	-	processing of HyaA and HyaB proteins	TFs-RGPs_ARCA-MONOMER - TFs-RGPs_NARL-MONOMER - TFs-RGPs_NARP-MONOMER - TFs-RGPs_PD00967
	163	b0975	hyaD	C	processing of HyaA and HyaB proteins	TFs-RGPs_ARCA-MONOMER - TFs-RGPs_NARL-MONOMER - TFs-RGPs_NARP-MONOMER - TFs-RGPs_PD00967
	163	b0977	hyaF	-	nickel incorporation into hydrogenase-1 proteins	TFs-RGPs_ARCA-MONOMER - TFs-RGPs_NARL-MONOMER - TFs-RGPs_NARP-MONOMER - TFs-RGPs_PD00967
	163	b2970	yghF	U	putative general secretion pathway for protein export (GSP)
	164	b3888	yiiD	K	putative acetyltransferase
	164	b4168	yjeE	R	putative enzyme
	164	b4167	yjeF	SG	putative kinase
	164	b4180	yjfH	J	Gm2251 methyltransferase of 23S rRNA
	165	b1114	mfd	LK	transcription-repair ATP-dependent coupling factor
	165	b1204	pth	J	peptidyl-tRNA hydrolase
	165	b1203	ychF	J	putative GTP-binding protein
	165	b1205	ychH	-	hypothetical protein
	166	b1131	purB	F	adenylosuccinate lyase	PWYS_DENOVOPURINE2-PWY - TFs-RGPs_PC00033
	166	b1132	ycfC	R	hypothetical protein	TFs-RGPs_PC00033
	166	b1133	trmU	J	tRNA (5-methylaminomethyl-2-thiouridylate)-methyltransferase
	166	b3183	yhbZ	R	putative GTP-binding factor
	167	b3669	uhpA	TK	response regulator (activator) in two-component regulatory system wtih UhpB, regulates uhpT expression (LuxR/UhpA family)	PWYS_UHP-PWY - TFs-RGPs_UHPA-MONOMER
	167	b3666	uhpT	G	hexose phosphate transport protein	TFs-RGPs_PC00004 - TFs-RGPs_UHPA-MONOMER
	167	b3667	uhpC	G	membrane protein which senses glucose-6-phosphate, interacts with UhpB and UhpA, regulates uhpT expression	PWYS_UHP-PWY
	167	b3668	uhpB	T	sensor histidine protein kinase phosphorylates UhpA	PWYS_UHP-PWY
	168	b1250	kch	P	putative potassium channel protein
	168	b2528	iscA	S	iron-sulfur cluster assembly protein	TFs-RGPs_G7326-MONOMER
	168	b2524	yfhJ	S	putative protein believed to be involved in assembly of Fe-S clusters
	168	b2525	fdx	C	[2FE-2S] ferredoxin, electron carrer protein
	169	b4291	fecA	P	KpLE2 phage-like element; outer membrane porin, receptor for ferric citrate, in multi-component regulatory system with cytoplasmic FecI (sigma factor) and membrane-bound FecR	PCs_CPLX0-1943 - PCs_CPLX0-2001 - TFs-RGPs_PC00009 - TFs-RGPs_PD00260 - TFs-RGPs_PD00440
	169	b4293	fecI	K	RNA polymerase sigma-70 factor	PCs_CPLX0-221 - TFs-RGPs_PC00009 - TFs-RGPs_PD00440
	169	b4290	fecB	P	KpLE2 phage-like element; citrate-dependent iron (III) transport protein (ABC superfamily, peri_bind)	PCs_ABC-9-CPLX - PCs_CPLX0-2001 - TFs-RGPs_PC00009 - TFs-RGPs_PD00260 - TFs-RGPs_PD00440
	169	b4292	fecR	PT	KpLE2 phage-like element; membrane-bound regulator in multi-component regulatory system with cytoplasmic FecI (sigma factor) and FecA (outer membrane receptor)	TFs-RGPs_PC00009 - TFs-RGPs_PD00440
	170	b1258	yciF	S	putative structural proteins
	170	b2426	ucpA	IQ	short chain dehydrogenase
	170	b1825	yebO	-	hypothetical protein
	170	b3945	gldA	C	glycerol dehydrogenase	PWYS_GLYCEROLMETAB-PWY
	171	b1449	yncB	R	putative dehydrogenase, NAD(P)-binding
	171	b4211	ytfG	MG	putative oxidoreductase
	171	b4252	yjgK	G	hypothetical protein
	171	b4263	yjgR	R	putative enzyme contains P-loop containing nucleotide triphosphate hydrolase domain
	172	b3131	agaR	KG	putative DEOR-type transcriptional regulator of aga operon	TFs-RGPs_G7630-MONOMER
	172	b3132	agaZ	G	putative tagatose 6-phosphate kinase 2	PCs_CPLX0-240 - PWYS_GALACTITOLCAT-PWY - TFs-RGPs_G7630-MONOMER - TFs-RGPs_PC00004
	172	b3136	agaS	M	putative tagatose-6-phosphate aldose/ketose isomerase	TFs-RGPs_G7630-MONOMER
	172	b3137	agaY	G	tagatose 1,6-diphosphate aldolase	PCs_CPLX0-240 - PWYS_GALACTITOLCAT-PWY - TFs-RGPs_G7630-MONOMER
	173	b3098	yqjD	S	hypothetical protein
	173	b2672	ygaM	S	hypothetical protein
	173	b1109	ndh	C	respiratory NADH dehydrogenase	PWYS_AERESPDON-PWY - PWYS_ANARESPDON-PWY - TFs-RGPs_ARCA-MONOMER - TFs-RGPs_PC00027 - TFs-RGPs_PD00196 - TFs-RGPs_PD00197
	173	b2266	elaB	S	unknown CDS
	174	b1872	torZ	C	TMAO-reductase	PCs_CPLX-63 - PWYS_ANARESPACC-PWY
	174	b1873	torY	C	cytochrome c-type protein in TMAO system III with TorZ	PCs_CPLX-63 - PWYS_ANARESPACC-PWY
	174	b3551	bisC	C	biotin sulfoxide reductase
	174	b4079	fdhF	C	formate dehydrogenase H, selenopolypeptide subunit	PCs_FHLMULTI-CPLX - PWYS_ANARESP1-PWY - PWYS_FERMENTATION-PWY - TFs-RGPs_NARL-MONOMER - TFs-RGPs_PD02936
	175	b3612	yibO	G	phosphoglyceromutase	PWYS_GLUCONEO-PWY - PWYS_GLYCOLYSIS
	175	b3021	ygiT	K	putative regulator
	175	b3898	frvX	G	frv operon protein
	175	b4244	pyrI	F	aspartate carbamoyltransferase regulatory subunit	PCs_ASPCARBTRANS-CPLX - PWYS_PWY0-162
	176	b2148	mglC	G	beta-methylgalactoside transporter inner membrane component	PCs_ABC-18-CPLX - TFs-RGPs_EG10320-MONOMER - TFs-RGPs_PC00004 - TFs-RGPs_PD00261
	176	b2149	mglA	G	ATP-binding component of methyl-galactoside transport and galactose taxis	PCs_ABC-18-CPLX - TFs-RGPs_EG10320-MONOMER - TFs-RGPs_PC00004 - TFs-RGPs_PD00261
	176	b2150	mglB	G	galactose transport protein (ABC superfamily, peri_bind)	PCs_ABC-18-CPLX - TFs-RGPs_EG10320-MONOMER - TFs-RGPs_PC00004 - TFs-RGPs_PD00261
	176	b2151	galS	K	mgl repressor, galactose operon inducer	TFs-RGPs_PC00004 - TFs-RGPs_PD00261 - TFs-RGPs_PD03028
	177	b2202	napC	C	cytochrome c-type protein	PCs_CPLX0-3243 - PCs_NAP-CPLX - PWYS_ANARESPACC-PWY - TFs-RGPs_MONOMER0-185 - TFs-RGPs_NARL-MONOMER - TFs-RGPs_NARP-MONOMER - TFs-RGPs_PD00197
	177	b2204	napH	C	quinol dehydrogenase membrane component	PCs_CPLX0-3241 - PCs_NAP-CPLX - PWYS_ANARESPACC-PWY - TFs-RGPs_MONOMER0-185 - TFs-RGPs_NARL-MONOMER - TFs-RGPs_NARP-MONOMER - TFs-RGPs_PD00197
	177	b2208	napF	C	Fe-S ferredoxin-type protein, electron transfer	TFs-RGPs_MONOMER0-185 - TFs-RGPs_NARL-MONOMER - TFs-RGPs_NARP-MONOMER - TFs-RGPs_PD00197
	177	b2205	napG	C	quinol dehydrogenase periplasmic component	PCs_CPLX0-3241 - PCs_NAP-CPLX - PWYS_ANARESPACC-PWY - TFs-RGPs_MONOMER0-185 - TFs-RGPs_NARL-MONOMER - TFs-RGPs_NARP-MONOMER - TFs-RGPs_PD00197
	178	b3423	glpR	KG	repressor of the glp operon	TFs-RGPs_PC00004 - TFs-RGPs_PD03576
	178	b3426	glpD	C	sn-glycerol-3-phosphate dehydrogenase (aerobic)	PWYS_AERESPDON-PWY - PWYS_PWY0-381 - TFs-RGPs_ARCA-MONOMER - TFs-RGPs_PC00004 - TFs-RGPs_PD03576
	178	b3424	glpG	R	protein of glp regulon	TFs-RGPs_PC00004
	178	b3425	glpE	P	thiosulfate sulfurtransferase	TFs-RGPs_PC00004
	179	b3926	glpK	C	glycerol kinase	PWYS_PWY0-381 - TFs-RGPs_PC00004 - TFs-RGPs_PD03576
	179	b3927	glpF	G	MIP channel, glycerol diffusion	TFs-RGPs_PC00004 - TFs-RGPs_PD03576
	179	b3924	fpr	C	ferredoxin-NADP reductase	PCs_NRDACTMULTI-CPLX - TFs-RGPs_PD00365 - TFs-RGPs_PD00406
	179	b3925	glpX	G	fructose 1,6-bisphosphatase II	PWYS_GLUCONEO-PWY - TFs-RGPs_PC00004 - TFs-RGPs_PD03576
	180	b2570	rseC	T	regulator of sigma E (sigma 24) factor
	180	b2571	rseB	T	periplasmic negative regulator of sigmaE
	180	b2572	rseA	T	anti sigma E (sigma 24) factor, negative regulator
	180	b2573	rpoE	K	RNA polymerase sigma-70 factor	PCs_RNAPE-CPLX
	181	b3368	cysG	H	siroheme synthase, catalyses four reactions between uroporphyrinogen III and siroheme	PWYS_HEMESYN2-PWY - TFs-RGPs_NARL-MONOMER - TFs-RGPs_PC00027 - TFs-RGPs_PD00196 - TFs-RGPs_PD00197 - TFs-RGPs_PD00288 - TFs-RGPs_PD00521
	181	b3365	nirB	C	nitrite reductase (NAD(P)H) subunit	PCs_NITRITREDUCT-CPLX - TFs-RGPs_NARL-MONOMER - TFs-RGPs_PC00027 - TFs-RGPs_PD00196 - TFs-RGPs_PD00197 - TFs-RGPs_PD00288 - TFs-RGPs_PD00521
	181	b3366	nirD	P	nitrite reductase small subunit	PCs_NITRITREDUCT-CPLX - TFs-RGPs_NARL-MONOMER - TFs-RGPs_PC00027 - TFs-RGPs_PD00196 - TFs-RGPs_PD00197 - TFs-RGPs_PD00288 - TFs-RGPs_PD00521
	181	b3367	nirC	-	nitrite reductase activity	TFs-RGPs_NARL-MONOMER - TFs-RGPs_PC00027 - TFs-RGPs_PD00196 - TFs-RGPs_PD00197 - TFs-RGPs_PD00288 - TFs-RGPs_PD00521
	182	b2901	bglA	G	6-phospho-beta-glucosidase A
	182	b3721	bglB	G	phospho-beta-glucosidase B; cryptic	TFs-RGPs_PC00004 - TFs-RGPs_PD00196 - TFs-RGPs_PD00288
	182	b3722	bglF	G	PTS family enzyme IIBC (N-terminal); enzyme IIA (C-terminal), beta-glucoside-specific, cryptic	PCs_CPLX-154 - TFs-RGPs_PC00004 - TFs-RGPs_PD00196 - TFs-RGPs_PD00288
	182	b3723	bglG	K	positive regulation of bgl operon	TFs-RGPs_PC00004 - TFs-RGPs_PD00196 - TFs-RGPs_PD00288
	183	b2917	sbm	I	methylmalonyl-CoA mutase	PWYS_PROPIONMET-PWY - PWYS_PWY0-43
	183	b2918	argK	E	arginine/ornithine transport system ATPase
	183	b3091	uxaA	G	altronate hydrolase	PWYS_GALACTUROCAT-PWY - TFs-RGPs_PD03270
	183	b3689	yidR	-	hypothetical protein
	184	b2961	mutY	L	adenine DNA glycosylase
	184	b2962	yggX	CO	hypothetical protein
	184	b2963	mltC	M	lytic murein transglycosylase C, membrane-bound
	184	b2964	nupG	GEP	nucleoside transport protein (MFS family)	TFs-RGPs_PC00004 - TFs-RGPs_PD01196 - TFs-RGPs_PD04028
	185	b3784	rfe	M	UDP-GlcNAc:undecaprenylphosphate GlcNAc-1-phosphate transferase	PWYS_ECASYN-PWY
	185	b3793	wecF	-	putative enterobacterial common antigen polymerase	PWYS_ECASYN-PWY
	185	b3794	wecG	M	putative UDP-N-acetyl-D-mannosaminuronic acid transferase	PWYS_ECASYN-PWY
	185	b3791	wecE	M	TDP-4-oxo-6-deoxy-D-glucose transaminase	PWYS_ECASYN-PWY
	186	b4384	deoD	F	purine nucleoside phosphorylase	PWYS_SALVADEHYPOX-PWY - PWYS_SALVPURINE2-PWY - TFs-RGPs_PC00004 - TFs-RGPs_PD00196 - TFs-RGPs_PD01196 - TFs-RGPs_PD04028
	186	b4381	deoC	F	deoxyribose-phosphate aldolase	PWYS_DRIBOPMET-PWY - TFs-RGPs_PC00004 - TFs-RGPs_PD00196 - TFs-RGPs_PD01196 - TFs-RGPs_PD04028
	186	b4382	deoA	F	thymidine phosphorylase	PWYS_DRIBOPMET-PWY - PWYS_PWY0-181 - TFs-RGPs_PC00004 - TFs-RGPs_PD00196 - TFs-RGPs_PD01196 - TFs-RGPs_PD04028
	186	b4383	deoB	G	phosphopentomutase	PWYS_DRIBOPMET-PWY - PWYS_PWY0-661 - TFs-RGPs_PC00004 - TFs-RGPs_PD00196 - TFs-RGPs_PD01196 - TFs-RGPs_PD04028
	187	b4092	phnP	R	phosphonate metabolism	TFs-RGPs_PHOB-MONOMER
	187	b4093	phnO	K	conserved protein in phn operon, acyltransferase domain	TFs-RGPs_PHOB-MONOMER
	187	b4094	phnN	P	ATP-binding component of phosphonate transport	PWYS_PWY0-661 - TFs-RGPs_PHOB-MONOMER
	187	b4102	phnF	K	putative transcriptional regulator	TFs-RGPs_PHOB-MONOMER
	188	b0243	proA	E	gamma-glutamyl phosphate reductase	PCs_PROLINEMULTI-CPLX - PWYS_PROSYN-PWY
	188	b0238	gpt	F	xanthine phosphoribosyltransferase	PWYS_SALVADEHYPOX-PWY - PWYS_SALVPURINE2-PWY
	188	b0242	proB	E	gamma-glutamyl kinase	PCs_PROLINEMULTI-CPLX - PWYS_PROSYN-PWY
	189	b0031	dapB	E	dihydrodipicolinate reductase	PWYS_DAPLYSINESYN-PWY
	189	b2478	dapA	EM	dihydrodipicolinate synthase	PWYS_DAPLYSINESYN-PWY
	189	b2472	dapE	E	succinyl-diaminopimelate desuccinylase	PWYS_DAPLYSINESYN-PWY
	190	b0882	clpA	O	ATP-binding component of serine protease	PCs_CPLX0-3104 - PCs_CPLX0-3108
	190	b0881	clpS	S	ATP-dependent Clp protease adaptor protein ClpS
	190	b0885	aat	O	leucyl/phenylalanyl-tRNA--protein transferase
	191	b2942	metK	H	S-adenosylmethionine synthetase	PWYS_SAM-PWY - TFs-RGPs_PD04032
	191	b2945	endA	L	DNA-specific endonuclease I
	191	b2947	gshB	HJ	glutathione synthetase	PWYS_GLUTATHIONESYN-PWY
	192	b3168	infB	J	translation initiation factor IF-2	TFs-RGPs_PC00004 - TFs-RGPs_PC00005 - TFs-RGPs_PD00196
	192	b3163	nlpI	R	NlpI lipoprotein believed to be involved in cell division
	192	b3167	rbfA	J	ribosome-binding factor A	TFs-RGPs_PC00004 - TFs-RGPs_PC00005 - TFs-RGPs_PD00196
	193	b3321	rpsJ	J	30S ribosomal protein S10
	193	b1248	yciU	S	hypothetical protein
	193	b3322	pioO	-	calcium-binding protein required for initiation of chromosome replication
	194	b3783	rho	JK	transcription termination factor Rho
	194	b3910	yiiM	S	hypothetical protein
	194	b4335	yjiM	E	putative 2-hydroxyglutaryl-CoA dehydratase
	195	b0026	ileS	J	isoleucyl-tRNA synthetase	PWYS_TRNA-CHARGING-PWY
	195	b0027	lspA	MU	signal peptidase II
	195	b0168	map	J	methionine aminopeptidase
	196	b2515	ispG	I	4-hydroxy-3-methylbut-2-en-1-yl diphosphate synthase	PWYS_NONMEVIPP-PWY
	196	b0173	ispC	I	1-deoxy-D-xylulose 5-phosphate reductoisomerase	PWYS_NONMEVIPP-PWY
	196	b2514	hisS	J	histidyl-tRNA synthetase	PWYS_TRNA-CHARGING-PWY
	197	b0030	rihC	F	nucleoside hydrolase
	197	b0651	rihA	F	pyrimidine specific nucleoside hydrolase
	197	b2162	rihB	F	pyrimidine specific nucleoside hydrolase
	198	b0032	carA	EF	carbamoyl-phosphate synthase small subunit	PCs_CARBPSYN-CPLX - PWYS_ARGSYN-PWY - PWYS_PWY0-162 - TFs-RGPs_PC00005 - TFs-RGPs_PC00027
	198	b0033	carB	EF	carbamoyl-phosphate synthase large subunit	PCs_CARBPSYN-CPLX - PWYS_ARGSYN-PWY - PWYS_PWY0-162 - TFs-RGPs_PC00005 - TFs-RGPs_PC00027
	198	b4245	pyrB	F	aspartate carbamoyltransferase catalytic subunit	PCs_ASPCARBTRANS-CPLX - PWYS_PWY0-162
	199	b0039	caiA	I	crotonobetainyl-CoA dehydrogenase	PWYS_CARNMET-PWY - TFs-RGPs_ARCA-MONOMER - TFs-RGPs_G6088-MONOMER - TFs-RGPs_PC00004 - TFs-RGPs_PC00027
	199	b3846	fadB	I	4-enzyme protein: 3-hydroxyacyl-CoA dehydrogenase; 3-hydroxybutyryl-CoA epimerase; delta(3)-cis-delta(2)-trans-enoyl-CoA isomerase; enoyl-CoA hydratase	PCs_FAO-CPLX - PWYS_FAO-PWY - TFs-RGPs_ARCA-MONOMER - TFs-RGPs_PD01520
	199	b0221	fadE	I	acyl-CoA dehydrogenase	PWYS_FAO-PWY
	200	b1393	paaF	I	probable enoyl-CoA hydratase	PWYS_PWY0-321 - TFs-RGPs_G6720-MONOMER - TFs-RGPs_PC00004 - TFs-RGPs_PC00027
	200	b1394	paaG	I	enoyl-CoA hydratase	PWYS_PWY0-321 - TFs-RGPs_G6720-MONOMER - TFs-RGPs_PC00004 - TFs-RGPs_PC00027
	200	b1395	paaH	I	3-hydroxybutyryl-CoA dehydrogenase	PWYS_PWY0-321 - TFs-RGPs_G6720-MONOMER - TFs-RGPs_PC00004 - TFs-RGPs_PC00027
	201	b0053	surA	O	peptidyl-prolyl cis-trans isomerase (PPIase), involved in maturation of outer membrane proteins
	201	b2893	dsbC	O	protein disulfide isomerase II	TFs-RGPs_CPXR-MONOMER
	201	b4136	dsbD	OC	thiol:disulfide interchange protein precursor
	202	b0269	yagF	EG	hypothetical protein
	202	b4297	yjhG	EG	hypothetical protein
	202	b2373	yfdU	EH	hypothetical protein
	203	b0871	poxB	EH	pyruvate dehydrogenase	PWYS_FERMENTATION-PWY - TFs-RGPs_PD00365 - TFs-RGPs_PD00406
	203	b3671	ilvB	EH	acetolactate synthase large subunit	PCs_ACETOLACTSYNI-CPLX - PWYS_ILEUSYN-PWY - PWYS_VALSYN-PWY - TFs-RGPs_PC00004
	203	b3670	ilvN	E	acetolactate synthase small subunit	PCs_ACETOLACTSYNI-CPLX - PWYS_ILEUSYN-PWY - PWYS_VALSYN-PWY - TFs-RGPs_PC00004
	204	b0345	lacI	K	transcriptional repressor of lactose catabolism (GalR/LacI family)	TFs-RGPs_PD00763
	204	b1658	purR	K	transcriptional repressor for de novo purine nucleotide synthesis (GalR/LacI family)	TFs-RGPs_PC00033
	204	b1620	malI	K	maltose regulon regulatory protein	TFs-RGPs_PC00004 - TFs-RGPs_PD00361
	205	b0094	ftsA	D	cell division protein	TFs-RGPs_PC00084 - TFs-RGPs_PD02198
	205	b0095	ftsZ	D	cell division protein FtsZ	TFs-RGPs_PC00084 - TFs-RGPs_PD02198
	205	b2412	zipA	D	cell division protein ZipA
	206	b3396	mrcA	M	bifunctional penicillin-binding protein 1a: transglycosylase (N-terminal); transpeptidase (C-terminal)
	206	b3397	yrfE	L	conserved protein, MutT-like
	206	b3398	yrfF	-	putative dehydrogenase
	207	b0381	ddl	M	D-alanylalanine synthetase	PWYS_PEPTIDOGLYCANSYN-PWY
	207	b0469	apt	F	adenine phosphoribosyltransferase	PWYS_SALVADEHYPOX-PWY
	207	b2784	relA	TK	(p)ppGpp synthetase I (GTP pyrophosphokinase)	PWYS_PPGPPMET-PWY
	208	b3983	rplK	J	50S ribosomal protein L11
	208	b3258	panF	H	sodium/panthothenate symporter
	208	b3259	prmA	J	ribosomal protein L11 methyltransferase
	209	b0958	sulA	D	suppressor of lon; inhibitor of cell division and FtsZ ring formation upon DNA damage/inhibition	TFs-RGPs_PC00010
	209	b0957	ompA	M	outer membrane protein 3a (II*;G;d)	TFs-RGPs_PC00004
	209	b2032	wbbK	M	putative glucose transferase
	210	b0181	lpxA	M	UDP-N-acetylglucosamine acyltransferase	PWYS_NAGLIPASYN-PWY
	210	b0182	lpxB	M	lipid-A-disaccharide synthase	PWYS_NAGLIPASYN-PWY
	210	b0183	rnhB	L	ribonuclease HII
	211	b0106	hofC	NU	component in type IV pilin biogenesis, transmembrane protein
	211	b0107	hofB	NU	putative integral membrane protein involved in biogenesis of fimbriae (type IV pilin), protein transport, DNA uptake
	211	b0108	ppdD	NU	prelipin peptidase dependent protein
	212	b0112	aroP	E	aromatic amino acid transport protein	TFs-RGPs_PD00413
	212	b2156	lysP	E	lysine-specific permease
	212	b2157	yeiE	K	putative transcriptional regulator (LysR familiy)
	213	b2255	yfbG	JMG	hypothetical protein
	213	b0945	pyrD	F	dihydroorotate dehydrogenase	PWYS_PWY0-162 - TFs-RGPs_PC00033
	213	b0949	uup	R	putative ATP-binding component of a transport system
	214	b0124	gcd	G	glucose dehydrogenase	PWYS_GLUCOSE1PMETAB-PWY - TFs-RGPs_PC00004 - TFs-RGPs_PC00027
	214	b0125	hpt	F	hypoxanthine-guanine phosphoribosyltransferase	PWYS_SALVPURINE2-PWY - TFs-RGPs_PC00004 - TFs-RGPs_PC00027
	214	b0188	tilS	D	tRNA(Ile)-lysidine synthetase
	215	b0161	degP	O	periplasmic serine protease Do, heat shock protein	TFs-RGPs_CPXR-MONOMER
	215	b3234	degQ	O	serine endoprotease
	215	b3235	degS	O	periplasmic serine endoprotease
	216	b0197	metQ	P	D-methionine transport protein (ABC superfamily, peri_bind)	PCs_METNIQ-METHIONINE-ABC-CPLX - TFs-RGPs_PD04032
	216	b0198	metI	P	D- and L-methionine transport protein (ABC superfamily, membrane)	PCs_METNIQ-METHIONINE-ABC-CPLX - TFs-RGPs_PD04032
	216	b0199	metN	P	D- and L-methionine transport protein (ABC superfamily, atp_bind)	PCs_METNIQ-METHIONINE-ABC-CPLX - TFs-RGPs_PD04032
	217	b0200	gmhB	E	hypothetical protein
	217	b0222	lpcA	G	phosphoheptose isomerase
	217	b3149	yraO	G	putative phosphoheptose isomerase
	218	b0211	mltD	M	lytic murein transglycosylase C, membrane-bound
	218	b1322	ycjF	S	hypothetical protein
	218	b1695	ydiO	I	crotonobetainyl-CoA dehydrogenase	PWYS_FAO-PWY
	219	b0239	yafA	R	hypothetical protein
	219	b0195	yaeB	S	hypothetical protein
	219	b0240	crl	-	transcriptional regulator of cryptic csgA gene for curli surface fibers
	220	b0311	betA	E	choline dehydrogenase	PWYS_BETSYN-PWY - TFs-RGPs_ARCA-MONOMER - TFs-RGPs_PD00251
	220	b0312	betB	C	NAD+-dependent betaine aldehyde dehydrogenase	PWYS_BETSYN-PWY - TFs-RGPs_ARCA-MONOMER - TFs-RGPs_PD00251
	220	b0313	betI	K	transcriptional regulator BetI	TFs-RGPs_ARCA-MONOMER - TFs-RGPs_PD00251
	221	b0335	prpE	I	putative acetyl-CoA synthetase of the propionate catabolism operon
	221	b4069	acs	I	acetyl-coenzyme A synthetase	PWYS_ACETATEUTIL-PWY - PWYS_PWY0-42 - TFs-RGPs_PC00004 - TFs-RGPs_PC00027 - TFs-RGPs_PD00196
	221	b4067	actP	R	acetate permease	TFs-RGPs_PC00004 - TFs-RGPs_PC00027 - TFs-RGPs_PD00196
	222	b0339	cynT	P	carbonic anhydrase	PWYS_CYANCAT-PWY - TFs-RGPs_PD00291
	222	b0340	cynS	P	cyanate hydratase	PWYS_CYANCAT-PWY - TFs-RGPs_PD00291
	222	b0341	cynX	P	cyanate transport	TFs-RGPs_PD00291
	223	b3076	ebgA	G	beta-D-galactosidase, ebg operon, alpha subunit, cryptic gene	TFs-RGPs_PC00004 - TFs-RGPs_PD03254
	223	b3075	ebgR	K	regulator of ebg operon	TFs-RGPs_PD03254
	223	b3077	ebgC	G	beta-D-galactosidase, ebg operon, beta subunit, cryptic gene	TFs-RGPs_PC00004 - TFs-RGPs_PD03254
	224	b4241	treR	K	trehalose repressor	TFs-RGPs_EG12202-MONOMER - TFs-RGPs_PHOP-MONOMER
	224	b4239	treC	G	trehalase 6-P hydrolase	PWYS_TREDEGLOW-PWY - TFs-RGPs_ARCA-MONOMER - TFs-RGPs_EG12202-MONOMER - TFs-RGPs_PC00004
	224	b4240	treB	G	PTS family enzyme IIBC, trehalose(maltose)-specific	PCs_CPLX-168 - PWYS_TREDEGLOW-PWY - TFs-RGPs_ARCA-MONOMER - TFs-RGPs_EG12202-MONOMER - TFs-RGPs_PC00004
	225	b0383	phoA	P	alkaline phosphatase	TFs-RGPs_PHOB-MONOMER
	225	b0384	psiF	-	induced by phosphate starvation	TFs-RGPs_PHOB-MONOMER
	225	b0688	pgm	G	phosphoglucomutase	PWYS_GLUCOSE1PMETAB-PWY - PWYS_GLYCOCAT-PWY
	226	b1130	phoP	TK	response regulator in two-component regulatory system with PhoQ, regulates gene expression at low [Mg+] (OmpR family)	PWYS_PHOQ-PWY - TFs-RGPs_PHOP-MONOMER
	226	b1129	phoQ	T	sensor protein PhoQ	PWYS_PHOQ-PWY - TFs-RGPs_PHOP-MONOMER
	226	b3961	oxyR	K	activator, hydrogen peroxide-inducible genes	TFs-RGPs_PC00004 - TFs-RGPs_PD00214
	227	b0421	ispA	H	geranyltranstransferase (=farnesyldiphosphate synthase)	PWYS_POLYISOPRENSYN-PWY
	227	b4041	plsB	I	glycerol-3-phosphate acyltransferase	PWYS_PHOSLIPSYN-PWY
	227	b4044	dinF	V	DNA-damage-inducible protein F	TFs-RGPs_PC00010
	228	b0433	ampG	GEP	muropeptide transport protein (MFS family)
	228	b0435	bolA	T	possible regulator of murein genes	TFs-RGPs_PC00029 - TFs-RGPs_PD00288
	228	b1654	ydhD	O	hypothetical protein
	229	b3931	hslU	O	ATP-dependent protease ATP-binding subunit	PCs_CPLX0-1163
	229	b3811	xerC	L	tyrosine recombinase
	229	b3932	hslV	O	ATP-dependent protease peptidase subunit	PCs_CPLX0-1163
	230	b1237	hns	R	DNA-binding protein HLP-II (HU, BH2, HD, NS); pleiotropic regulator	TFs-RGPs_EG12243-MONOMER - TFs-RGPs_PD00196 - TFs-RGPs_PD00288 - TFs-RGPs_PD03695
	230	b2669	stpA	R	DNA-bending protein with chaperone activity	TFs-RGPs_PD00288 - TFs-RGPs_PD00353
	230	b1625	ydgT	-	hypothetical protein
	231	b0447	ybaO	K	putative LRP-like transcriptional regulator
	231	b0448	mdlA	V	ATP-binding component of a transport system
	231	b0449	mdlB	V	putative ATP-binding component of a transport system
	232	b0450	glnK	E	nitrogen regulatory protein P-II 2	PWYS_NRI-PWY - TFs-RGPs_EG12243-MONOMER - TFs-RGPs_GLNG-CPLX
	232	b0451	amtB	P	probable ammonium transporter	TFs-RGPs_EG12243-MONOMER - TFs-RGPs_GLNG-CPLX
	232	b2553	glnB	E	regulatory protein (P-II) for nitrogen assimilation by glutamine synthetase (ATase)	TFs-RGPs_PC00033
	233	b3869	glnL	T	histidine protein kinase sensor for GlnG regulator (nitrogen regulator II, NRII)	PWYS_NRI-PWY - TFs-RGPs_GLNG-CPLX - TFs-RGPs_PC00004
	233	b3868	glnG	T	response regulator for gln (sensor glnL) (nitrogen regulator I, NRI)	PWYS_NRI-PWY - TFs-RGPs_GLNG-CPLX - TFs-RGPs_PC00004
	233	b3870	glnA	E	glutamine synthetase	PWYS_AMMASSIM-PWY - PWYS_GLNSYN-PWY - PWYS_NRI-PWY - TFs-RGPs_GLNG-CPLX - TFs-RGPs_PC00004
	234	b2074	yegM	M	membrane protein inolved in drug resistance	PCs_TRANS-CPLX-202
	234	b0575	cusA	P	outer membrane copper (silver) and drug transport protein (RND family)	PCs_CPLX0-1721 - TFs-RGPs_G6319-MONOMER
	234	b3514	yhiV	V	multidrug transport protein, RpoS-dependent (RND family)	PCs_TRANS-CPLX-204
	235	b2470	acrD	V	aminoglycoside efflux pump
	235	b3266	acrF	V	integral transmembrane protein; acridine resistance	PCs_CPLX0-2141
	235	b3513	yhiU	M	multidrug resistance protein (lipoprotein)	PCs_TRANS-CPLX-204
	236	b1913	uvrC	L	excinuclease ABC subunit C	PCs_UVRABC-CPLX
	236	b1912	pgsA	I	phosphatidylglycerophosphate synthetase (CDP-1,2-diacyl-sn-glycero-3-phosphate phosphatidyl transferase)	PWYS_PHOSLIPSYN-PWY
	236	b1914	uvrY	TK	response regulator	PWYS_PWY0-21
	237	b3652	recG	LK	DNA helicase, ATP-dependent resolution of Holliday junctions, branch migration
	237	b3648	gmk	F	guanylate kinase	PWYS_DENOVOPURINE2-PWY
	237	b3653	gltS	E	glutamate transport
	238	b0476	aes	I	acetyl esterase
	238	b4119	melA	G	alpha-galactosidase	TFs-RGPs_PC00004 - TFs-RGPs_PD00208
	238	b4120	melB	G	melibiose permease II	TFs-RGPs_PC00004 - TFs-RGPs_PD00208
	239	b0485	ybaS	E	glutaminase	PWYS_GLUTAMINDEG-PWY - TFs-RGPs_EG12243-MONOMER
	239	b0960	yccS	S	putative efflux transport protein (PET family)
	239	b1933	--
	240	b3600	mtlD	G	mannitol-1-phosphate 5-dehydrogenase	PWYS_MANNIDEG-PWY - TFs-RGPs_PC00004 - TFs-RGPs_PC00061 - TFs-RGPs_PD00196 - TFs-RGPs_PD00369
	240	b3599	mtlA	G	PTS family enzyme IICB (N-terminal); enzyme IIA (C-terminal), mannitol-specific	PCs_CPLX-166 - TFs-RGPs_PC00004 - TFs-RGPs_PC00061 - TFs-RGPs_PD00196 - TFs-RGPs_PD00369
	240	b3601	mtlR	K	repressor for mtl	TFs-RGPs_PC00004 - TFs-RGPs_PC00061 - TFs-RGPs_PD00196 - TFs-RGPs_PD00369
	241	b0515	ylbA	R	hypothetical protein
	241	b0516	allC	E	N-carbamoyl-L-amino acid amidohydrolase	PWYS_PWY0-41
	241	b0517	allD	C	ureidoglycolate dehydrogenase	PWYS_PWY0-41
	242	b2220	atoC	T	response regulator in two-component regulatory system with AtoS, regulates acetoacetate metabolism (EBP family)	PWYS_ATO-PWY - TFs-RGPs_ATOC-MONOMER
	242	b2221	atoD	I	acetyl-CoA:acetoacetyl-CoA transferase alpha subunit	PCs_ACETOACETYL-COA-TRANSFER-CPLX - PWYS_ACETOACETATE-DEG-PWY - TFs-RGPs_ATOC-MONOMER
	242	b2222	atoA	I	acetyl-CoA:acetoacetyl-CoA transferase beta subunit	PCs_ACETOACETYL-COA-TRANSFER-CPLX - PWYS_ACETOACETATE-DEG-PWY - TFs-RGPs_ATOC-MONOMER
	243	b0572	cusC	MU	outer membrane transport protein involved in copper (silver) tolerance	PCs_CPLX0-1721 - TFs-RGPs_G6319-MONOMER
	243	b0573	ylcC	S	putative periplasmic copper-binding protein	PCs_CPLX0-1721 - TFs-RGPs_G6319-MONOMER
	243	b0574	cusB	M	outer membrane transport protein involved in copper (silver) tolerance	PCs_CPLX0-1721 - TFs-RGPs_G6319-MONOMER
	244	b0583	entD	Q	enterochelin synthetase, component D	PCs_ENTMULTI-CPLX - PWYS_ENTBACSYN-PWY - TFs-RGPs_PC00009
	244	b0584	fepA	P	outer membrane porin, receptor for ferric enterobactin and colicins B and D	PCs_CPLX0-1941 - PCs_CPLX0-1944 - TFs-RGPs_PC00009
	244	b0585	fes	P	enterochelin esterase	TFs-RGPs_PC00009
	245	b0604	dsbG	O	disulfide isomerase, thiol-disulphide oxidase, periplasmic
	245	b0605	ahpC	O	alkyl hydroperoxide reductase, C22 subunit, thioredoxin-like, detoxification of hydroperoxides	PCs_CPLX0-245 - TFs-RGPs_PD00214 - TFs-RGPs_PD04032
	245	b0606	ahpF	O	alkyl hydroperoxide reductase subunit, FAD/NAD(P)-binding, detoxification of hydroperoxides	PCs_CPLX0-245 - TFs-RGPs_PD00214 - TFs-RGPs_PD04032
	246	b3213	gltD	E	glutamate synthase, small subunit	PCs_GLUTAMATESYN-CPLX - PCs_GLUTAMATESYN-DIMER - PWYS_AMMASSIM-PWY - PWYS_GLUTSYN-PWY - TFs-RGPs_EG11544-MONOMER - TFs-RGPs_G7072-MONOMER - TFs-RGPs_PD00353
	246	b3212	gltB	E	glutamate synthase, large subunit	PCs_GLUTAMATESYN-CPLX - PCs_GLUTAMATESYN-DIMER - PWYS_AMMASSIM-PWY - PWYS_GLUTSYN-PWY - TFs-RGPs_EG11544-MONOMER - TFs-RGPs_G7072-MONOMER - TFs-RGPs_PD00353
	246	b3214	gltF	-	regulator of gltBDF operon, induction of Ntr enzyme	TFs-RGPs_EG11544-MONOMER - TFs-RGPs_G7072-MONOMER - TFs-RGPs_PD00353
	247	b3019	parC	L	DNA topoisomerase IV subunit A	PCs_CPLX0-2424
	247	b3017	sufI	Q	suppressor of ftsI
	247	b3018	plsC	I	1-acyl-sn-glycerol-3-phosphate acyltransferase	PWYS_PHOSLIPSYN-PWY
	248	b4117	adiA	E	arginine decarboxylase; inducible by acid, catabolic	PWYS_PWY0-823 - TFs-RGPs_EG11966-MONOMER - TFs-RGPs_PC00027 - TFs-RGPs_PD00288
	248	b2068	alkA	L	3-methyl-adenine DNA glycosylase II, inducible	TFs-RGPs_PD00230
	248	b2213	ada	LF	O6-methylguanine-DNA methyltransferase; transcription activator/repressor	TFs-RGPs_PD00230
	249	b0711	ybgJ	E	putative carboxylase
	249	b0713	ybgL	R	hypothetical protein
	249	b0712	ybgK	E	putative carboxylase
	250	b0929	ompF	M	outer membrane pore protein 1a (Ia;b;F)	PCs_CPLX0-2221 - TFs-RGPs_PC00027 - TFs-RGPs_PC00029 - TFs-RGPs_PD00353 - TFs-RGPs_PD00969
	250	b0928	aspC	E	aspartate aminotransferase	PWYS_ASPARTATESYN-PWY - PWYS_GLUTDEG-PWY
	250	b0930	asnS	J	asparaginyl-tRNA synthetase	PWYS_TRNA-CHARGING-PWY
	251	b3485	yhhJ	V	putative transporter	PCs_ABC-50-CPLX
	251	b0792	ybhR	V	putative transport protein (ABC superfamily, membrane)	PCs_ABC-57-CPLX
	251	b0793	ybhS	V	putative transport protein (ABC superfamily, membrane)	PCs_ABC-57-CPLX
	252	b3708	tnaA	E	tryptophan deaminase, PLP-dependent	PWYS_LCYSDEG-PWY - PWYS_TRYPDEG-PWY - TFs-RGPs_PC00004 - TFs-RGPs_TORR-CPLX
	252	b3707	tnaL	-	tryptophanase leader peptide	TFs-RGPs_PC00004 - TFs-RGPs_TORR-CPLX
	252	b3709	tnaB	LE	low affinity tryptophan permease	TFs-RGPs_PC00004 - TFs-RGPs_TORR-CPLX
	253	b1290	sapF	V	peptide transport protein (ABC superfamily, atp_bind)	PCs_ABC-29-CPLX
	253	b1291	sapD	V	peptide transport protein (ABC superfamily, atp_bind)	PCs_ABC-29-CPLX
	253	b1294	sapA	E	homolog of Salmonella peptide transport periplasmic protein	PCs_ABC-29-CPLX
	254	b0842	cmr	GEP	multidrug/chloramphenicol efflux transport protein (MFS family)
	254	b3710	yidY	GEP	drug/chloramphenicol transport protein (MFS family)
	254	b4337	yjiO	GEP	multidrug transport protein (MFS family)
	255	b0888	trxB	O	thioredoxin reductase	PWYS_THIOREDOX-PWY
	255	b0889	lrp	K	regulator for leucine (or lrp) regulon and high-affinity branched-chain amino acid transport system	TFs-RGPs_EG11544-MONOMER - TFs-RGPs_PD00353
	255	b2480	bcp	O	bacterioferritin comigratory protein
	256	b1062	pyrC	F	dihydroorotase	PWYS_PWY0-162 - TFs-RGPs_PC00033
	256	b1059	solA	E	N-methyltryptophan oxidase, FAD-binding
	256	b1064	grxB	O	glutaredoxin 2
	257	b0937	ssuE	R	NAD(P)H-dependent FMN reductase	PWYS_ALKANEMONOX-PWY
	257	b1198	dhaM	GS	PTS hybrid protein	PCs_CPLX0-2081
	257	b2463	maeB	C	phosphate acetyltransferase	PWYS_GLUCONEO-PWY
	258	b2203	napB	C	cytochrome c-type protein	PCs_CPLX0-3243 - PCs_NAP-CPLX - PCs_NAPAB-CPLX - PWYS_ANARESPACC-PWY - TFs-RGPs_MONOMER0-185 - TFs-RGPs_NARL-MONOMER - TFs-RGPs_NARP-MONOMER - TFs-RGPs_PD00197
	258	b2206	napA	C	periplasmic nitrate reductase, large subunit, in complex with NapB	PCs_CPLX0-3243 - PCs_NAP-CPLX - PCs_NAPAB-CPLX - PWYS_ANARESPACC-PWY - TFs-RGPs_MONOMER0-185 - TFs-RGPs_NARL-MONOMER - TFs-RGPs_NARP-MONOMER - TFs-RGPs_PD00197
	258	b2207	napD	P	periplasmic nitrate reductase assembly protein	TFs-RGPs_MONOMER0-185 - TFs-RGPs_NARL-MONOMER - TFs-RGPs_NARP-MONOMER - TFs-RGPs_PD00197
	259	b2434	ypeA	R	putative acetyltransferase
	259	b2300	yfcE	R	phosphodiesterase
	259	b2431	yfeX	P	hypothetical protein
	260	b1040	csgD	K	putative 2-component transcriptional regulator for 2nd curli operon	TFs-RGPs_CPXR-MONOMER - TFs-RGPs_PC00029 - TFs-RGPs_PD01379
	260	b1041	csgB	-	minor curlin subunit precursor, nucleator for assembly of adhesive surface organelles	TFs-RGPs_CPXR-MONOMER - TFs-RGPs_PD01379
	260	b1042	csgA	-	curlin major subunit, coiled surface structures, cryptic	TFs-RGPs_CPXR-MONOMER - TFs-RGPs_PD01379
	261	b1045	ymdB	R	hypothetical protein
	261	b2567	rncS	K	ribonuclease III
	261	b1286	rnb	K	exoribonuclease II
	262	b1054	htrB	M	lipid A biosynthesis lauroyl acyltransferase
	262	b1855	msbB	M	lipid A biosynthesis lauroyl acyltransferase
	262	b2378	ddg	M	lipid A biosynthesis lauroyl acyltransferase
	263	b1134	ymfB	L	putative Nudix hydrolase
	263	b3878	yihQ	G	putative alpha-xylosidase
	263	b3656	yicI	G	putative alpha-xylosidase
	264	b1188	ycgB	S	putative sporulation protein
	264	b1783	yeaG	T	hypothetical protein	TFs-RGPs_GLNG-CPLX
	264	b1784	yeaH	S	hypothetical protein	TFs-RGPs_GLNG-CPLX
	265	b1211	prfA	J	peptide chain release factor 1
	265	b1212	hemK	J	N5-glutamine S-adenosyl-L-methionine-dependent methyltransferase
	265	b1238	tdk	F	thymidine kinase	PWYS_PWY0-181
	266	b3202	rpoN	K	DNA-directed RNA polymerase subunit N	PCs_RNAP54-CPLX
	266	b2709	ygaA	KT	anaerobic nitric oxide reductase transcription regulator	TFs-RGPs_EG12108-MONOMER
	266	b3204	ptsN	GT	PTS family enzyme IIA, sugar-specific, regulates N metabolism
	267	b3452	ugpA	G	sn-glycerol 3-phosphate transport protein (ABC superfamily, membrane)	PCs_ABC-34-CPLX - TFs-RGPs_PC00004 - TFs-RGPs_PHOB-MONOMER
	267	b3450	ugpC	G	ATP-binding component of sn-glycerol 3-phosphate transport system	PCs_ABC-34-CPLX - TFs-RGPs_PC00004 - TFs-RGPs_PHOB-MONOMER
	267	b3453	ugpB	G	sn-glycerol 3-phosphate transport protein (ABC superfamily, peri_bind)	PCs_ABC-34-CPLX - TFs-RGPs_PC00004 - TFs-RGPs_PHOB-MONOMER
	268	b1336	abgT	H	aminobenzoyl-glutamate transport protein
	268	b1337	abgB	R	aminobenzoyl-glutamate utilization protein
	268	b1338	abgA	R	aminobenzoyl-glutamate utilization protein
	269	b1341	ydaM	T	hypothetical protein
	269	b1455	yncH	-	unknown CDS
	269	b1491	yddW	S	conserved protein, glycosyltransferase domain
	270	b1363	trkG	P	Rac prophage; Trk system potassium uptake
	270	b3290	trkA	P	potassium transporter peripheral membrane component
	270	b3849	trkH	P	potassium transport protein, requires TrkE (Trk family)
	271	b1376	ynaF	T	conserved hypothetical protein, adenine nucleotide-binding domain
	271	b2137	yohF	IQ	oxidoreductase
	271	b4389	sms	O	probable ATP-dependent protease
	272	b1474	fdnG	C	formate dehydrogenase-N, alpha subunit, nitrate-inducible	PCs_ALPHA-SUBUNIT-CPLX - PCs_FORMATEDEHYDROGN-CPLX - PWYS_ANARESPDON-PWY - TFs-RGPs_NARL-MONOMER - TFs-RGPs_PD00197
	272	b3891	fdhE	O	formate dehydrogenase accessory protein FdhE
	272	b1475	fdnH	C	formate dehydrogenase-N, Fe-S beta subunit, nitrate-inducible	PCs_ALPHA-SUBUNIT-CPLX - PCs_FORMATEDEHYDROGN-CPLX - PWYS_ANARESPDON-PWY - TFs-RGPs_NARL-MONOMER - TFs-RGPs_PD00197
	273	b1525	yneI	C	putative aldehyde dehydrogenase
	273	b0692	potE	E	putrescine transport protein
	273	b1802	yeaW	P	putative di(mono)oxygenase, alpha subunit
	274	b3209	yhbL	Q	sigma cross-reacting protein 27A (SCRP-27A)
	274	b3414	yhgI	SO	membrane-bound protein in GNT I transport system	TFs-RGPs_PC00004 - TFs-RGPs_PD03585
	274	b3413	yhgH	R	putative periplasmic gluconate-binding protein in GNT I transport system	TFs-RGPs_PC00004 - TFs-RGPs_PD03585
	275	b1563	relE	JD	Qin prophage; part of two-component toxin-antitoxin system with RelB, transcriptional corepressor of relBE operon
	275	b1564	relB	L	Qin prophage; part of two-component toxin-antitoxin system with RelE, transcriptional repressor of relBE operon
	275	b3778	rep	L	Rep helicase, a single-stranded DNA-dependent ATPase
	276	b1611	fumC	C	fumarate hydratase	PWYS_ANARESP1-PWY - PWYS_FERMENTATION-PWY - PWYS_TCA - TFs-RGPs_ARCA-MONOMER - TFs-RGPs_PD00365 - TFs-RGPs_PD00406 - TFs-RGPs_PD04418
	276	b1612	fumA	C	fumarase A (fumarate hydratase class I), aerobic isozyme	PWYS_ANARESP1-PWY - PWYS_FERMENTATION-PWY - PWYS_TCA - TFs-RGPs_ARCA-MONOMER - TFs-RGPs_PD00197
	276	b4122	fumB	C	fumarase B (fumarate hydratase class I), anaerobic isozyme	PWYS_ANARESP1-PWY - PWYS_FERMENTATION-PWY - PWYS_TCA - TFs-RGPs_ARCA-MONOMER - TFs-RGPs_DCUR-MONOMER - TFs-RGPs_NARL-MONOMER - TFs-RGPs_PC00004 - TFs-RGPs_PC00009 - TFs-RGPs_PD00196 - TFs-RGPs_PD00197
	277	b4139	aspA	E	aspartate ammonia-lyase (aspartase)	TFs-RGPs_PC00004 - TFs-RGPs_PD00197
	277	b4123	dcuB	R	anaerobic C4-dicarboxylate transporter	TFs-RGPs_DCUR-MONOMER - TFs-RGPs_NARL-MONOMER - TFs-RGPs_PC00004 - TFs-RGPs_PD00197
	277	b4138	dcuA	R	anaerobic C4-dicarboxylate transporter	TFs-RGPs_PC00004 - TFs-RGPs_PD00197
	278	b1613	manA	G	mannose-6-phosphate isomerase	PWYS_COLANSYN-PWY - PWYS_MANGDPMET-PWY - PWYS_MANNCAT-PWY
	278	b2048	cpsG	G	phosphomannomutase	PWYS_COLANSYN-PWY - PWYS_MANGDPMET-PWY
	278	b2049	cpsB	GM	mannose-1-phosphate guanyltransferase	PWYS_COLANSYN-PWY - PWYS_MANGDPMET-PWY
	279	b1709	btuD	H	vitamin B12-transporter ATPase	PCs_ABC-5-CPLX - PCs_CPLX0-1862
	279	b1710	btuE	O	vitamin B12 transport	PCs_ABC-5-CPLX - PCs_CPLX0-1862
	279	b1711	btuC	H	vtamin B12-transporter permease	PCs_ABC-5-CPLX - PCs_CPLX0-1862
	280	b1814	sdaA	E	L-serine deaminase	PWYS_SERDEG-PWY - PWYS_THREOCAT-PWY - TFs-RGPs_PD00353
	280	b2797	sdaB	E	L-serine deaminase 2	PWYS_SERDEG-PWY - PWYS_THREOCAT-PWY
	280	b2796	sdaC	E	probable serine transporter
	281	b1991	cobT	H	nicotinate-nucleotide--dimethylbenzimidazole phosphoribosyltransferase	PWYS_COBALSYN-PWY
	281	b1992	cobS	H	cobalamin synthase	PWYS_COBALSYN-PWY
	281	b1993	cobU	H	adenosylcobinamide kinase	PWYS_COBALSYN-PWY
	282	b2075	yegN	V	multidrug transport protein (RND family)	PCs_TRANS-CPLX-202
	282	b2076	yegO	V	multidrug transport protein, outer membrane (RND family)	PCs_TRANS-CPLX-202
	282	b2077	yegB	GEP	multidrug transport protein (MFS family)
	283	b2092	gatC	G	PTS family enzyme IIC, galactitol-specific	PCs_CPLX0-231 - TFs-RGPs_PC00063
	283	b2094	gatA	GT	PTS family enzyme IIA, galactitol-specific	PCs_CPLX0-231 - TFs-RGPs_PC00063
	283	b2093	gatB	G	PTS family enzyme IIB, galactitol-specific	PCs_CPLX0-231 - TFs-RGPs_PC00063
	284	b2099	yegU	O	putative glycohydrolase
	284	b2100	yegV	G	putative kinase
	284	b2450	yffS	-	CPZ-55 prophage; putative transcriptional regulator
	285	b2125	yehT	KT	putative response regulator in two-compoent regulatory system
	285	b2126	yehU	T	putative 2-component sensor protein
	285	b2380	ypdA	T	putative sensor protein
	286	b4074	nrfE	O	formate-dependent nitrite reductase; involved in attachment of haem c to cytochrome c552	TFs-RGPs_EG10320-MONOMER - TFs-RGPs_NARL-MONOMER - TFs-RGPs_PC00027 - TFs-RGPs_PD00196 - TFs-RGPs_PD00197
	286	b4076	nrfG	O	part of formate-dependent nitrite reductase complex	TFs-RGPs_EG10320-MONOMER - TFs-RGPs_NARL-MONOMER - TFs-RGPs_PC00027 - TFs-RGPs_PD00196 - TFs-RGPs_PD00197
	286	b4075	nrfF	O	part of formate-dependent nitrite reductase complex	TFs-RGPs_EG10320-MONOMER - TFs-RGPs_NARL-MONOMER - TFs-RGPs_PC00027 - TFs-RGPs_PD00196 - TFs-RGPs_PD00197
	287	b2297	pta	C	phosphate acetyltransferase	PWYS_ACETATEUTIL-PWY - PWYS_FERMENTATION-PWY - PWYS_THREOCAT-PWY
	287	b2296	ackA	C	acetate/propionate kinase	PWYS_FERMENTATION-PWY - PWYS_THREOCAT-PWY
	287	b4248	yjgH	J	putative translation factor
	288	b2218	rcsC	T	hybrid sensory histidine kinase in two-component regulatory system with RcsB, regulates capsule biosynthesis, cell division genes, OsmC expression	PWYS_RCS-PWY
	288	b2370	evgS	TE	hybrid sensory histidine kinase in two-component regulatory system with EvgA, regulates multidrug resistance	PWYS_EVG-PWY
	288	b2369	evgA	TK	putative positive transcription regulator (sensor EvgS)	PWYS_EVG-PWY - TFs-RGPs_EVGA-MONOMER
	289	b2283	nuoG	C	NADH dehydrogenase gamma subunit	PCs_CPLX0-3361 - PCs_NADH-DHI-CPLX - PWYS_AERESPDON-PWY - PWYS_ANARESPDON-PWY - TFs-RGPs_ARCA-MONOMER - TFs-RGPs_NARL-MONOMER - TFs-RGPs_PC00027 - TFs-RGPs_PD00196 - TFs-RGPs_PD00197
	289	b2284	nuoF	C	NADH dehydrogenase I chain F	PCs_CPLX0-3361 - PCs_NADH-DHI-CPLX - PWYS_AERESPDON-PWY - PWYS_ANARESPDON-PWY - TFs-RGPs_ARCA-MONOMER - TFs-RGPs_NARL-MONOMER - TFs-RGPs_PC00027 - TFs-RGPs_PD00196 - TFs-RGPs_PD00197
	289	b2285	nuoE	C	ATP synthase subunit E	PCs_CPLX0-3361 - PCs_NADH-DHI-CPLX - PWYS_AERESPDON-PWY - PWYS_ANARESPDON-PWY - TFs-RGPs_ARCA-MONOMER - TFs-RGPs_NARL-MONOMER - TFs-RGPs_PC00027 - TFs-RGPs_PD00196 - TFs-RGPs_PD00197
	290	b2507	guaA	F	bifunctional GMP synthase/glutamine amidotransferase protein	PWYS_DENOVOPURINE2-PWY - TFs-RGPs_PC00004 - TFs-RGPs_PC00033 - TFs-RGPs_PD00196 - TFs-RGPs_PD03831
	290	b2508	guaB	F	inositol-5-monophosphate dehydrogenase	PWYS_DENOVOPURINE2-PWY - TFs-RGPs_PC00004 - TFs-RGPs_PC00033 - TFs-RGPs_PD00196 - TFs-RGPs_PD03831
	290	b2509	xseA	L	exodeoxyribonuclease VII large subunit	TFs-RGPs_PC00004
	291	b2405	xapR	K	regulator for xapA	TFs-RGPs_EG11146-MONOMER
	291	b2406	xapB	GEP	xanthosine permease	TFs-RGPs_EG11146-MONOMER
	291	b2407	xapA	F	purine nucleoside phosphorylase	PWYS_SALVPURINE2-PWY - TFs-RGPs_EG11146-MONOMER
	292	b2501	ppk	P	polyphosphate kinase
	292	b2502	ppx	FP	exopolyphosphatase
	292	b3779	gppA	FP	guanosine pentaphosphatase, also has exopolyphosphatase activity	PWYS_PPGPPMET-PWY
	293	b2780	pyrG	F	CTP synthetase	PWYS_PWY0-162
	293	b2827	thyA	F	thymidylate synthase	PWYS_1CMET2-PWY - PWYS_PWY0-166
	293	b2828	lgt	M	prolipoprotein diacylglyceryl transferase
	294	b2661	gabD	C	succinate-semialdehyde dehydrogenase I, NADP-dependent	PWYS_4AMINOBUTMETAB-PWY - TFs-RGPs_EG12386-MONOMER - TFs-RGPs_G7072-MONOMER - TFs-RGPs_PC00004 - TFs-RGPs_PD00288 - TFs-RGPs_PD00353
	294	b2662	gabT	E	4-aminobutyrate aminotransferase	PWYS_4AMINOBUTMETAB-PWY - TFs-RGPs_EG12386-MONOMER - TFs-RGPs_G7072-MONOMER - TFs-RGPs_PC00004 - TFs-RGPs_PD00288 - TFs-RGPs_PD00353
	294	b2663	gabP	E	gamma-aminobutyrate transport protein, RpoS-dependent (APC family)	TFs-RGPs_EG12386-MONOMER - TFs-RGPs_G7072-MONOMER - TFs-RGPs_PC00004 - TFs-RGPs_PD00288 - TFs-RGPs_PD00353
	295	b2677	proV	E	ATP-binding component of transport system for glycine, betaine and proline	PCs_ABC-26-CPLX - TFs-RGPs_PD00288
	295	b2678	proW	E	glycine/betaine/proline transport protein (ABC superfamily, membrane)	PCs_ABC-26-CPLX - TFs-RGPs_PD00288
	295	b2679	proX	E	glycine/betaine/proline transport protein (ABC superfamily, peri_bind)	PCs_ABC-26-CPLX - TFs-RGPs_PD00288
	296	b2741	rpoS	K	RNA polymerase sigma factor	PCs_RNAPS-CPLX - TFs-RGPs_EG12243-MONOMER - TFs-RGPs_PC00004
	296	b2742	nlpD	M	lipoprotein
	296	b2744	surE	R	acid phosphatase
	297	b2702	srlA	G	PTS family enzyme IIC, glucitol/sorbitol-specific	TFs-RGPs_PC00004 - TFs-RGPs_PD00283 - TFs-RGPs_PD00345
	297	b2704	srlB	G	PTS family enzyme IIA, glucitol/sorbitol-specific	PCs_CPLX-169 - TFs-RGPs_PC00004 - TFs-RGPs_PD00283 - TFs-RGPs_PD00345
	297	b2705	srlD	IQ	sorbitol-6-phosphate 2-dehydrogenase	PWYS_SORBDEG-PWY - TFs-RGPs_PC00004 - TFs-RGPs_PD00283 - TFs-RGPs_PD00345
	298	b2903	gcvP	E	glycine dehydrogenase	PCs_GCVMULTI-CPLX - PWYS_1CMET2-PWY - PWYS_GLYCLEAV-PWY - TFs-RGPs_EG11149-MONOMER - TFs-RGPs_PC00033 - TFs-RGPs_PD00339 - TFs-RGPs_PD00353
	298	b2904	gcvH	E	glycine cleavage system protein H	PCs_GCVMULTI-CPLX - PWYS_1CMET2-PWY - PWYS_GLYCLEAV-PWY - TFs-RGPs_EG11149-MONOMER - TFs-RGPs_PC00033 - TFs-RGPs_PD00339 - TFs-RGPs_PD00353
	298	b2905	gcvT	E	aminomethyltransferase	PCs_GCVMULTI-CPLX - PWYS_1CMET2-PWY - PWYS_GLYCLEAV-PWY - TFs-RGPs_EG11149-MONOMER - TFs-RGPs_PC00033 - TFs-RGPs_PD00339 - TFs-RGPs_PD00353
	299	b4193	ulaA	S	ascorbate-specific PTS system enzyme IIC	PCs_EIISGA - TFs-RGPs_G7854-MONOMER - TFs-RGPs_PC00004 - TFs-RGPs_PC00027
	299	b4195	ptxA	GT	putative PTS family enzyme IIA component, possibly ascorbate-specific	PCs_EIISGA - TFs-RGPs_G7854-MONOMER - TFs-RGPs_PC00004 - TFs-RGPs_PC00027
	299	b4302	sgcA	GT	KpLE2 phage-like element; putative PTS family enzyme IIA, sugar-specific (IIsgc)	PCs_EIISGC
	300	b3829	metE	E	5-methyltetrahydropteroyltriglutamate--homocysteine methyltransferase	PWYS_HOMOSER-METSYN-PWY - PWYS_SAM-PWY
	300	b3828	metR	K	regulator for metE and metH	TFs-RGPs_PD03938
	300	b4019	metH	E	B12-dependent methionine synthase	PWYS_1CMET2-PWY - PWYS_HOMOSER-METSYN-PWY - PWYS_SAM-PWY - TFs-RGPs_PD03938
	301	b2975	yghK	C	glycolate permease (LctP family)	TFs-RGPs_ARCA-MONOMER - TFs-RGPs_G7546-MONOMER - TFs-RGPs_PC00027
	301	b2976	glcB	C	malate synthase	PWYS_GLYOXDEG-PWY - TFs-RGPs_ARCA-MONOMER - TFs-RGPs_G7546-MONOMER - TFs-RGPs_PC00027
	301	b2977	glcG	R	conserved hypothetical protein, GlcG	TFs-RGPs_ARCA-MONOMER - TFs-RGPs_G7546-MONOMER - TFs-RGPs_PC00027
	302	b3603	lldP	C	L-lactate permease	TFs-RGPs_ARCA-MONOMER - TFs-RGPs_EG11088-MONOMER - TFs-RGPs_EG11962-MONOMER
	302	b3604	lldR	K	putative transcriptional repressor for L-lactate utilization (GntR family)	TFs-RGPs_ARCA-MONOMER - TFs-RGPs_EG11088-MONOMER - TFs-RGPs_EG11962-MONOMER
	302	b3605	lldD	C	L-lactate dehydrogenase	PWYS_AERESPDON-PWY - PWYS_ANARESPDON-PWY - TFs-RGPs_ARCA-MONOMER - TFs-RGPs_EG11088-MONOMER - TFs-RGPs_EG11962-MONOMER
	303	b3113	tdcF	J	hypothetical protein	TFs-RGPs_PC00004 - TFs-RGPs_PC00027 - TFs-RGPs_PD00268 - TFs-RGPs_PD03292
	303	b4029	yjbH	-	hypothetical protein
	303	b4243	yjgF	J	hypothetical protein
	304	b3116	tdcC	E	L-threonine/L-serine permease, anaerobically inducible (HAAAP family)	TFs-RGPs_PC00004 - TFs-RGPs_PC00027 - TFs-RGPs_PD00268 - TFs-RGPs_PD03292
	304	b3117	tdcB	E	threonine dehydratase	PWYS_THREOCAT-PWY - TFs-RGPs_PC00004 - TFs-RGPs_PC00027 - TFs-RGPs_PD00268 - TFs-RGPs_PD03292
	304	b3118	tdcA	K	transcriptional activator for amino acids degradation (LysR family)	TFs-RGPs_PC00004 - TFs-RGPs_PC00027 - TFs-RGPs_PD00268 - TFs-RGPs_PD03292
	305	b3134	agaW	G	PTS family enzyme IIC component 2, N-acetylgalactosamine-specific	TFs-RGPs_G7630-MONOMER - TFs-RGPs_PC00004
	305	b3135	agaA	G	putative N-acetylgalactosamine-6-phosphate deacetylase	TFs-RGPs_G7630-MONOMER - TFs-RGPs_PC00004
	305	b3141	agaI	G	putative galactosamine-6-phosphate isomerase	TFs-RGPs_G7630-MONOMER
	306	b3501	arsR	K	transcriptional repressor for arsenical resistance (ArsR family)
	306	b3502	arsB	P	arsenical pump (Ars family)	PCs_CPLX-6
	306	b3503	arsC	P	arsenate reductase
	307	b3564	xylB	G	xylulokinase	PWYS_XYLCAT-PWY - TFs-RGPs_EG20253-MONOMER - TFs-RGPs_PC00004
	307	b3565	xylA	G	xylose isomerase	PWYS_XYLCAT-PWY - TFs-RGPs_EG20253-MONOMER - TFs-RGPs_PC00004
	307	b3569	xylR	K	putative regulator of xyl operon	TFs-RGPs_EG20253-MONOMER
	308	b3566	xylF	G	D-xylose transport protein (ABC superfamily, peri_bind)	PCs_ABC-33-CPLX - TFs-RGPs_EG20253-MONOMER
	308	b3567	xylG	G	D-xylose transport protein (ABC superfamily, atp_bind)	PCs_ABC-33-CPLX - TFs-RGPs_EG20253-MONOMER
	308	b3568	xylH	G	D-xylose transport permease (ABC superfamily, membrane)	PCs_ABC-33-CPLX - TFs-RGPs_EG20253-MONOMER
	309	b3621	rfaC	M	ADP-heptose; LPS heptosyl transferase I
	309	b3622	rfaL	M	O-antigen ligase
	309	b3626	rfaJ	M	UDP-D-glucose:(galactosyl)lipopolysaccharide glucosyltransferase
	310	b3625	rfaY	-	lipopolysaccharide core biosynthesis
	310	b3623	rfaK	M	probably hexose transferase; lipopolysaccharide core biosynthesis
	310	b3624	rfaZ	-	lipopolysaccharide core biosynthesis
	311	b3630	rfaP	-	lipopolysaccharide core biosynthesis; kinase for core heptose of lipopolysaccharide
	311	b3632	rfaQ	M	lipopolysaccharide core biosynthesis
	311	b3631	rfaG	M	glucosyltransferase I
	312	b3627	rfaI	M	UDP-D-galactose:(glucosyl)lipopolysaccharide- alpha-1,3-D-galactosyltransferase
	312	b3628	rfaB	M	UDP-D-galactose:(glucosyl)lipopolysaccharide-1, 6- D-galactosyltransferase
	312	b3629	rfaS	-	lipopolysaccharide core biosynthesis
	313	b3833	ubiE	H	ubiquinone/menaquinone biosynthesis methyltransferase	PWYS_MENAQUINONESYN-PWY - PWYS_UBISYN-PWY
	313	b3834	yigP	S	hypothetical protein
	313	b3835	ubiB	HC	putative ubiquinone biosynthesis protein UbiB	PWYS_UBISYN-PWY
	314	b3875	yshA	-	hypothetical protein
	314	b3876	yihO	G	putative permease
	314	b3877	yihP	G	putative permease
	315	b3894	fdoG	C	formate dehydrogenase-O, major subunit	PCs_FORMATEDEHYDROGO-CPLX - PWYS_ANARESPDON-PWY
	315	b3892	fdoI	C	formate dehydrogenase, cytochrome B556 (FDO) subunit	PCs_FORMATEDEHYDROGO-CPLX - PWYS_ANARESPDON-PWY
	315	b3893	fdoH	C	formate dehydrogenase-O, Fe-S subunit	PCs_FORMATEDEHYDROGO-CPLX - PWYS_ANARESPDON-PWY
	316	b4318	fimF	NU	fimbrial morphology	PCs_CPLX0-3401 - TFs-RGPs_PC00027 - TFs-RGPs_PD00288 - TFs-RGPs_PD00353
	316	b4319	fimG	NU	fimbrial morphology	PCs_CPLX0-3401 - TFs-RGPs_PC00027 - TFs-RGPs_PD00288 - TFs-RGPs_PD00353
	316	b4320	fimH	-	minor fimbrial subunit	PCs_CPLX0-3401 - TFs-RGPs_PC00027 - TFs-RGPs_PD00288 - TFs-RGPs_PD00353
						PCs_CPLX0-3401 - TFs-RGPs_PC00027 - TFs-RGPs_PD00288 - TFs-RGPs_PD00353
	FUNCTIONAL NETWORK
	Module#	Locus id	Gene name	COGs	Description
	1	b3295	rpoA	K	DNA-directed RNA polymerase alpha subunit	PCs_APORNAP-CPLX - PCs_CPLX0-221 - PCs_CPLX0-222 - PCs_RNAP32-CPLX - PCs_RNAP54-CPLX - PCs_RNAP70-CPLX - PCs_RNAPE-CPLX - PCs_RNAPS-CPLX
	1	b3231	rplM	J	50S ribosomal protein L13
	1	b3320	rplC	J	50S ribosomal protein L3
	1	b3296	rpsD	J	30S ribosomal protein S4
	1	b3303	rpsE	J	30S ribosomal protein S5
	1	b3982	nusG	K	transcription antitermination protein NusG
	1	b3306	rpsH	J	30S ribosomal protein S8
	1	b3342	rpsL	J	30S ribosomal protein S12
	1	b3984	rplA	J	50S ribosomal protein L1
	1	b3230	rpsI	J	30S ribosomal protein S9
	1	b3298	rpsM	J	30S ribosomal protein S13
	1	b3319	rplD	J	50S ribosomal protein L4
	1	b3305	rplF	J	50S ribosomal protein L6
	1	b3304	rplR	J	50S ribosomal protein L18
	1	b3294	rplQ	J	50S ribosomal protein L17
	1	b3314	rpsC	J	30S ribosomal protein S3
	1	b4118	melR	K	regulator of melibiose operon	TFs-RGPs_PC00004 - TFs-RGPs_PD00208
	1	b3313	rplP	J	50S ribosomal protein L16
	1	b3317	rplB	J	50S ribosomal protein L2
	1	b3995	rsd	K	regulator of sigma D
	1	b3301	rplO	J	50S ribosomal protein L15
	1	b3307	rpsN	J	30S ribosomal protein S14
	1	b3302	rpmD	J	50S ribosomal protein L30
	1	b3312	rpmC	J	50S ribosomal protein L29
	1	b0884	infA	J	translation initiation factor IF-1
	1	b3297	rpsK	J	30S ribosomal protein S11
	1	b3185	rpmA	J	50S ribosomal protein L27
	1	b3261	K	KL	DNA-binding protein Fis	TFs-RGPs_PC00004 - TFs-RGPs_PC00027 - TFs-RGPs_PD00196
	1	b0474	adk	F	adenylate kinase	PWYS_DENOVOPURINE2-PWY
	1	b1334	fnr	T	transcriptional regulation of aerobic, anaerobic respiration, osmotic balance	TFs-RGPs_PD00197
	2	b1945	fliM	N	flagellar motor switch protein	PCs_FLAGELLAR-MOTOR-COMPLEX - TFs-RGPs_EG10320-MONOMER
	2	b1946	N	NU	flagellar motor switch protein	TFs-RGPs_EG10320-MONOMER
	2	b1939	fliG	N	flagellar motor protein
	2	b1938	N	NU	flagellar M-ring protein	PCs_FLAGELLAR-MOTOR-COMPLEX
	2	b1950	N	NU	flagellar biosynthesis protein	TFs-RGPs_EG10320-MONOMER
	2	b1948	N	NU	flagellar biosynthesis protein	TFs-RGPs_EG10320-MONOMER
	2	b1923	fliC	N	flagellar biosynthesis protein	TFs-RGPs_EG11544-MONOMER - TFs-RGPs_PD00288
	2	b1880	N	NU	flagellar biosynthesis protein
	2	b1879	N	NU	flagellar biosynthesis protein
	2	b1922	-	K	flagellar biosynthesis sigma factor FliA	PCs_CPLX0-222 - TFs-RGPs_EG10320-MONOMER - TFs-RGPs_PD00288
	2	b1949	N	NU	flagellar biosynthesis protein	TFs-RGPs_EG10320-MONOMER
	2	b1947	-	N	flagellar biosynthesis	TFs-RGPs_EG10320-MONOMER
	2	b1944	fliL	N	flagellar biosynthesis protein	TFs-RGPs_EG10320-MONOMER
	2	b1943	fliK	N	flagellar hook-length control protein
	2	b1942	N	NUO	flagellar protein
	2	b1941	N	NU	flagellum-specific ATP synthase
	2	b1940	N	NU	flagellar assembly protein
	2	b1937	N	NU	flagellar basal body protein
	2	b1925	O	NUO	flagellar protein FliS
	2	b1926	fliT	-	flagellar biosynthesis; putative export chaperone for FliD
	2	b1924	fliD	N	flagellar hook-associated protein
	2	b1878	flhE	-	flagellar protein
	2	b0229	N	NU	flagellar biosynthesis
	3	b3477	E	EP	nickel transport protein (ABC superfamily, membrane)	PCs_ABC-20-CPLX - TFs-RGPs_EG11519-MONOMER - TFs-RGPs_PD00197
	3	b3478	E	EP	nickel transport proein (ABC superfamily, membrane)	PCs_ABC-20-CPLX - TFs-RGPs_EG11519-MONOMER - TFs-RGPs_PD00197
	3	b3476	nikA	E	nickel transport protein (ABC superfamily, peri_bind)	PCs_ABC-20-CPLX - TFs-RGPs_EG11519-MONOMER - TFs-RGPs_PD00197
	3	b3480	E	EP	ATP-binding protein of nickel transport system	PCs_ABC-20-CPLX - TFs-RGPs_EG11519-MONOMER - TFs-RGPs_PD00197
	3	b3479	E	EP	ATP-binding protein of nickel transport system	PCs_ABC-20-CPLX - TFs-RGPs_EG11519-MONOMER - TFs-RGPs_PD00197
	3	b3542	E	EP	dipeptide transport protein 2 (ABC superfamily, membrane)	PCs_ABC-8-CPLX - TFs-RGPs_PC00027
	3	b1486	E	EP	putative ABC transport system permease protein	PCs_ABC-59-CPLX - TFs-RGPs_GLNG-CPLX
	3	b2179	yejE	R	putative oligopeptide transport protein (ABC superfamily, membrane)	PCs_ABC-41-CPLX
	3	b1244	E	EP	oligopeptide permease ABC transporter membrane component	PCs_ABC-22-CPLX - TFs-RGPs_PD00353
	3	b0831	E	EP	putative dipeptide transport protein (ABC superfamily, membrane)	PCs_ABC-49-CPLX
	3	b0832	E	EP	putative dipeptide transport protein (ABC superfamily, membrane)	PCs_ABC-49-CPLX
	3	b3543	E	EP	dipeptide transport protein 1 (ABC superfamily, membrane)	PCs_ABC-8-CPLX - TFs-RGPs_PC00027
	3	b3544	dppA	E	dipeptide transport protein	PCs_ABC-8-CPLX - TFs-RGPs_PC00027
	3	b1243	oppA	E	oligopeptide transport protein (ABC superfamily, peri_bind)	PCs_ABC-22-CPLX - TFs-RGPs_PD00353
	3	b3020	ygiS	E	putative oligipeptide transport protein (ABC superfamily, peri_bind)
	3	b2178	yejB	R	putative oligopeptide transport protein (ABC superfamily, membrane)	PCs_ABC-41-CPLX
	3	b1487	yddS	E	putative ABC transport system periplasmic binding protein	PCs_ABC-59-CPLX - TFs-RGPs_GLNG-CPLX
	3	b1485	E	EP	putative ABC transport system permease protein	PCs_ABC-59-CPLX - TFs-RGPs_GLNG-CPLX
	3	b1329	mppA	E	periplasmic murein tripeptide (L-Ala-gamma-D-Glut-m-DAP) permease
	3	b1293	sapB	V	homolog of Salmonella peptide transport permease protein	PCs_ABC-29-CPLX
	3	b1245	E	EP	homolog of Salmonella oligopeptide transport permease protein	PCs_ABC-22-CPLX - TFs-RGPs_PD00353
	3	b0830	yliB	E	putative dipeptide transport protein (ABC superfamily, peri_bind)	PCs_ABC-49-CPLX
	3	b2180	yejF	R	putative ATP-binding component of a transport system	PCs_ABC-41-CPLX
	4	b0094	ftsA	D	cell division protein	TFs-RGPs_PC00084 - TFs-RGPs_PD02198
	4	b0084	ftsI	M	division-specific transpeptidase, penicillin-binding protein 3
	4	b0089	ftsW	D	cell division; membrane protein involved in shape determination
	4	b0093	ftsQ	M	cell division protein; ingrowth of wall at septum	TFs-RGPs_PD02198
	4	b0083	ftsL	D	cell division protein; ingrowth of wall at septum
	4	b0085	murE	M	UDP-N-acetylmuramoylalanyl-D-glutamate--2,6-diaminopimelate ligase	PWYS_PEPTIDOGLYCANSYN-PWY
	4	b0090	murG	M	N-acetylglucosaminyl transferase	PWYS_PEPTIDOGLYCANSYN-PWY
	4	b0091	murC	M	UDP-N-acetylmuramate--L-alanine ligase	PWYS_PEPTIDOGLYCANSYN-PWY
	4	b0088	murD	M	UDP-N-acetylmuramoyl-L-alanyl-D-glutamate synthetase	PWYS_PEPTIDOGLYCANSYN-PWY
	4	b0087	mraY	M	phospho-N-acetylmuramoyl-pentapeptide-transferase	PWYS_PEPTIDOGLYCANSYN-PWY
	4	b0086	murF	M	D-alanine:D-alanine-adding enzyme	PWYS_PEPTIDOGLYCANSYN-PWY
	4	b0096	lpxC	M	UDP-3-O-[3-hydroxymyristoyl] N-acetylglucosamine deacetylase	PWYS_NAGLIPASYN-PWY
	4	b3933	ftsN	D	essential cell division protein
	4	b0081	yabB	S	hypothetical protein
	4	b0381	ddl	M	D-alanylalanine synthetase	PWYS_PEPTIDOGLYCANSYN-PWY
	4	b0092	ddl	M	D-alanylalanine synthetase	PWYS_PEPTIDOGLYCANSYN-PWY
	4	b4233	mpl	M	UDP-N-acetylmuramate:L-alanyl-gamma-D-glutamyl-meso-diaminopimelate ligase	TFs-RGPs_PC00004
	4	b2748	ftsB	D	cell divison protein FtsB
	4	b1168	ycgG	T	putative protease
	5	b4086	alsC	G	D-allose transport system permease	PCs_ABC-42-CPLX - TFs-RGPs_G7821-MONOMER
	5	b4088	alsB	G	D-allose-binding periplasmic protein	PCs_ABC-42-CPLX - TFs-RGPs_G7821-MONOMER
	5	b3750	rbsC	G	ribose high-affinity ABC transporter permease component	PCs_ABC-28-CPLX - TFs-RGPs_PC00004 - TFs-RGPs_PD03867
	5	b3751	rbsB	G	D-ribose periplasmic binding protein	PCs_ABC-28-CPLX - TFs-RGPs_PC00004 - TFs-RGPs_PD03867
	5	b4227	ytfQ	G	putative D-ribose transport protein (ABC superfamily, peri_bind)	PCs_ABC-46-CPLX
	5	b4230	ytfT	G	putative sugar transport protein (ABC superfamily, membrane)	PCs_ABC-46-CPLX
	5	b1514	ydeY	G	putative ABC transport system permease protein	PCs_ABC-58-CPLX
	5	b4087	alsA	G	D-allose transport ATP-binding protein	PCs_ABC-42-CPLX - TFs-RGPs_G7821-MONOMER
	5	b3752	rbsK	G	ribokinase	PWYS_RIBOKIN-PWY - TFs-RGPs_PC00004 - TFs-RGPs_PD03867
	5	b3753	rbsR	K	regulator for rbs operon	TFs-RGPs_PD03867
	5	b3749	rbsA	G	ATP-binding component of D-ribose high-affinity transport system	PCs_ABC-28-CPLX - TFs-RGPs_PC00004 - TFs-RGPs_PD03867
	5	b3748	rbsD	G	D-ribose high-affinity transport system; membrane-associated protein	TFs-RGPs_PC00004 - TFs-RGPs_PD03867
	5	b4231	yjfF	G	putative sugar transport protein (ABC superfamily, membrane)	PCs_ABC-46-CPLX
	5	b2546	yphD	G	putative sugar transport protein (ABC superfamily, membrane)	PCs_ABC-60-CPLX
	5	b1898	--
	6	b1882	cheY	T	chemotactic response regulator in two-component regulatory system with CheA, transmits signals to FliM flagelllar motor component	PWYS_CHE-PWY
	6	b1888	N	NT	chemotactic sensory histidine kinase (soluble) in two-component regulatory system with CheB and CheY, senses chemotactic signal	PCs_TAP-CPLX - PCs_TAP-GLN - PCs_TAP-GLU - PCs_TAP-GLUME - PCs_TAR-CPLX - PCs_TAR-GLN - PCs_TAR-GLU - PCs_TAR-GLUME - PCs_TRG-CPLX - PCs_TRG-GLN - PCs_TRG-GLU - PCs_TRG-GLUME - PCs_TSR-CPLX - PCs_TSR-GLN - PCs_TSR-GLU - PCs_TSR-GLUME - PWYS_CHE-PWY
	6	b1886	N	NT	methyl-accepting chemotaxis protein II, aspartate sensor receptor	PCs_TAR-CPLX - PCs_TAR-GLN - PCs_TAR-GLU - PCs_TAR-GLUME
	6	b1887	N	NT	positive regulator of CheA protein activity	PCs_TAP-CPLX - PCs_TAP-GLN - PCs_TAP-GLU - PCs_TAP-GLUME - PCs_TAR-CPLX - PCs_TAR-GLN - PCs_TAR-GLU - PCs_TAR-GLUME - PCs_TRG-CPLX - PCs_TRG-GLN - PCs_TRG-GLU - PCs_TRG-GLUME - PCs_TSR-CPLX - PCs_TSR-GLN - PCs_TSR-GLU - PCs_TSR-GLUME
	6	b1884	N	NT	chemotactic response, glutamate methyltransferase	PWYS_CHE-PWY
	6	b1883	N	NT	chemotaxis-specific methylesterase	PWYS_CHE-PWY
	6	b1881	N	NT	chemotactic response, CheY protein phophatase
	6	b4355	N	NT	methyl-accepting chemotaxis protein I, serine sensor receptor	PCs_TSR-CPLX - PCs_TSR-GLN - PCs_TSR-GLU - PCs_TSR-GLUME
	6	b1890	motA	N	flagellar motor protein	PCs_FLAGELLAR-MOTOR-COMPLEX
	6	b1889	motB	N	flagellar motor protein	PCs_FLAGELLAR-MOTOR-COMPLEX
	6	b1421	N	NT	methyl-accepting chemotaxis protein III, ribose and galactose sensor receptor	PCs_TRG-CPLX - PCs_TRG-GLN - PCs_TRG-GLU - PCs_TRG-GLUME
	6	b3072	N	NT	aerotaxis sensor receptor, flavoprotein
	6	b1885	N	NT	methyl-accepting chemotaxis protein IV, peptide sensor receptor	PCs_TAP-CPLX - PCs_TAP-GLN - PCs_TAP-GLU - PCs_TAP-GLUME
	6	b0230	mbhA	N	flagellar motor protein
	7	b2308	hisQ	E	histidine and lysine/arginine/ornithine transport system (ABC superfamily, membrane)	PCs_ABC-14-CPLX - PCs_ABC-3-CPLX - TFs-RGPs_GLNG-CPLX
	7	b2309	E	ET	histidine transport protein (ABC superfamily, peri_bind)	PCs_ABC-14-CPLX - TFs-RGPs_GLNG-CPLX
	7	b2310	E	ET	lysine-, arginine-, ornithine-binding periplasmic protein	PCs_ABC-3-CPLX - TFs-RGPs_GLNG-CPLX
	7	b0861	artM	E	arginine 3rd transport system permease protein	PCs_ABC-4-CPLX
	7	b0862	artQ	E	arginine 3rd transport system permease protein	PCs_ABC-4-CPLX
	7	b0864	artP	E	ATP-binding component of 3rd arginine transport system	PCs_ABC-4-CPLX
	7	b2307	hisM	E	histidine and lysine/arginine/ornithine transport protein (ABC superfamily, membrane)	PCs_ABC-14-CPLX - PCs_ABC-3-CPLX - TFs-RGPs_GLNG-CPLX
	7	b1920	E	ET	cysteine transport protein (ABC superfamily, peri_bind)	TFs-RGPs_EG10320-MONOMER - TFs-RGPs_PD00288
	7	b0863	E	ET	arginine 3rd transport system periplasmic binding protein	PCs_ABC-4-CPLX
	7	b0860	E	ET	arginine 3rd transport system periplasmic binding protein	PCs_ABC-4-CPLX
	7	b0811	E	ET	glutamine ABC transporter periplasmic-binding protein	PCs_ABC-12-CPLX - TFs-RGPs_GLNG-CPLX - TFs-RGPs_PC00027
	7	b1921	fliZ	-	putative regulator of FliA	TFs-RGPs_EG10320-MONOMER - TFs-RGPs_PD00288
	7	b4106	phnC	P	ATP-binding component of phosphonate transport	PCs_ABC-23-CPLX - TFs-RGPs_PHOB-MONOMER
	8	b1079	flgH	N	flagellar L-ring protein precursor
	8	b1080	-	N	flagellar P-ring protein precursor	PCs_FLAGELLAR-MOTOR-COMPLEX
	8	b1082	flgK	N	flagellar hook-associated protein
	8	b1078	flgG	N	flagellar biosynthesis, cell-distal portion of basal-body rod	PCs_FLAGELLAR-MOTOR-COMPLEX
	8	b1077	flgF	N	flagellar biosynthesis, cell-proximal portion of basal-body rod	PCs_FLAGELLAR-MOTOR-COMPLEX
	8	b1076	flgE	N	flagellar hook protein
	8	b1075	flgD	N	flagellar biosynthesis, initiation of hook assembly
	8	b1074	flgC	N	flagellar basal body rod protein	PCs_FLAGELLAR-MOTOR-COMPLEX
	8	b1073	flgB	N	flagellar basal body rod protein	PCs_FLAGELLAR-MOTOR-COMPLEX
	8	b1083	flgL	N	flagellar hook-associated protein
	8	b1081	N	NUMO	flagellar biosynthesis protein
	8	b1072	N	NO	flagellar basal body P-ring biosynthesis protein
	8	b1070	N	NUO	flagellar biosynthesis; believed to be export chaperone for FlgK and FlgL
	9	b3270	yhdY	E	putative amino acid transport protein (ABC superfamily, membrane)	PCs_ABC-52-CPLX - TFs-RGPs_GLNG-CPLX
	9	b1918	yecS	E	putative amino acid transport protein (ABC superfamily, membrane)
	9	b0810	glnP	E	glutamine ABC transporter permease component	PCs_ABC-12-CPLX - TFs-RGPs_GLNG-CPLX - TFs-RGPs_PC00027
	9	b0653	gltK	E	glutamate/aspartate transport protein (ABC superfamily, membrane)	PCs_ABC-13-CPLX
	9	b0809	glnQ	E	glutamine ABC transporter ATP-binding component	PCs_ABC-12-CPLX - TFs-RGPs_GLNG-CPLX - TFs-RGPs_PC00027
	9	b3269	-	E	putative amino acid transport protein (ABC superfamily, membrane)	PCs_ABC-52-CPLX - TFs-RGPs_GLNG-CPLX
	9	b0654	gltJ	E	glutamate/aspartate transport protein (ABC superfamily, membrane)	PCs_ABC-13-CPLX
	9	b2306	hisP	E	ATP-binding component of histidine transport	PCs_ABC-14-CPLX - PCs_ABC-3-CPLX - TFs-RGPs_GLNG-CPLX
	9	b1917	yecC	E	putative ATP-binding component of a transport system
	9	b3271	yhdZ	E	putative ATP-binding component of a transport system	PCs_ABC-52-CPLX - TFs-RGPs_GLNG-CPLX
	9	b0655	E	ET	glutamate/aspartate periplasmic binding protein
	9	b0652	gltL	E	ATP-binding protein of glutamate/aspartate transport system	PCs_ABC-13-CPLX
	10	b4316	-	NU	periplasmic chaperone, required for type 1 fimbriae	TFs-RGPs_PC00027 - TFs-RGPs_PD00288 - TFs-RGPs_PD00353
	10	b0140	N	NU	probable pilin chaperone similar to PapD	TFs-RGPs_PC00027
	10	b4315	N	NU	fimbrial protein	TFs-RGPs_PC00027 - TFs-RGPs_PD00288 - TFs-RGPs_PD00353
	10	b4314	N	NU	major type 1 subunit fimbrin (pilin)	PCs_CPLX0-3401 - TFs-RGPs_PC00027 - TFs-RGPs_PD00288 - TFs-RGPs_PD00353
	10	b3143	N	NU	putative chaperone
	10	b3047	-	NU	putative periplasmic chaperone
	10	b2336	N	NU	putative chaperone
	10	b2110	N	NU	putative chaperone
	10	b0939	N	NU	putative fimbrial chaperone
	10	b0717	N	NU	putative chaperone
	10	b0531	N	NU	putative chaperone
	11	b4096	phnL	P	ATP-binding component of phosphonate transport	TFs-RGPs_PHOB-MONOMER
	11	b4097	-	P	ATP-binding component of phosphonate transport	TFs-RGPs_PHOB-MONOMER
	11	b1291	sapD	V	peptide transport protein (ABC superfamily, atp_bind)	PCs_ABC-29-CPLX
	11	b1246	-	EP	oligopeptide transporter ATP-binding component	PCs_ABC-22-CPLX - TFs-RGPs_PD00353
	11	b1247	oppF	E	homolog of Salmonella ATP-binding protein of oligopeptide ABC transport system	PCs_ABC-22-CPLX - TFs-RGPs_PD00353
	11	b1292	sapC	V	homolog of Salmonella peptide transport permease protein	PCs_ABC-29-CPLX
	11	b3541	E	EP	dipeptide transport protein (ABC superfamily, atp_bind)	PCs_ABC-8-CPLX - TFs-RGPs_PC00027
	11	b3540	dppF	E	dipeptide transport protein (ABC superfamily, atp_bind)	PCs_ABC-8-CPLX - TFs-RGPs_PC00027
	11	b1484	E	EP	putative ABC transport system ATP-binding protein	PCs_ABC-59-CPLX - TFs-RGPs_GLNG-CPLX
	11	b1483	E	EP	putative ABC transport system ATP-binding protein	PCs_ABC-59-CPLX - TFs-RGPs_GLNG-CPLX
	11	b0829	yliA	R	putative ATP-binding component of a transport system	PCs_ABC-49-CPLX
	12	b1224	narG	C	nitrate reductase 1, alpha subunit	PCs_CPLX0-3261 - PCs_NITRATREDUCTA-CPLX - TFs-RGPs_NARL-MONOMER - TFs-RGPs_PC00027 - TFs-RGPs_PD00197
	12	b1225	narH	C	nitrate reductase 1, Fe-S (beta) subunit	PCs_CPLX0-3261 - PCs_NITRATREDUCTA-CPLX - TFs-RGPs_NARL-MONOMER - TFs-RGPs_PC00027 - TFs-RGPs_PD00197
	12	b1227	narI	C	nitrate reductase 1, cytochrome b(NR), gamma subunit	PCs_NITRATREDUCTA-CPLX - TFs-RGPs_NARL-MONOMER - TFs-RGPs_PC00027 - TFs-RGPs_PD00197
	12	b1226	narJ	C	nitrate reductase 1, delta subunit, assembly function	TFs-RGPs_NARL-MONOMER - TFs-RGPs_PC00027 - TFs-RGPs_PD00197
	12	b1468	narZ	C	cryptic nitrate reductase 2 alpha subunit	PCs_NITRATREDUCTZ-CPLX
	12	b1467	narY	C	cryptic nitrate reductase 2 beta subunit	PCs_NITRATREDUCTZ-CPLX
	12	b1465	narV	C	cryptic nitrate reductase 2 gamma subunit	PCs_NITRATREDUCTZ-CPLX
	12	b1223	narK	P	nitrite extrusion protein	TFs-RGPs_NARL-MONOMER - TFs-RGPs_PC00027 - TFs-RGPs_PD00197
	12	b1469	narU	P	nitrate extrusion protein (MFS family)
	12	b1466	narW	C	cryptic nitrate reductase 2 delta subunit
	13	b2167	fruA	G	PTS family enzyme IIB'BC, fructose-specific	PCs_CPLX-158 - TFs-RGPs_PC00061
	13	b2168	fruK	G	1-phosphofructokinase	TFs-RGPs_PC00061
	13	b2169	fruB	G	PTS family enzyme IIA (N-terminal); FPr (C-terminal), fructose-specific	PCs_CPLX-158 - TFs-RGPs_PC00061
	13	b3949	frwC	G	PTS family enzyme IIC, fructose-mannitol-specific	PCs_CPLX-160
	13	b3950	frwB	G	PTS family enzyme IIB, fructose-mannitol-specific	PCs_CPLX-160
	13	b3899	-	G	PTS family enzyme IIBC, fructose-specific	PCs_CPLX-159
	13	b2735	K	KG	putative DEOR-type transcriptional regulator
	13	b2386	ypdG	G	putative PTS family enzyme IIC component, fructose-specific
	13	b1723	-	G	6-phosphofructokinase II	PWYS_GALACTITOLCAT-PWY - PWYS_GLYCOLYSIS - PWYS_MANNIDEG-PWY - PWYS_SORBDEG-PWY
	13	b0731	G	GT	PTS family enzyme IIA (N-terminal); enzyme IIBC (C-terminal), induction of ompC	PCs_CPLX-163 - TFs-RGPs_PC00103
	14	b2422	cysA	P	ATP-binding component of sulfate permease A protein; chromate resistance	PCs_ABC-7-CPLX - PCs_ABC-70-CPLX - TFs-RGPs_PC00040
	14	b3917	sbp	P	periplasmic sulfate-binding protein	PCs_ABC-70-CPLX
	14	b2423	cysW	-	sulfate transport system permease W protein	PCs_ABC-7-CPLX - PCs_ABC-70-CPLX - TFs-RGPs_PC00040
	14	b2425	cysP	P	thiosulfate binding protein	PCs_ABC-7-CPLX - TFs-RGPs_PC00040
	14	b2421	cysM	E	cysteine synthase B (O-acetylserine sulfhydrolase B)	TFs-RGPs_PC00040
	14	b2424	cysU	O	sulfate, thiosulfate transport system permease T protein	PCs_ABC-7-CPLX - PCs_ABC-70-CPLX - TFs-RGPs_PC00040
[truncated: 1,842 more rows]
