# Supplementary material for: The Modular Organization of Protein Interactions in Escherichia coli
Source: PLoS Comput Biol. 2009 Oct 2;5(10):e1000523. doi: 10.1371/journal.pcbi.1000523 (PMC2739439; doi:10.1371/journal.pcbi.1000523)
Supplement: Table S4 — Enrichment of COG functional categories in modules derived from the three networks. Functional modules were predicted using the MCL algorithm (see Methods). For each module the major COG category was determined as the category assigned to the most proteins in that module, the % of proteins annotated with the major COG category is indicated. Module size indicates the number of proteins associated with the functional module. P-values were calculated based on expectation using 10000 random modules of equal size. * = p-value <0.1; ** = p-value <0.01; *** = p-value <0.001. (0.09 MB XLS) [file pcbi.1000523.s014.xls]

## Sheet: Sheet1
SUPPLEMENTAL TABLE 4. Enrichment of COG functional categories in modules derived from the three networks
	P-values were derived by randomizing 10000 complexes of similar size and checking for functional overlapping. p-values <0.001 are represented by ** and < 0.01 by *.
	Networks are ordered as Combined; Functional; and Experimental.
	Linking modules are defined as those containing proteins with different COG annotations (excluding the uninformative categories, R, S and -)
	Novel modules are defined as those containing proteins annotated only with COG annotations R,S or -.
	COMBINED NETWORK
	Module#	Major COG ID	% of proteins with Major COG ID	Module Size	P-Value	Linking Module	Novel Module
	1	J	0.28	64	0**
	2	S	0.14	55	0.1343
	3	N	0.47	36	0**
	4	J	0.7	34	0**
	5	O	0.16	31	0.2644
	6	O	0.08	24	0.9991
	7	EP	0.52	21	0**
	8	J	0.55	20	0**
	9	M	0.66	18	0**
	10	L	0.17	17	0.5293
	11	P	0.18	16	0.4831
	12	K	0.56	16	0**
	13	IQ	0.33	15	0.0142
	14	L	0.8	15	0**
	15	NT	0.71	14	0**
	16	G	0.92	14	0**
	17	C	0.28	14	0.0621
	18	C	0.3	13	0.0496
	19	ET	0.46	13	0.0012*
	20	J	0.66	12	0**
	21	NU	0.91	12	0**
	22	E	0.91	12	0**
	23	EP	0.41	12	0.0038*
	24	C	0.72	11	0**
	25	G	0.81	11	0**
	26	L	0.7	10	0**
	27	C	0.8	10	0**
	28	TK	0.6	10	0**
	29	C	0.66	9	0**
	30	O	0.22	9	0.6726
	31	C	1	9	0**
	32	G	0.88	9	0**
	33	E	0.33	9	0.1078
	34	T	0.11	9	1
	35	NU	1	9	0**
	36	L	0.33	9	0.1078
	37	E	1	8	0**
	38	S	0.25	8	0.5895
	39	S	0.12	8	0.9998
	40	U	0.37	8	0.0798
	41	V	0.25	8	0.5895
	42	E	1	8	0**
	43	E	0.71	7	0**
	44	M	0.28	7	0.4837
	45	EH	0.33	7	0.0483
	46	H	0.71	7	0**
	47	C	0.33	7	0.0483
	48	L	0.71	7	0**
	49	V	0.42	7	0.0483
	50	C	0.28	7	0.4837
	51	F	1	7	0**
	52	K	0.71	7	0**
	53	G	0.57	7	0.0026*
	54	E	0.57	7	0.0026*
	55	P	0.57	7	0.0026*
	56	G	0.57	7	0.0026*
	57	C	0.85	7	0**
	58	G	1	7	0**
	59	H	1	7	0**
	60	S	0.28	7	0.4837
	61	E	0.85	7	0**
	62	P	0.71	7	0**
	63	U	0.66	6	0.0016*
	64	S	0.16	6	0.9984
	65	H	0.33	6	0.3762
	66	E	0.5	6	0.0333
	67	E	0.5	6	0.0333
	68	S	0.16	6	0.9984
	69	K	0.16	6	0.9984
	70	H	0.5	6	0.0333
	71	H	1	6	0**
	72	G	0.33	6	0.3762
	73	T	0.66	6	0.0016*
	74	P	0.5	6	0.0333
	75	T	0.16	6	0.9984
	76	H	1	6	0**
	77	M	0.33	6	0.3762
	78	H	0.5	6	0.0333
	79	O	0.5	6	0.0333
	80	KT	0.5	6	0.0333
	81	K	0.16	6	0.9984
	82	J	0.5	6	0.0333
	83	G	0.83	6	0**
	84	T	0.33	6	0.3762
	85	M	1	6	0**
	86	O	0.83	6	0**
	87	CP	0.66	6	0.0016*
	88	K	0.33	6	0.3762
	89	QC	0.33	6	0.3762
	90	G	0.66	6	0.0016*
	91	G	0.5	6	0.0333
	92	S	0.4	5	0.2729
	93	Q	0.6	5	0.0155
	94	M	0.6	5	0.0155
	95	I	0.4	5	0.2729
	96	G	0.4	5	0.2729
	97	E	1	5	0**
	98	P	0.8	5	0.0005**
	99	K	0.4	5	0.2729
	100	G	0.6	5	0.0155
	101	C	1	5	0**
	102	Q	0.2	5	0.9957
	103	J	0.4	5	0.2729
	104	F	0.8	5	0.0005**
	105	E	0.4	5	0.2729
	106	TK	0.6	5	0.0155
	107	P	0.6	5	0.0155
	108	C	0.8	5	0.0005**
	109	C	0.8	5	0.0005**
	110	P	0.8	5	0.0005**
	111	H	0.8	5	0.0005**
	112	M	0.2	5	0.9957
	113	S	0.4	5	0.2729
	114	P	0.8	5	0.0005**
	115	F	0.8	5	0.0005**
	116	G	1	5	0**
	117	L	0.6	5	0.0155
	118	T	0.4	5	0.2729
	119	K	0.2	5	0.9957
	120	C	0.4	5	0.2729
	121	E	1	4	0.0001**
	122	G	1	4	0.0001**
	123	T	0.25	4	0.9891
	124	S	0.25	4	0.9891
	125	E	1	4	0.0001**
	126	C	1	4	0.0001**
	127	M	0.5	4	0.1725
	128	L	0.25	4	0.9891
	129	G	1	4	0.0001**
	130	C	0.5	4	0.1725
	131	D	0.75	4	0.0073*
	132	D	0.75	4	0.0073*
	133	NU	1	4	0.0001**
	134	H	0.75	4	0.0073*
	135	C	1	4	0.0001**
	136	I	0.75	4	0.0073*
	137	L	0.25	4	0.9891
	138	T	0.25	4	0.9891
	139	P	0.75	4	0.0073*
	140	T	0.5	4	0.1725
	141	TK	0.5	4	0.1725
	142	P	1	4	0.0001**
	143	T	0.75	4	0.0073*
	144	U	0.75	4	0.0073*
	145	C	0.5	4	0.1725
	146	C	0.75	4	0.0073*
	147	O	0.25	4	0.9891	X
	148	M	1	4	0.0001**
	149	TK	0.5	4	0.1725
	150	C	0.75	4	0.0073*
	151	HC	0.5	4	0.1725
	152	G	0.5	4	0.1725
	153	E	0.75	4	0.0073*
	154	C	1	4	0.0001**
	155	U	0.5	4	0.1725
	156	G	0.5	4	0.1725
	157	E	0.75	4	0.0073*
	158	M	0.5	4	0.1725
	159	P	0.75	4	0.0073*
	160	S	0.5	4	0.1725		X
	161	S	0.25	4	0.9891
	162	C	0.75	4	0.0073*
	163	U	0.25	4	0.9891
	164	SG	0.25	4	0.9891
	165	J	0.5	4	0.1725
	166	J	0.25	4	0.9891
	167	G	0.5	4	0.1725
	168	S	0.5	4	0.1725
	169	P	0.5	4	0.1725
	170	S	0.25	4	0.9891
	171	MG	0.25	4	0.9891
	172	G	0.5	4	0.1725
	173	S	0.75	4	0.0073*
	174	C	1	4	0.0001**
	175	G	0.5	4	0.1725
	176	G	0.75	4	0.0073*
	177	C	1	4	0.0001**
	178	P	0.25	4	0.9891
	179	G	0.5	4	0.1725
	180	T	0.75	4	0.0073*
	181	P	0.25	4	0.9891
	182	G	0.75	4	0.0073*
	183	I	0.25	4	0.9891
	184	M	0.25	4	0.9891	X
	185	M	0.75	4	0.0073*
	186	F	0.75	4	0.0073*
	187	K	0.5	4	0.1725
	188	E	0.66	3	0.093
	189	E	0.66	3	0.093
	190	O	0.66	3	0.093
	191	L	0.33	3	0.9663
	192	J	0.66	3	0.093
	193	S	0.33	3	0.9663
	194	S	0.33	3	0.9663
	195	J	0.66	3	0.093
	196	I	0.66	3	0.093
	197	F	1	3	0.0018*
	198	EF	0.66	3	0.093
	199	I	1	3	0.0018*
	200	I	1	3	0.0018*
	201	O	0.66	3	0.093
	202	EG	0.66	3	0.093
	203	EH	0.66	3	0.093
	204	K	1	3	0.0018*
	205	D	1	3	0.0018*
	206	M	0.33	3	0.9663
	207	TK	0.33	3	0.9663	X
	208	J	0.66	3	0.093
	209	M	0.66	3	0.093
	210	M	0.66	3	0.093
	211	NU	1	3	0.0018*
	212	E	0.66	3	0.093
	213	JMG	0.33	3	0.9663
	214	G	0.33	3	0.9663	X
	215	O	1	3	0.0018*
	216	P	1	3	0.0018*
	217	G	0.66	3	0.093
	218	S	0.33	3	0.9663
	219	S	0.33	3	0.9663		X
	220	K	0.33	3	0.9663	X
	221	I	0.66	3	0.093
	222	P	1	3	0.0018*
	223	G	0.66	3	0.093
	224	G	0.66	3	0.093
	225	P	0.33	3	0.9663
	226	TK	0.33	3	0.9663
	227	V	0.33	3	0.9663	X
	228	T	0.33	3	0.9663	X
	229	O	0.66	3	0.093
	230	R	0.66	3	0.93		X
	231	V	0.66	3	0.093
	232	E	0.66	3	0.093
	233	T	0.66	3	0.093
	234	V	0.33	3	0.9663	X
	235	V	0.66	3	0.093
	236	TK	0.33	3	0.9663	X
	237	LK	0.33	3	0.9663	X
	238	G	0.66	3	0.093
	239	S	0.5	3	0.093
	240	G	0.66	3	0.093
	241	E	0.33	3	0.9663
	242	I	0.66	3	0.093
	243	S	0.33	3	0.9663
	244	P	0.66	3	0.093
	245	O	1	3	0.0018*
	246	E	0.66	3	0.093
	247	Q	0.33	3	0.9663	X
	248	LF	0.33	3	0.9663
	249	E	0.66	3	0.093
	250	M	0.33	3	0.9663	X
	251	V	1	3	0.0018*
	252	LE	0.33	3	0.9663
	253	V	0.66	3	0.093
	254	GEP	1	3	0.0018*
	255	O	0.66	3	0.093
	256	O	0.33	3	0.9663	X
	257	GS	0.33	3	0.9663
	258	C	0.66	3	0.093
	259	P	0.33	3	0.9663
	260	K	0.33	3	0.9663
	261	K	0.66	3	0.093
	262	M	1	3	0.0018*
	263	G	0.66	3	0.093
	264	S	0.66	3	0.093
	265	J	0.66	3	0.093
	266	KT	0.33	3	0.9663
	267	G	1	3	0.0018*
	268	H	0.33	3	0.9663
	269	T	0.33	3	0.9663
	270	P	1	3	0.0018*
	271	T	0.33	3	0.9663	X
	272	C	0.66	3	0.093
	273	P	0.33	3	0.9663	X
	274	SO	0.33	3	0.9663
	275	L	0.66	3	0.093
	276	C	1	3	0.0018*
	277	E	0.33	3	0.9663
	278	G	0.66	3	0.093
	279	H	0.66	3	0.093
	280	E	1	3	0.0018*
	281	H	1	3	0.0018*
	282	V	0.66	3	0.093
	283	G	0.66	3	0.093
	284	O	0.33	3	0.9663
	285	T	0.66	3	0.093
	286	O	1	3	0.0018*
	287	C	0.66	3	0.093
	288	TK	0.33	3	0.9663
	289	C	1	3	0.0018*
	290	F	0.66	3	0.093
	291	K	0.33	3	0.9663	X
	292	FP	0.66	3	0.093
	293	F	0.66	3	0.093
	294	E	0.66	3	0.093
	295	E	1	3	0.0018*
	296	M	0.33	3	0.9663
	297	G	0.66	3	0.093
	298	E	1	3	0.0018*
	299	GT	0.66	3	0.093
	300	E	0.66	3	0.093
	301	C	0.66	3	0.093
	302	C	0.66	3	0.093
	303	J	0.66	3	0.093
	304	E	0.66	3	0.093
	305	G	1	3	0.0018*
	306	P	0.66	3	0.093
	307	G	0.66	3	0.093
	308	G	1	3	0.0018*
	309	M	1	3	0.0018*
	310	M	0.33	3	0.9663
	311	M	0.66	3	0.093
	312	M	0.66	3	0.093
	313	S	0.33	3	0.9663
	314	G	0.66	3	0.093
	315	C	1	3	0.0018*
	316	NU	0.66	3	0.093
	FUNCTIONAL NETWORK
	Module#	Major COG ID	% of proteins with Major COG ID	Module Size	P-Value
	1	J	0.76	30	0**
	2	NU	0.47	23	0**
	3	EP	0.52	23	0**
	4	M	0.63	19	0**
	5	G	0.92	15	0**
	6	NT	0.71	14	0**
	7	ET	0.46	13	0**
	8	N	0.76	13	0**
	9	E	0.91	12	0**
	10	NU	1	11	0**
	11	EP	0.36	11	0.0031*
	12	C	0.8	10	0**
	13	G	0.8	10	0**
	14	P	0.3	10	0.1555
	15	C	1	9	0**
	16	TK	0.66	9	0**
	17	G	0.88	9	0**
	18	O	0.22	9	0.6726
	19	IQ	0.33	9	0.0004**
	20	NU	1	9	0**
	21	EH	0.37	9	0.0004**
	22	J	0.5	8	0.0057*
	23	U	0.37	8	0.0798
	24	O	0.5	8	0.0057*
	25	O	0.25	8	0.5895
	26	E	1	8	0**
	27	F	0.5	8	0.0798
	28	E	1	8	0**
	29	J	0.62	8	0.0006**
	30	C	1	8	0**
	31	I	1	8	0**
	32	TK	0.12	8	0.5895
	33	G	0.62	8	0.0006**
	34	K	0.87	8	0**
	35	T	0.71	7	0**
	36	L	0.42	7	0.0483
	37	J	1	7	0**
	38	H	0.85	7	0.0026*
	39	E	0.85	7	0.0026*
	40	F	1	7	0**
	41	C	0.71	7	0.0026*
	42	C	0.85	7	0**
	43	O	0.42	7	0.0483
	44	G	1	7	0**
	45	C	0.85	7	0**
	46	E	0.42	7	0.0026*
	47	G	0.57	7	0.0026*
	48	H	1	7	0**
	49	H	0.28	7	0.4837
	50	E	0.5	6	0**
	51	O	0.5	6	0.0333
	52	H	1	6	0**
	53	L	0.5	6	0.0333
	54	P	0.66	6	0.0016*
	55	O	0.83	6	0**
	56	KT	0.5	6	0.3762
	57	L	0.33	6	0.3762
	58	U	0.5	6	0.0333
	59	O	0.66	6	0**
	60	C	0.83	6	0**
	61	CP	0.66	6	0**
	62	J	0.66	6	0.0016*
	63	Q	0.16	6	0.9984
	64	S	0.16	6	0.9984
	65	H	0.5	6	0.0333
	66	H	0.83	6	0**
	67	M	1	6	0**
	68	QC	0.33	6	0.3762
	69	K	0.33	6	0.0333
	70	E	0.83	6	0.0016*
	71	G	0.66	6	0.0016*
	72	G	0.83	6	0**
	73	C	1	5	0**
	74	L	0.8	5	0.0005**
	75	L	0.6	5	0.0155
	76	T	0.6	5	0.0155
	77	P	0.6	5	0.0155
	78	G	0.4	5	0.2729
	79	M	0.4	5	0.2729
	80	G	0.6	5	0.0155
	81	E	0.4	5	0.2729
	82	TK	0.6	5	0**
	83	E	1	5	0**
	84	P	1	5	0**
	85	P	0.6	5	0.0005**
	86	U	0.6	5	0.0155
	87	M	0.8	5	0.0005**
	88	J	0.6	5	0.0155
	89	C	1	5	0**
	90	C	0.6	5	0**
	91	G	0.4	5	0.9957
	92	G	1	5	0**
	93	J	0.6	5	0.0155
	94	C	0.4	5	0.2729
	95	H	0.8	5	0.0155
	96	P	0.8	5	0.0005**
	97	P	0.8	5	0**
	98	Q	0.6	5	0.0005**
	99	M	0.2	5	0.9957
	100	P	1	5	0**
	101	E	0.4	5	0.0155
	102	H	0.4	5	0.9957
	103	I	0.4	5	0.0155
	104	P	0.6	5	0.9957
	105	M	0.6	5	0.2729
	106	G	0.4	5	0.2729
	107	EF	0.5	4	0.1725
	108	T	0.5	4	0.1725
	109	D	0.75	4	0.0073*
	110	TK	0.5	4	0.0001**
	111	C	1	4	0.0001**
	112	H	1	4	0.0001**
	113	O	0.5	4	0.1725
	114	G	0.75	4	0.0073*
	115	F	1	4	0.0001**
	116	P	0.5	4	0.0073*
	117	C	1	4	0.0001**
	118	TK	0.5	4	0.0073*
	119	L	0.25	4	0.9891
	120	T	0.75	4	0.0073*
	121	D	0.75	4	0.0073*
	122	C	0.5	4	0.1725
	123	H	0.75	4	0.0073*
	124	M	0.5	4	0.0073*
	125	E	1	4	0.0001**
	126	E	0.75	4	0.0073*
	127	S	0.5	4	0.1725
	128	T	0.5	4	0.1725
	129	H	0.75	4	0.0073*
	130	G	1	4	0.0001**
	131	P	0.25	4	0.9891
	132	P	0.25	4	0.9891
	133	C	1	4	0.0001**
	134	C	0.75	4	0.0073*
	135	G	1	4	0.0073*
	136	GT	0.25	4	0.1725
	137	C	1	4	0.0073*
	138	G	0.5	4	0.1725
	139	E	0.75	4	0.0073*
	140	O	0.5	4	0.1725
	141	K	1	4	0.0073*
	142	M	1	4	0.0073*
	143	F	0.75	4	0.0073*
	144	E	0.25	4	0.9891
	145	E	0.5	4	0.1725
	146	M	0.75	4	0.0073*
	147	M	1	4	0.0001**
	148	KG	0.25	4	0.9891
	149	LKJ	1	4	0.0001**
	150	G	0.5	4	0.1725
	151	M	0.25	4	0.9891
	152	I	0.25	4	0.9891
	153	G	0.75	4	0.0073*
	154	G	0.5	4	0.0073*
	155	EG	0.75	4	0.0073*
	156	J	0.5	4	0.1725
	157	J	0.25	4	0.9891
	158	M	0.5	4	0.1725
	159	G	0.5	4	0.1725
	160	C	0.75	4	0.1725
	161	G	1	4	0.0001**
	162	NU	1	4	0.0073*
	163	S	0.5	4	0.1725
	164	EH	0.66	3	0.093
	165	L	1	3	0.093
	166	O	0.66	3	0.0018*
	167	U	1	3	0.9663
	168	I	0.66	3	0.093
	169	TK	0.33	3	0.9663
	170	T	0.66	3	0.093
	171	TK	0.33	3	0.9663
	172	V	0.33	3	0.9663
	173	H	0.66	3	0.093
	174	E	1	3	0.0018*
	175	I	0.66	3	0.093
	176	F	0.66	3	0.093
	177	J	1	3	0.093
	178	L	0.66	3	0.093
	179	G	0.66	3	0.093
	180	E	0.66	3	0.093
	181	SG	0.33	3	0.9663
	182	G	0.66	3	0.9663
	183	O	0.66	3	0.093
	184	L	0.66	3	0.093
	185	G	1	3	0.0018*
	186	P	1	3	0.093
	187	O	1	3	0.0018*
	188	M	0.33	3	0.9663
	189	J	0.66	3	0.093
	190	J	1	3	0.093
	191	FP	0.66	3	0.9663
	192	V	0.66	3	0.093
	193	H	1	3	0.0018*
	194	S	0.66	3	0.093
	195	P	1	3	0.0018*
	196	E	0.66	3	0.093
	197	S	0.33	3	0.093
	198	V	0.66	3	0.093
	199	G	1	3	0.0018*
	200	V	0.66	3	0.093
	201	T	0.33	3	0.9663
	202	M	0.33	3	0.9663
	203	M	0.33	3	0.9663
	204	P	0.66	3	0.093
	205	G	1	3	0.093
	206	K	0.33	3	0.9663
	208	E	0.66	3	0.093
	209	E	0.66	3	0.093
	210	V	1	3	0.0018*
	211	NU	0.66	3	0.093
	212	IQ	0.33	3	0.9663
	213	G	0.66	3	0.093
	214	I	0.66	3	0.093
	215	M	0.33	3	0.9663
	216	H	0.66	3	0.0018*
	217	G	1	3	0.0018*
	218	K	0.66	3	0.093
	219	C	1	3	0.0018*
	220	C	0.66	3	0.093
	221	S	0.33	3	0.9663
	222	S	0.33	3	0.9663
	223	M	0.33	3	0.9663
	224	LE	0.33	3	0.9663
	225	J	0.66	3	0.093
	226	L	1	3	0.0018*
	227	M	0.33	3	0.9663
	228	C	0.66	3	0.093
	229	G	0.66	3	0.093
	230	G	0.66	3	0.093
	231	P	0.66	3	0.9663
	232	M	0.33	3	0.9663
	233	L	0.33	3	0.9663
	234	KT	0.33	3	0.093
	235	G	1	3	0.093
	236	E	0.66	3	0.093
	237	C	0.66	3	0.9663
	238	C	0.66	3	0.093
	239	L	0.33	3	0.093
	240	E	1	3	0.0018*
	241	TK	0.33	3	0.9663
	242	G	0.66	3	0.9663
	243	E	0.66	3	0.093
	244	E	1	3	0.0018*
	245	E	0.66	3	0.0018*
	246	K	0.33	3	0.9663
	247	T	0.66	3	0.0018*
	248	G	0.66	3	0.9663
	249	C	1	3	0.093
	250	P	1	3	0.093
	251	H	0.33	3	0.9663
	252	J	0.66	3	0.093
	253	K	0.33	3	0.9663
	254	S	0.33	3	0.9663
	255	C	0.66	3	0.093
	256	O	1	3	0.0018*
	257	E	0.33	3	0.9663
	258	P	0.33	3	0.9663
	259	P	1	3	0.0018*
	260	P	1	3	0.0018*
	261	KT	0.33	3	0.9663
	262	T	0.33	3	0.9663
	263	G	0.33	3	0.9663
	264	NU	1	3	0.0018*
	265	J	0.66	3	0.093
	266	E	1	3	0.0018*
	267	V	0.33	3	0.9663
	268	M	1	3	0.093
	269	GT	0.66	3	0.093
	271	G	0.66	3	0.9663
	272	G	0.66	3	0.093
	273	I	0.66	3	0.9663
	274	M	0.66	3	0.093
	275	LC	0.33	3	0.9663
	276	GEP	1	3	0.0018*
	277	C	1	3	0.093
	278	F	1	3	0.0018*
	279	C	1	3	0.0018*
	EXPERIMENTAL NETWORK
	Module#	Major COG ID	% of proteins with Major COG ID	Module Size	P-Value
	1	J	0.27	65	0**
	2	L	0.17	57	0.063
	3	E	0.14	34	0.3694
	4	J	0.82	28	0**
	5	M	0.16	25	0.4181
	6	O	0.2	20	0.3123
	6	O	0.2	3	1
	7	J	0.56	16	0**
	7	J	0.56	3	1
	8	S	0.14	14	1.8652
	9	G	0.3	13	0.0109
	10	K	0.58	12	0**
	11	S	0.16	12	1.7247
	12	J	0.63	11	0**
	13	H	0.27	11	0.0498
	14	L	0.63	11	0**
	15	L	0.8	10	0**
	16	P	0.25	8	0.9998
	17	S	0.12	8	0.9998
	18	IQ	0.37	8	0.0057*
	19	M	0.28	7	0.4837
	20	K	0.28	7	0.4837
	21	C	0.28	7	0.4837
	22	S	0.28	7	0.4837
	23	G	0.28	7	0.9996
	24	M	0.5	6	0.0333
	25	T	0.16	6	0.9984
	26	J	0.16	6	0.9984
	27	C	0.83	6	0.0016*
	28	C	1	6	0**
	29	V	0.5	6	0.0333
	30	K	0.83	6	0**
	31	J	0.16	6	0.9984
	32	M	0.33	6	0.3762
	33	O	0.2	5	0.9957
	34	L	0.6	5	0.0005**
	35	P	0.2	5	0.9957
	36	T	0.2	5	0.9957
	37	S	0.6	5	0.2729
	38	L	0.6	5	0.0155
	39	I	0.4	5	0.2729
	40	T	0.25	4	0.9891
	41	L	0.5	4	0.1725
	42	E	0.5	4	0.1725
	43	C	0.25	4	0.9891
	44	L	0.25	4	0.9891
	45	TK	0.33	4	0.1725
	46	S	0.25	4	0.9891
	47	S	0.25	4	0.9891
	48	MG	0.25	4	0.9891
	49	C	0.75	4	0.0073*
	50	G	0.5	4	0.1725
	51	E	0.75	4	0.1725
	52	P	0.75	4	0.1725
	53	U	0.33	3	0.9663
	54	S	0.33	3	0.9663
	55	P	0.33	3	0.9663
	56	S	0.33	3	0.9663
	57	H	0.33	3	0.9663
	58	I	0.66	3	0.093
	59	S	0.33	3	0.9663
	60	S	0.33	3	0.9663
	61	E	0.66	3	0.093
	62	S	0.33	3	0.9663
	63	U	0.33	3	0.9663
	65	KT	0.33	3	0.093
	66	S	0.33	3	0.9663
	67	J	1	3	0.0018*
	68	M	1	3	0.0018*
	69	L	0.66	3	0.093
	70	C	0.66	3	0.093
	71	H	1	3	0.0018*
	72	D	1	3	0.0018*
	73	P	0.66	3	0.093
	74	U	0.33	3	0.9663
	75	C	0.33	3	0.9663
	77	K	0.66	3	0.093
	78	O	1	3	0.0018*
	79	S	0.33	3	0.9663
	80	T	0.33	3	0.9663
	81	T	0.33	3	0.9663
	82	P	0.33	3	0.9663
	83	E	1	3	0.0018*
	84	S	0.33	3	0.9663
	85	K	0.66	3	0.093
	86	S	0.33	3	0.9663
	87	O	0.33	3	0.9663
	88	P	0.33	3	0.9663
	89	C	0.66	3	0.093
	90	C	0.33	3	0.9663
	91	T	0.33	3	0.9663
	92	O	0.66	3	0.093
	93	L	1	3	0.0018*
	94	U	0.33	3	0.9663
	95	I	0.33	3	0.9663
	96	K	0.33	3	0.093
	97	T	0.66	3	0.093
	98	O	0.66	3	0.093
	99	J	0.66	3	0.9663
