# Supplementary material for: The Modular Organization of Protein Interactions in Escherichia coli
Source: PLoS Comput Biol. 2009 Oct 2;5(10):e1000523. doi: 10.1371/journal.pcbi.1000523 (PMC2739439; doi:10.1371/journal.pcbi.1000523)
Supplement: Table S5 — List of genomes used for comparative analyses. List of full sequenced genomes analysed in the study obtained from the COGENT database [33]. Species are ordered by major taxonomic groups (Archaea; Bacteria; Eukaryota) and are also coloured by minor taxonomic groups. For each species its COGENT id and the number of sequences associated with the genome are given. (0.06 MB XLS) [file pcbi.1000523.s015.xls]

## Sheet: Sheet1
Supplemental Table 5. List of genomes used for comparative analyses
Taxon	Domain	Species	COGENES ID	Genes
Crenarchaeota	Archaea	Aeropyrum pernix	APER-XK1-01	2694
Crenarchaeota	Archaea	Pyrobaculum aerophilum	PAER-IM2-01	2605
Crenarchaeota	Archaea	Sulfolobus solfataricus	SSOL-XP2-01	2995
Crenarchaeota	Archaea	Sulfolobus tokodaii	STOK-XX7-01	2826
Euryarchaeota	Archaea	Archaeoglobus fulgidus	AFUL-DSM-01	2409
Euryarchaeota	Archaea	Halobacterium sp.	HALO-NRC-01	2605
Euryarchaeota	Archaea	Methanobacterium thermoautotrophicum	MTHE-DEL-01	1871
Euryarchaeota	Archaea	Methanococcus jannaschii	MJAN-DSM-01	1773
Euryarchaeota	Archaea	Methanococcus maripaludis	MMAR-XS2-01	1722
Euryarchaeota	Archaea	Methanopyrus kandleri	MKAN-AV1-01	1687
Euryarchaeota	Archaea	Methanosarcina acetivorans	MACE-C2A-01	4528
Euryarchaeota	Archaea	Methanosarcina mazei	MMAZ-GO1-01	3371
Euryarchaeota	Archaea	Picrophilus torridus	PTOR-790-01	1535
Euryarchaeota	Archaea	Pyrococcus abyssi	PABY-GE5-01	1765
Euryarchaeota	Archaea	Pyrococcus furiosus	PFUR-638-01	2065
Euryarchaeota	Archaea	Pyrococcus horikoshii	PHOR-OT3-01	2061
Euryarchaeota	Archaea	Thermoplasma acidophilum	TACI-DSM-01	1478
Euryarchaeota	Archaea	Thermoplasma volcanium	TVOL-GSS-01	1526
Nanoarcheota	Archaea	Nanoarchaeum equitans	NEQU-N4M-01	563
Taxon	Domain	Species	COGENES ID	Genes
Alphaproteobacteria	Bacteria	Agrobacterium tumefaciens	ATUM-C58-01	5299
Alphaproteobacteria	Bacteria	Bartonella henselae	BHEN-HOU-01	1488
Alphaproteobacteria	Bacteria	Bartonella quintana	BQUI-TOU-01	1142
Alphaproteobacteria	Bacteria	Bradyrhizobium japonicum	BJAP-USD-01	8317
Alphaproteobacteria	Bacteria	Brucella melitensis	BMEL-M16-01	3198
Alphaproteobacteria	Bacteria	Brucella suis	BSUI-133-01	3293
Alphaproteobacteria	Bacteria	Caulobacter crescentus	CCRE-XXX-01	3737
Alphaproteobacteria	Bacteria	Rhodopseudomonas palustris	RPAL-009-01	4814
Alphaproteobacteria	Bacteria	Rickettsia conorii	RCON-MAL-01	1374
Alphaproteobacteria	Bacteria	Rickettsia prowazekii	RPRO-MAD-01	834
Alphaproteobacteria	Bacteria	Rickettsia typhi	RTYP-144-01	838
Alphaproteobacteria	Bacteria	Sinorhizobium meliloti	SMEL-102-01	6206
Alphaproteobacteria	Bacteria	Wolbachia pipientis	WPIP-WME-01	1176
Betaproteobacteria	Bacteria	Bordetella bronchiseptica	BBRO-252-01	4994
Betaproteobacteria	Bacteria	Bordetella parapertussis	BPAR-253-01	4185
Betaproteobacteria	Bacteria	Bordetella pertussis	BPER-251-01	3447
Betaproteobacteria	Bacteria	Burkholderia mallei	BMAL-344-01	4764
Betaproteobacteria	Bacteria	Burkholderia pseudomallei	BPSE-243-01	5729
Betaproteobacteria	Bacteria	Chromobacterium violaceum	CVIO-472-01	4407
Betaproteobacteria	Bacteria	Neisseria meningitidis	NMEN-Z24-01	2065
Betaproteobacteria	Bacteria	Neisseria meningitidis	NMEN-MC5-01	2081
Betaproteobacteria	Bacteria	Nitrosomonas europaea	NEUR-718-01	2461
Betaproteobacteria	Bacteria	Ralstonia solanacearum	RSOL-XXX-01	5116
Gammaproteobacteria	Bacteria	Blochmannia floridanus	BFLO-XXX-01	583
Gammaproteobacteria	Bacteria	Buchnera aphidicola	BAPH-XBP-01	504
Gammaproteobacteria	Bacteria	Buchnera aphidicola	BAPH-XSG-01	545
Gammaproteobacteria	Bacteria	Buchnera sp.	BUCH-APS-01	575
Gammaproteobacteria	Bacteria	Coxiella burnetii	CBUR-RSA-01	2045
Gammaproteobacteria	Bacteria	Erwinia carotovora subsp. atroseptica	ECAR-043-01	4472
Gammaproteobacteria	Bacteria	Escherichia coli	ECOL-CFT-01	5379
Gammaproteobacteria	Bacteria	Escherichia coli	ECOL-MG1-01	4290
Gammaproteobacteria	Bacteria	Escherichia coli 0157:H7	ECOL-RIM-01	5447
Gammaproteobacteria	Bacteria	Escherichia coli O157:H7	ECOL-EDL-01	5349
Gammaproteobacteria	Bacteria	Haemophilus influenzae	HINF-KW2-01	1707
Gammaproteobacteria	Bacteria	Legionella pneumophila	LPNE-LEN-01	2934
Gammaproteobacteria	Bacteria	Legionella pneumophila	LPNE-PHI-01	2942
Gammaproteobacteria	Bacteria	Mannheimia succiniciproducens	MSUC-55E-01	2384
Gammaproteobacteria	Bacteria	Methylococcus capsulatus (Bath)	MCAP-BAT-01	2959
Gammaproteobacteria	Bacteria	Pasteurella multocida	PMUL-PM7-01	2014
Gammaproteobacteria	Bacteria	Photorhabdus luminescens	PLUM-TO1-01	4683
Gammaproteobacteria	Bacteria	Pseudomonas aeruginosa	PAER-PAO-01	5570
Gammaproteobacteria	Bacteria	Pseudomonas putida	PPUT-KT2-01	5387
Gammaproteobacteria	Bacteria	Pseudomonas syringae pv. tomato	PSYR-DC3-01	5471
Gammaproteobacteria	Bacteria	Salmonella enterica	SENT-TY2-01	4323
Gammaproteobacteria	Bacteria	Salmonella enterica serovar Typhi	SENT-CT1-02	4767
Gammaproteobacteria	Bacteria	Salmonella enterica serovar Typhimurium	SENT-LT2-01	4553
Gammaproteobacteria	Bacteria	Shewanella oneidensis	SONE-MR1-01	4867
Gammaproteobacteria	Bacteria	Shigella flexneri	SFLE-457-01	4068
Gammaproteobacteria	Bacteria	Shigella flexneri (serotype 2a)	SFLE-301-01	4452
Gammaproteobacteria	Bacteria	Vibrio cholerae	VCHO-N16-01	3835
Gammaproteobacteria	Bacteria	Vibrio parahaemolyticus	VPAR-RIM-01	4832
Gammaproteobacteria	Bacteria	Vibrio vulnificus	VVUL-YJ0-01	5028
Gammaproteobacteria	Bacteria	Wigglesworthia glossinidia brevipalpis	WGLO-BRE-01	611
Gammaproteobacteria	Bacteria	Xanthomonas axonopodis pv. citri	XAXO-306-02	4427
Gammaproteobacteria	Bacteria	Xanthomonas campestris pv. campestris	XCAM-AT3-01	4181
Gammaproteobacteria	Bacteria	Xylella fastidiosa	XFAS-9A5-01	2830
Gammaproteobacteria	Bacteria	Xylella fastidiosa	XFAS-XPD-01	2036
Gammaproteobacteria	Bacteria	Yersinia pestis	YPES-CO9-01	4093
Gammaproteobacteria	Bacteria	Yersinia pestis	YPES-KIM-01	4281
Gammaproteobacteria	Bacteria	Yersinia pseudotuberculosis	YPSE-953-01	4038
Deltaproteobacteria	Bacteria	Bdellovibrio bacteriovorus	BBAC-100-01	3583
Deltaproteobacteria	Bacteria	Desulfotalea psychrophila	DPSY-V54-01	3236
Deltaproteobacteria	Bacteria	Desulfovibrio vulgaris	DVUL-HIL-01	3514
Deltaproteobacteria	Bacteria	Geobacter sulfurreducens	GSUL-PCA-01	3445
Epsilonproteobacteria	Bacteria	Campylobacter jejuni	CJEJ-NCT-01	1634
Epsilonproteobacteria	Bacteria	Helicobacter hepaticus	HHEP-449-01	1875
Epsilonproteobacteria	Bacteria	Helicobacter pylori	HPYL-J99-01	1491
Epsilonproteobacteria	Bacteria	Helicobacter pylori	HPYL-266-01	1575
Epsilonproteobacteria	Bacteria	Wolinella succinogenes strain DSM 1740	WSUC-740-01	2044
Cyanobacteria	Bacteria	Anabaena sp.	NOST-PCC-01	6129
Cyanobacteria	Bacteria	Gloeobacter violaceus	GVIO-421-01	4430
Cyanobacteria	Bacteria	Prochlorococcus marinus	PMAR-MED-01	1712
Cyanobacteria	Bacteria	Prochlorococcus marinus	PMAR-SS1-01	1882
Cyanobacteria	Bacteria	Prochlorococcus marinus	PMAR-MIT-01	2265
Cyanobacteria	Bacteria	Synechococcus sp.	SYCC-WH8-01	2517
Cyanobacteria	Bacteria	Synechocystis sp.	SYNE-PCC-01	3167
Cyanobacteria	Bacteria	Thermosynechococcus elongatus	TELO-BP1-01	2475
Actinobacteridae	Bacteria	Bifidobacterium longum	BLON-NCC-01	1729
Actinobacteridae	Bacteria	Corynebacterium diphtheriae	CDIP-129-01	2272
Actinobacteridae	Bacteria	Corynebacterium efficiens	CEFF-YS3-01	2950
Actinobacteridae	Bacteria	Corynebacterium glutamicum	CGLU-XXX-01	3040
Actinobacteridae	Bacteria	Leifsonia xyli subsp. xyli	LXYL-B07-01	2030
Actinobacteridae	Bacteria	Mycobacterium bovis	MBOV-AF2-01	3920
Actinobacteridae	Bacteria	Mycobacterium leprae	MLEP-XTN-01	1605
Actinobacteridae	Bacteria	Mycobacterium tuberculosis	MTUB-H37-01	3924
Actinobacteridae	Bacteria	Mycobacterium tuberculosis	MTUB-CDC-01	4203
Actinobacteridae	Bacteria	Nocardia farcinica	NFAR-152-01	5936
Actinobacteridae	Bacteria	Propionibacterium acnes	PACN-202-01	2297
Actinobacteridae	Bacteria	Streptomyces avermitilis	SAVE-XXX-01	7671
Actinobacteridae	Bacteria	Streptomyces coelicolor	SCOE-A32-01	7810
Actinobacteridae	Bacteria	Symbiobacterium thermophilum	SYTH-863-01	3337
Actinobacteridae	Bacteria	Tropheryma whipplei	TWHI-TW0-01	783
Actinobacteridae	Bacteria	Tropheryma whipplei	TWHI-TWI-01	808
Firmicutes	Bacteria	Bacillus anthracis	BANT-AME-01	5311
Firmicutes	Bacteria	Bacillus cereus	BCER-579-01	5255
Firmicutes	Bacteria	Bacillus cereus	BCER-987-01	5603
Firmicutes	Bacteria	Bacillus halodurans	BHAL-C12-01	4066
Firmicutes	Bacteria	Bacillus licheniformis	BLIC-580-01	4161
Firmicutes	Bacteria	Bacillus subtilis	BSUB-168-01	4093
Firmicutes	Bacteria	Clostridium acetobutylicum	CACE-ATC-01	3916
Firmicutes	Bacteria	Clostridium perfringens	CPER-X13-01	2723
Firmicutes	Bacteria	Clostridium tetani	CTET-E88-01	2432
Firmicutes	Bacteria	Enterococcus faecalis	EFAE-V58-01	3113
Firmicutes	Bacteria	Lactobacillus johnsonii	LJOH-533-01	1821
Firmicutes	Bacteria	Lactobacillus plantarum	LPLA-WCF-01	3009
Firmicutes	Bacteria	Lactococcus lactis	LLAC-IL1-01	2266
Firmicutes	Bacteria	Listeria innocua	LINN-CLI-01	2968
Firmicutes	Bacteria	Listeria monocytogenes	LMON-365-01	2809
Firmicutes	Bacteria	Listeria monocytogenes	LMON-854-01	2961
Firmicutes	Bacteria	Listeria monocytogenes	LMON-858-01	3097
Firmicutes	Bacteria	Listeria monocytogenes	LMON-EGD-01	2846
Firmicutes	Bacteria	Mycoplasma gallisepticum	MGAL-RLO-01	726
Firmicutes	Bacteria	Mycoplasma genitalium	MGEN-G37-01	479
Firmicutes	Bacteria	Mycoplasma hyopneumoniae	MHYO-232-01	691
Firmicutes	Bacteria	Mycoplasma mobile	MMOB-63K-01	635
Firmicutes	Bacteria	Mycoplasma mycoides subsp. mycoides SC strain PG1	MMYC-G1T-01	1016
Firmicutes	Bacteria	Mycoplasma penetrans	MPEN-HF2-01	1037
Firmicutes	Bacteria	Mycoplasma pneumoniae	MPNE-M12-01	689
Firmicutes	Bacteria	Mycoplasma pulmonis	MPUL-UAB-01	782
Firmicutes	Bacteria	Oceanobacillus iheyensis	OIHE-HET-01	3496
Firmicutes	Bacteria	Phytoplasma asteris	PAST-XOY-01	754
Firmicutes	Bacteria	Staphylococcus aureus	SAUR-252-01	2656
Firmicutes	Bacteria	Staphylococcus aureus	SAUR-476-01	2579
Firmicutes	Bacteria	Staphylococcus aureus MRSA	SAUR-MW2-01	2658
Firmicutes	Bacteria	Staphylococcus aureus MRSA	SAUR-N13-01	2623
Firmicutes	Bacteria	Staphylococcus aureus VRSA	SAUR-MU5-01	2748
Firmicutes	Bacteria	Streptococcus agalactiae	SAGA-260-01	2144
Firmicutes	Bacteria	Streptococcus agalactiae	SAGA-NEM-01	2094
Firmicutes	Bacteria	Streptococcus mutans	SMUT-UA1-01	1960
Firmicutes	Bacteria	Streptococcus pneumoniae	SPNE-TIG-01	2140
Firmicutes	Bacteria	Streptococcus pneumoniae	SPNE-XR6-01	2043
Firmicutes	Bacteria	Streptococcus pyogenes	SPYO-394-01	1886
Firmicutes	Bacteria	Streptococcus pyogenes M1	SPYO-SF3-01	1696
Firmicutes	Bacteria	Streptococcus pyogenes M18	SPYO-MGA-01	1845
Firmicutes	Bacteria	Streptococcus pyogenes M3	SPYO-SSI-01	1861
Firmicutes	Bacteria	Streptococcus pyogenes M3	SPYO-XM3-01	1865
Firmicutes	Bacteria	Thermoanaerobacter tengcongensis	TTEN-MB4-01	2588
Firmicutes	Bacteria	Ureaplasma urealyticum	UURE-SV3-01	613
Spirochaetes	Bacteria	Borrelia burgdorferi	BBUR-B31-01	1639
Spirochaetes	Bacteria	Leptospira interrogans	LINT-130-01	3660
Spirochaetes	Bacteria	Leptospira interrogans	LINT-566-01	4727
Spirochaetes	Bacteria	Treponema denticola	TDEN-405-01	2767
Spirochaetes	Bacteria	Treponema pallidum	TPAL-NIC-01	1030
others	Bacteria	Aquifex aeolicus	AAEO-VF5-01	1553
others	Bacteria	Bacteroides fragilis	BFRA-H46-01	4625
others	Bacteria	Bacteroides thetaiotaomicron	BTHE-VPI-01	4778
others	Bacteria	Chlamydia pneumoniae	CPNE-AR3-01	1119
others	Bacteria	Chlamydia pneumoniae	CPNE-CWL-01	1052
others	Bacteria	Chlamydia pneumoniae	CPNE-J13-01	1070
others	Bacteria	Chlamydia trachomatis	CTRA-MOP-01	921
others	Bacteria	Chlamydia trachomatis	CTRA-SVD-01	894
others	Bacteria	Chlamydophila caviae	CCAV-GPI-01	1005
others	Bacteria	Chlorobium tepidum	CTEP-TLS-01	2252
others	Bacteria	Deinococcus radiodurans	DRAD-XR1-01	3116
others	Bacteria	Fusobacterium nucleatum	FNUC-ATC-01	2067
others	Bacteria	Parachlamydia sp.	PCHL-E25-01	2031
others	Bacteria	Pirellula sp.	PIRE-ST1-01	7325
others	Bacteria	Porphyromonas gingivalis	PGIN-W83-01	1909
others	Bacteria	Thermotoga maritima	TMAR-MSB-01	1849
others	Bacteria	Thermus thermophilus	TTHE-B27-01	2210
Taxon	Domain	Species	COGENES ID	Genes
Plantae (Spermatophyta)	Eukaryota	Arabidopsis thaliana	ATHA-XXX-01	25761
Plantae (Rhodophyta)	Eukaryota	Cyanidioschyzon merolae	CMER-10D-01	4772
Protist	Eukaryota	Cryptosporidium parvum	CPAR-TII-01	3396
Protist	Eukaryota	Plasmodium falciparum	PFAL-3D7-01	5295
Microsporidia	Eukaryota	Encephalitozoon cuniculi	ECUN-XXX-01	1996
Fungi	Eukaryota	Ashbya gossypii	AGOS-XXX-01	4726
Fungi	Eukaryota	Candida glabrata	CGLA-138-01	5272
Fungi	Eukaryota	Debaryomyces hansenii CBS767	DHAN-767-01	6896
Fungi	Eukaryota	Kluyveromyces lactis	KLAC-210-01	5331
Fungi	Eukaryota	Neurospora crassa	NCRA-XX3-01	10082
Fungi	Eukaryota	Saccharomyces cerevisiae	SCER-S28-01	6357
Fungi	Eukaryota	Schizosaccharomyces pombe	SPOM-XXX-01	4945
Fungi	Eukaryota	Yarrowia lipolytica	YLIP-B99-01	6666
Metazoa (Arthropoda)	Eukaryota	Anopheles gambiae	AGAM-PES-01	15101
Metazoa (Arthropoda)	Eukaryota	Drosophila melanogaster	DMEL-XXX-02	18484
Metazoa (Nematoda)	Eukaryota	Caenorhabditis briggsae	CBRI-XXX-01	19507
Metazoa (Nematoda)	Eukaryota	Caenorhabditis elegans	CELE-XXX-01	19957
Metazoa (Deuterostoma)	Eukaryota	Homo sapiens	HSAP-XXX-03	32035
Metazoa (Deuterostoma)	Eukaryota	Mus musculus	MMUS-XXX-02	25371
